# Supplementary figures and images for: Conveniently Pre-Tagged and Pre-Packaged: Extended Molecular Identification and Metagenomics Using Complete Metazoan Mitochondrial Genomes (part 3 of 10)
Source: PLOS journal article supplement (doi:10.1371/journal.pone.0051263), 2012-12-14

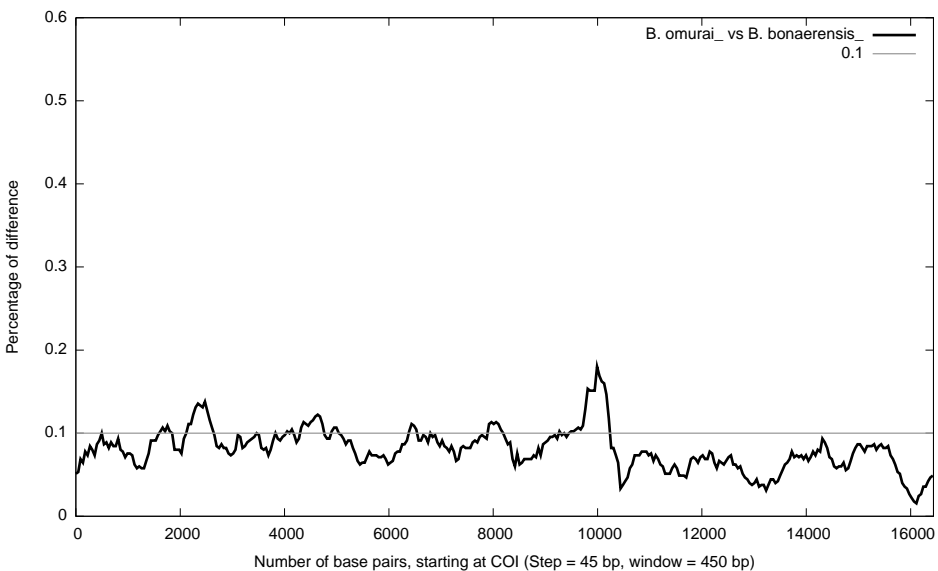

Supplement: S3 (10.1371/journal.pone.0051263.s003) [file journal.pone.0051263.s003]

# Phocidae

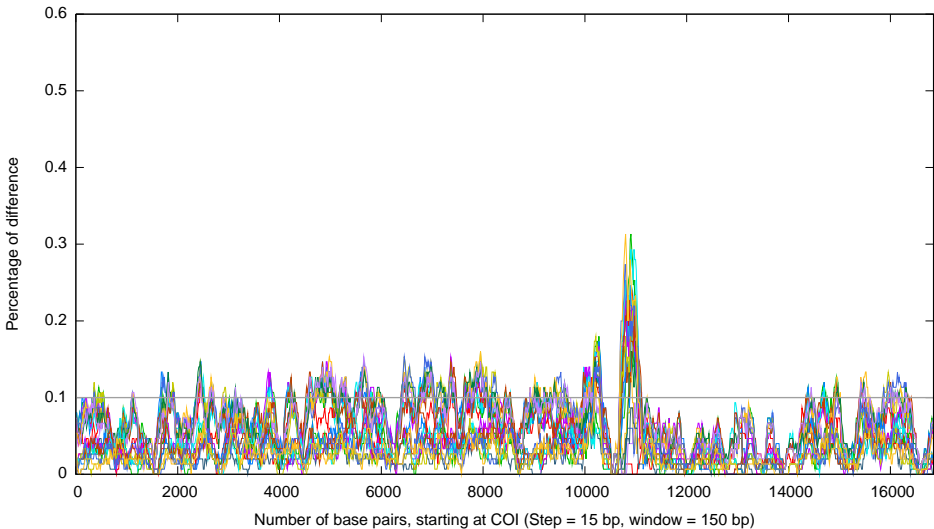

Supplement: S3 (10.1371/journal.pone.0051263.s003) [file journal.pone.0051263.s003]

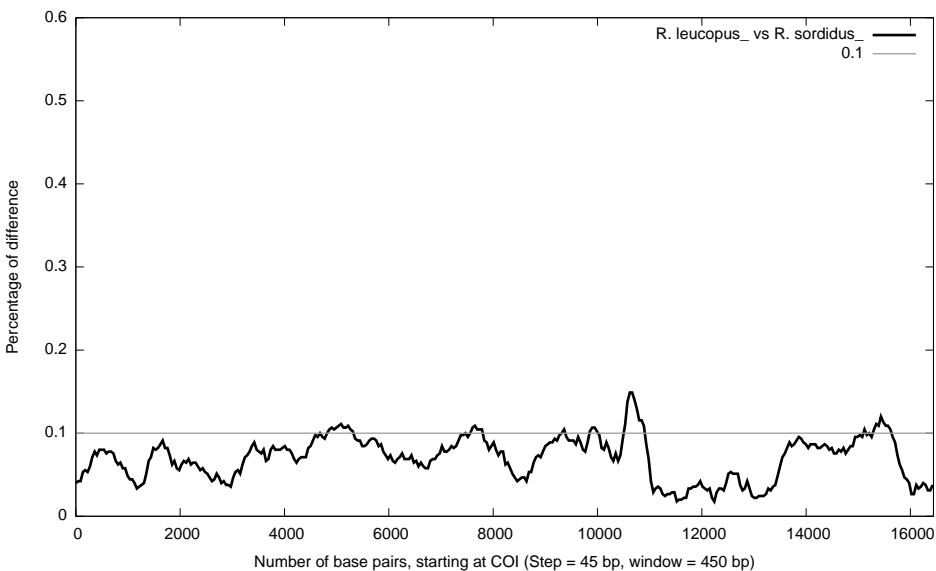

Supplement: S3 (10.1371/journal.pone.0051263.s003) [file journal.pone.0051263.s003]

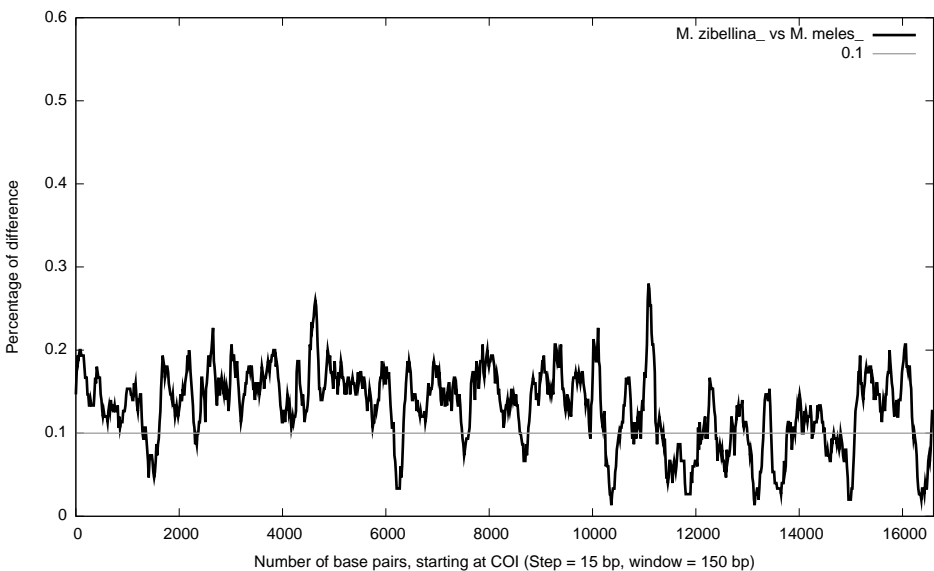

Supplement: S3 (10.1371/journal.pone.0051263.s003) [file journal.pone.0051263.s003]

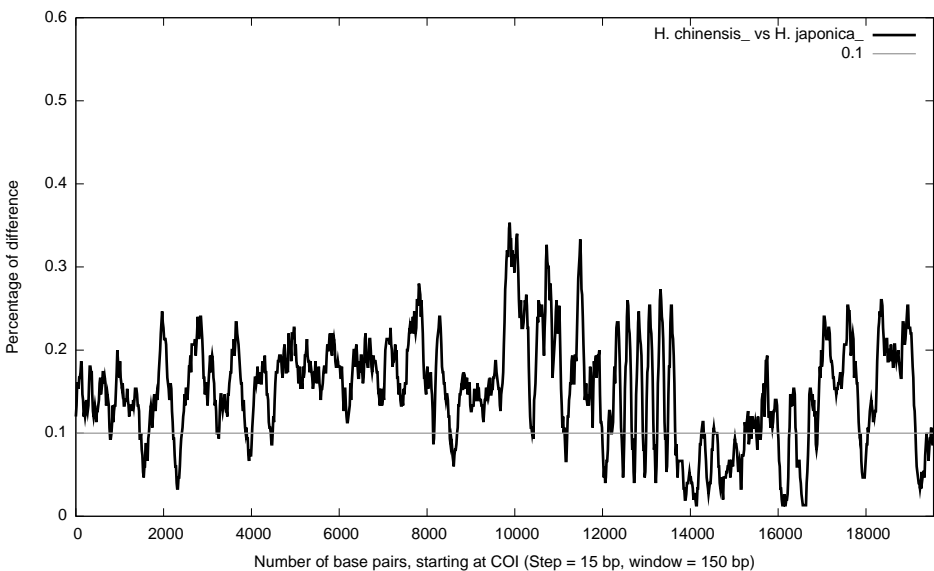

Supplement: S3 (10.1371/journal.pone.0051263.s003) [file journal.pone.0051263.s003]

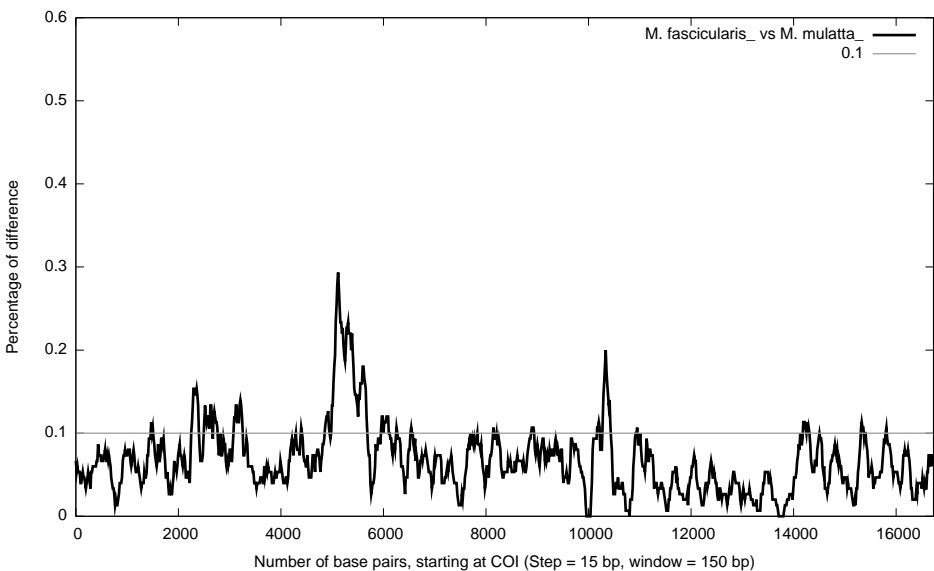

Supplement: S3 (10.1371/journal.pone.0051263.s003) [file journal.pone.0051263.s003]

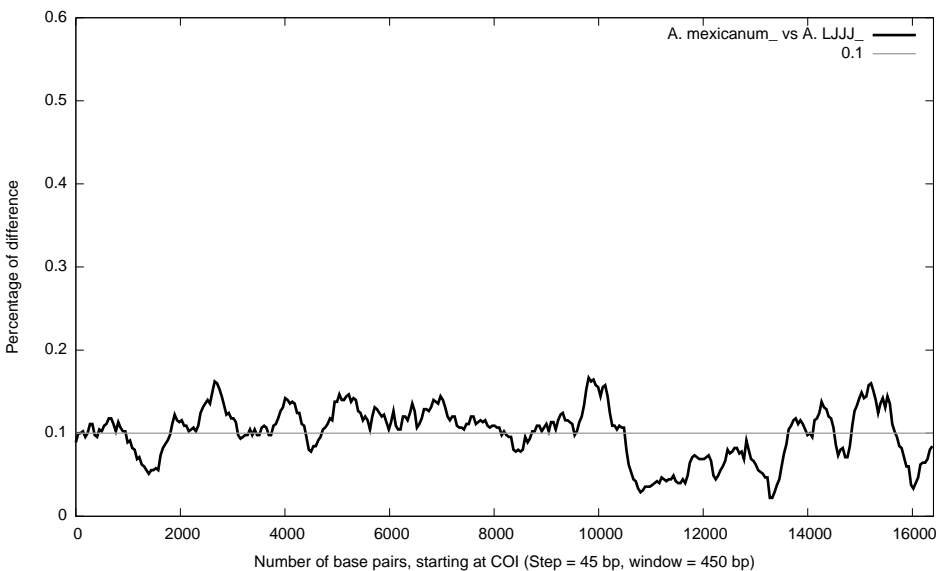

Supplement: S3 (10.1371/journal.pone.0051263.s003) [file journal.pone.0051263.s003]

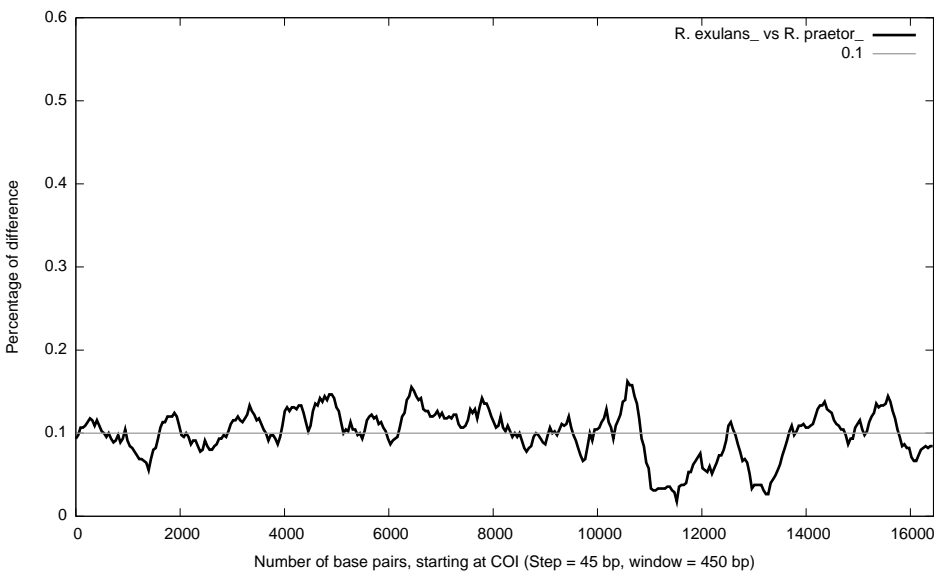

Supplement: S3 (10.1371/journal.pone.0051263.s003) [file journal.pone.0051263.s003]

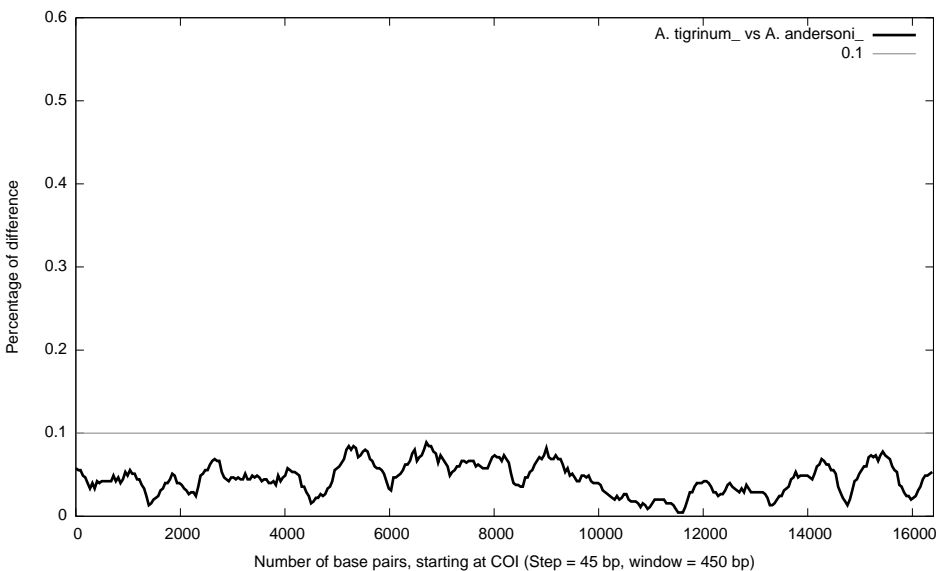

Supplement: S3 (10.1371/journal.pone.0051263.s003) [file journal.pone.0051263.s003]

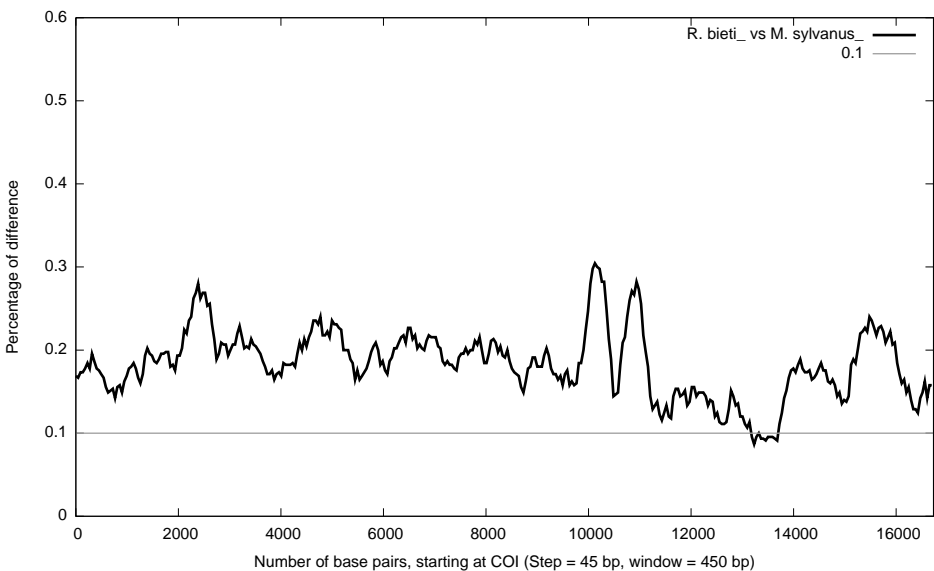

Supplement: S3 (10.1371/journal.pone.0051263.s003) [file journal.pone.0051263.s003]

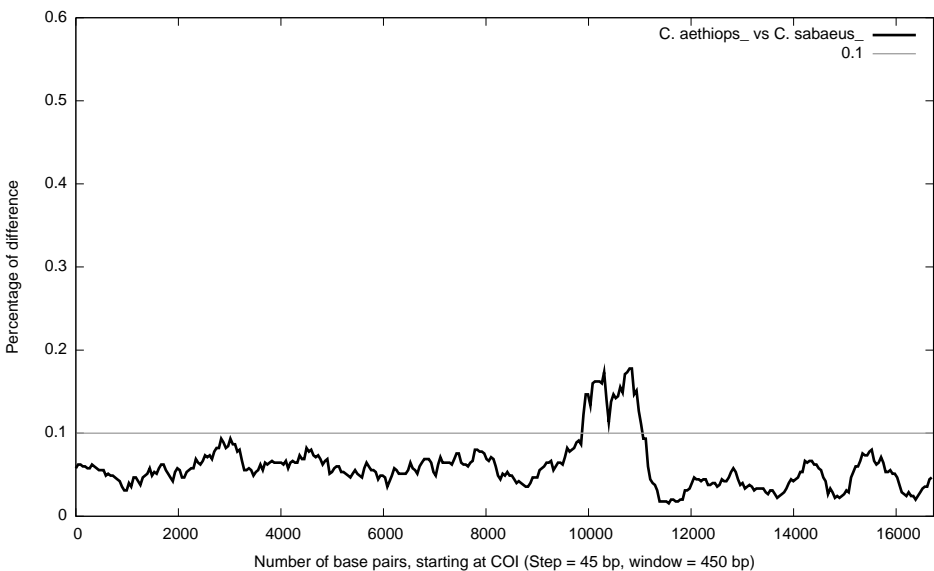

Supplement: S3 (10.1371/journal.pone.0051263.s003) [file journal.pone.0051263.s003]

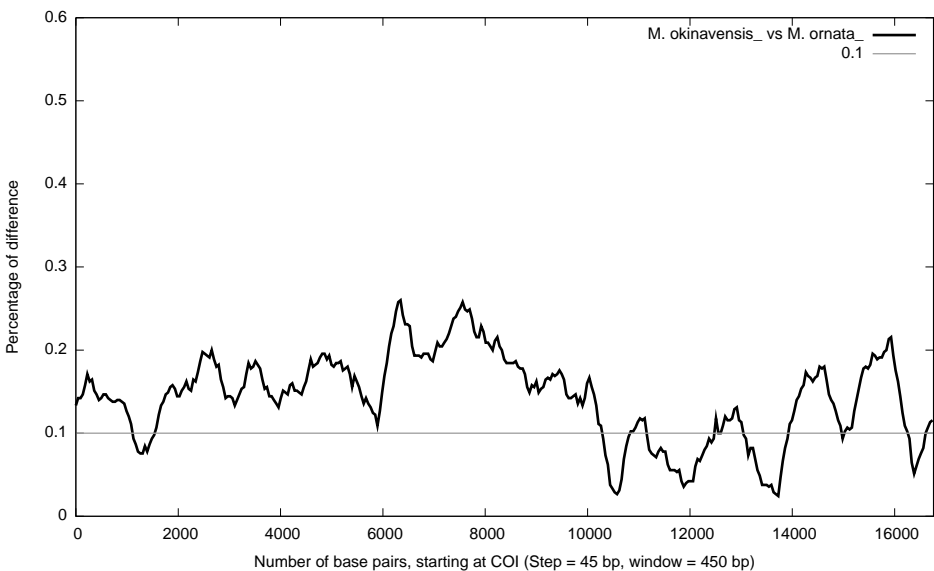

Supplement: S3 (10.1371/journal.pone.0051263.s003) [file journal.pone.0051263.s003]

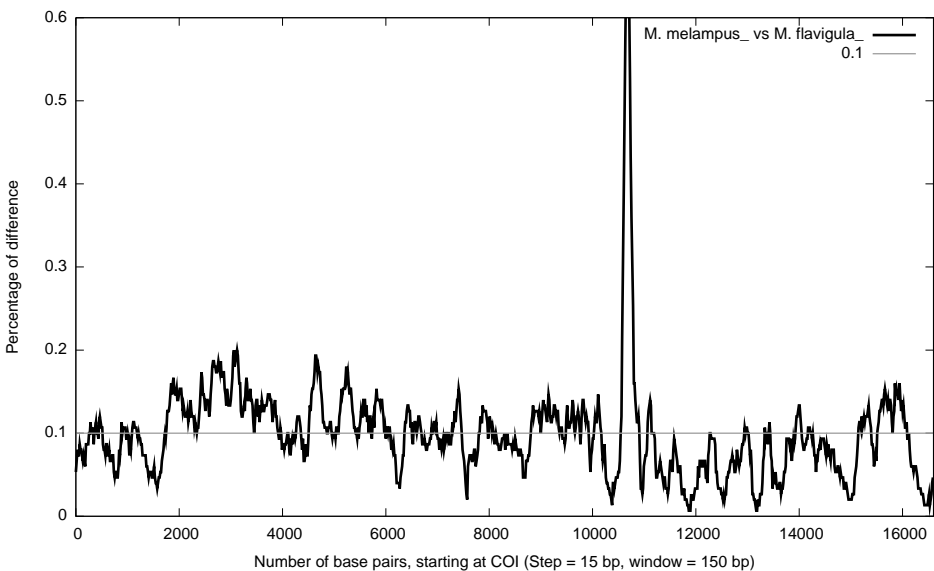

Supplement: S3 (10.1371/journal.pone.0051263.s003) [file journal.pone.0051263.s003]

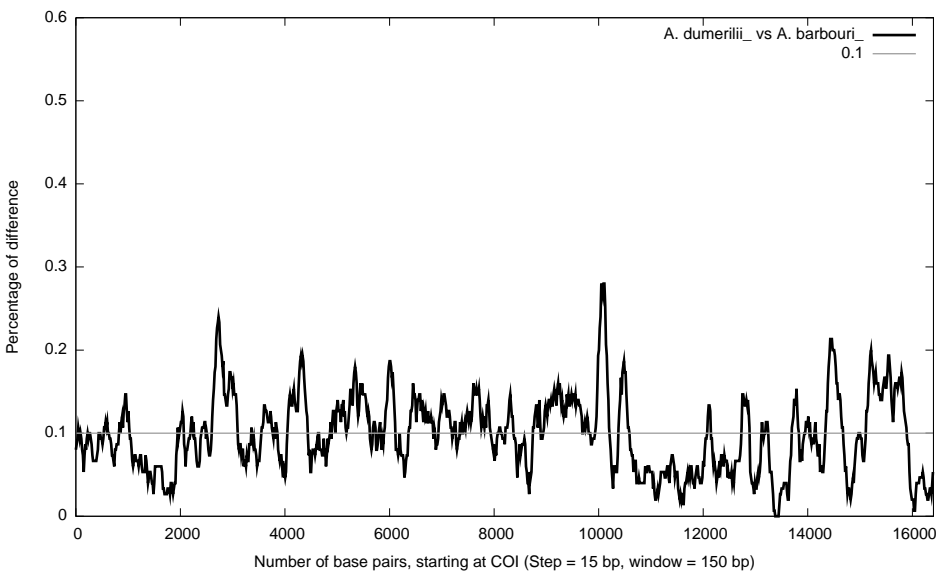

Supplement: S3 (10.1371/journal.pone.0051263.s003) [file journal.pone.0051263.s003]

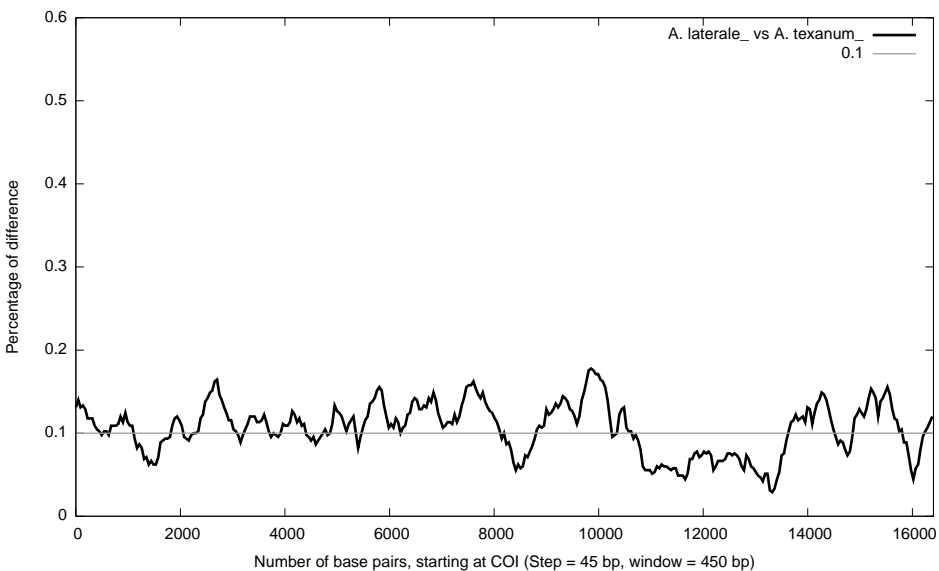

Supplement: S3 (10.1371/journal.pone.0051263.s003) [file journal.pone.0051263.s003]

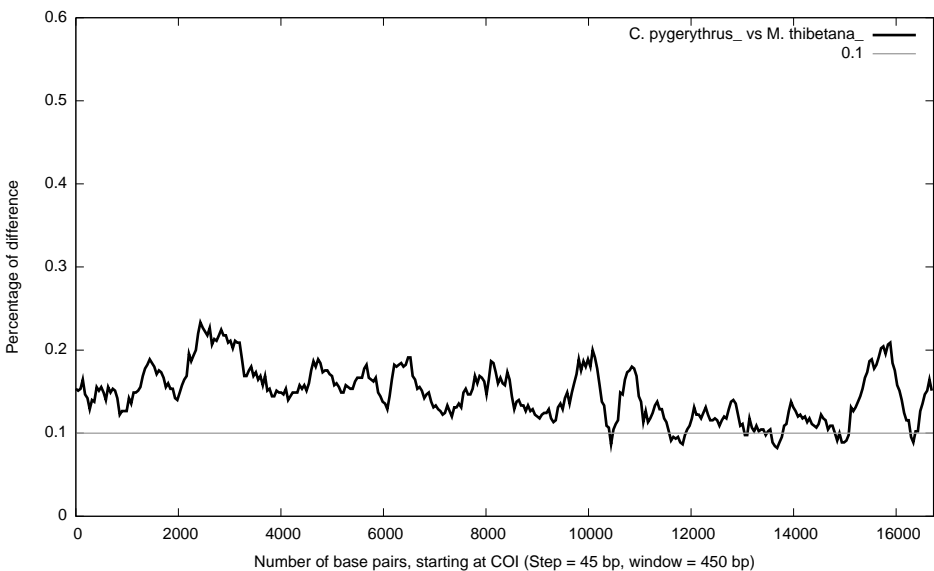

Supplement: S3 (10.1371/journal.pone.0051263.s003) [file journal.pone.0051263.s003]

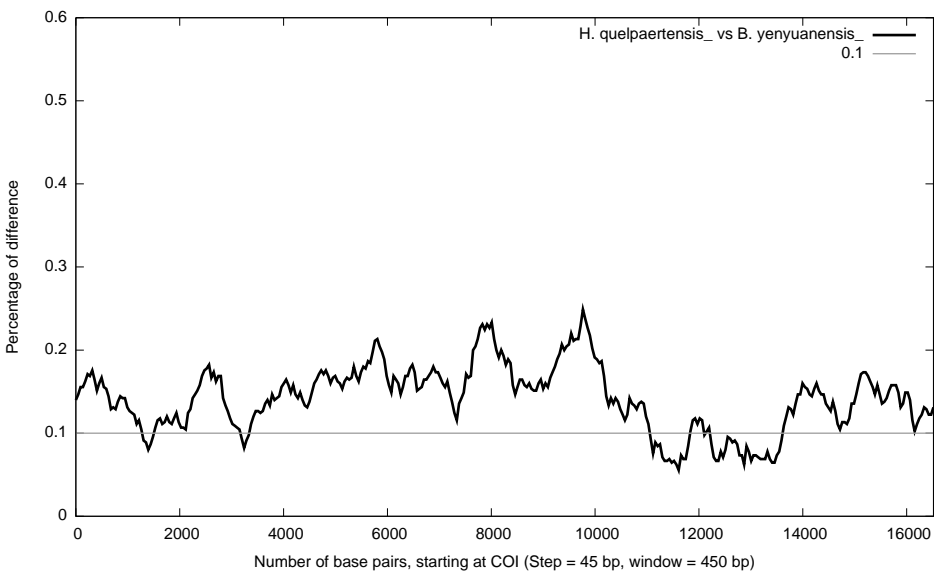

Supplement: S3 (10.1371/journal.pone.0051263.s003) [file journal.pone.0051263.s003]

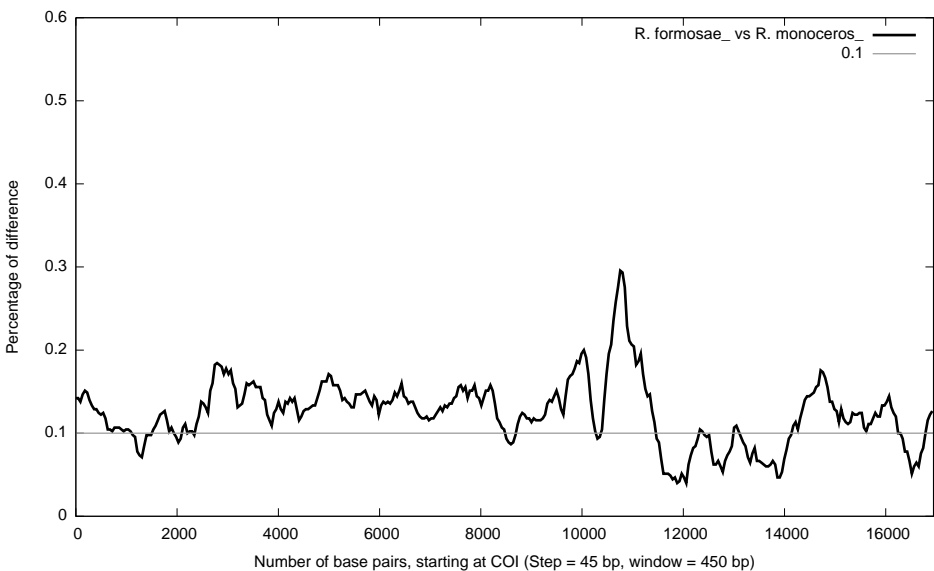

Supplement: S3 (10.1371/journal.pone.0051263.s003) [file journal.pone.0051263.s003]

# Rhinocerotidae

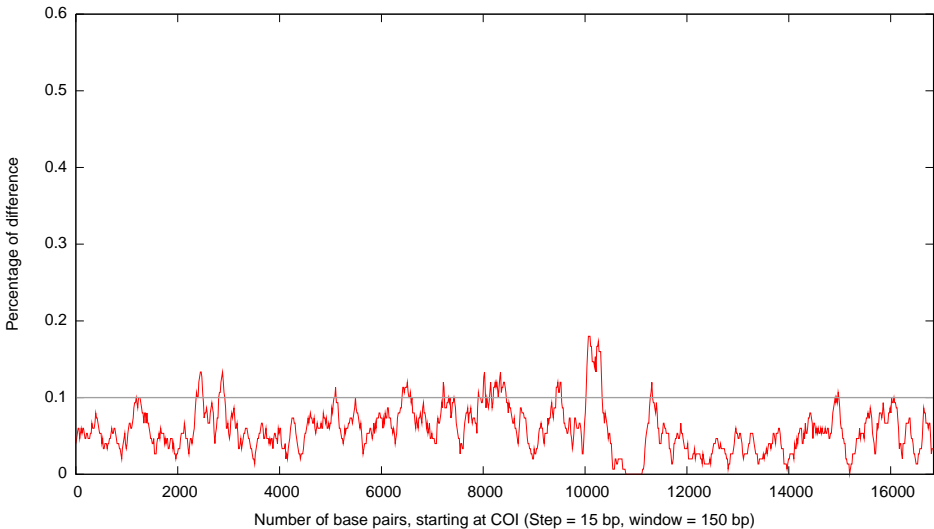

Supplement: S3 (10.1371/journal.pone.0051263.s003) [file journal.pone.0051263.s003]

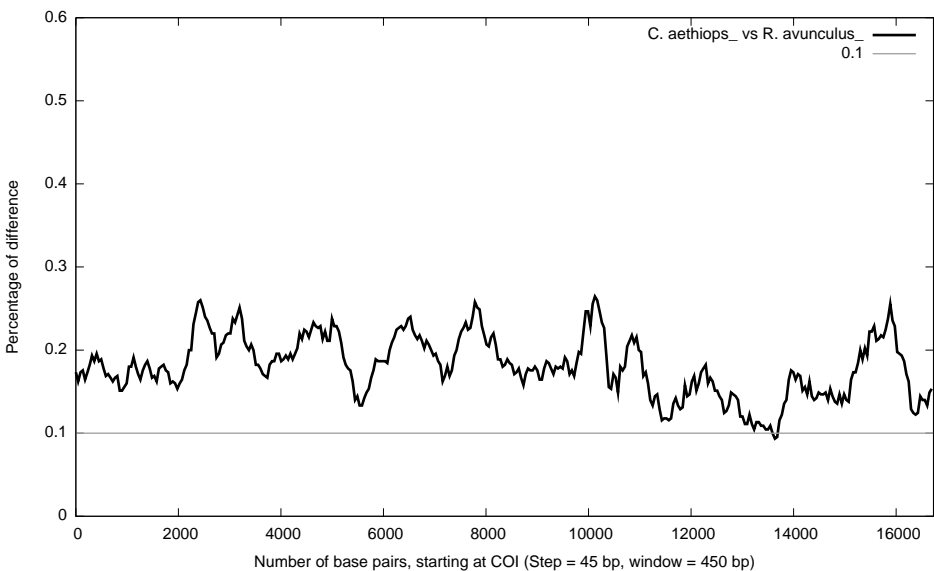

Supplement: S3 (10.1371/journal.pone.0051263.s003) [file journal.pone.0051263.s003]

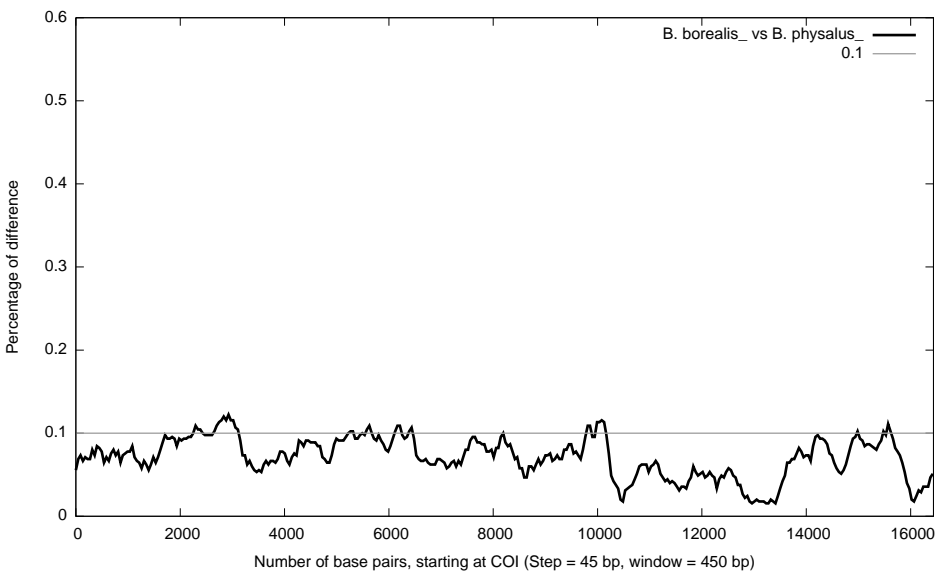

Supplement: S3 (10.1371/journal.pone.0051263.s003) [file journal.pone.0051263.s003]

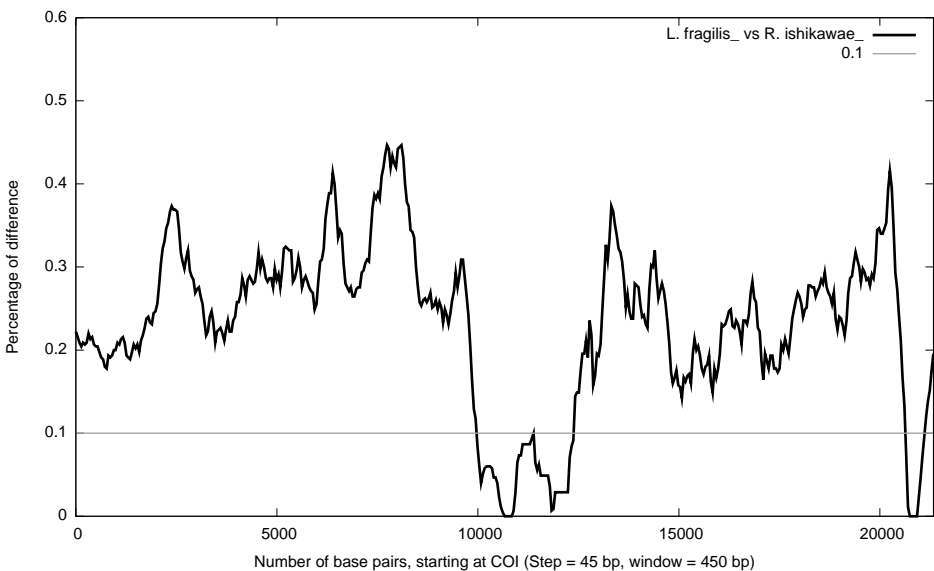

Supplement: S3 (10.1371/journal.pone.0051263.s003) [file journal.pone.0051263.s003]

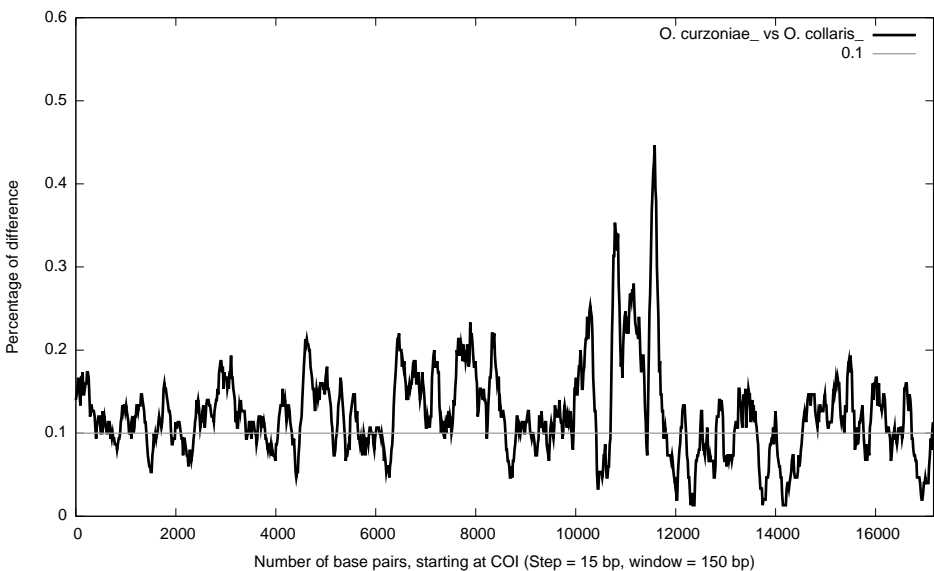

Supplement: S3 (10.1371/journal.pone.0051263.s003) [file journal.pone.0051263.s003]

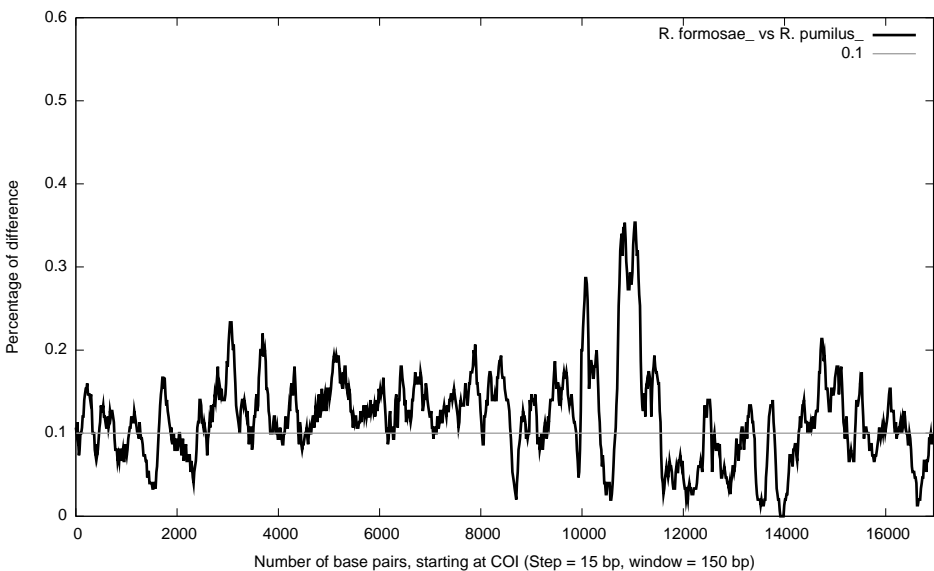

Supplement: S3 (10.1371/journal.pone.0051263.s003) [file journal.pone.0051263.s003]

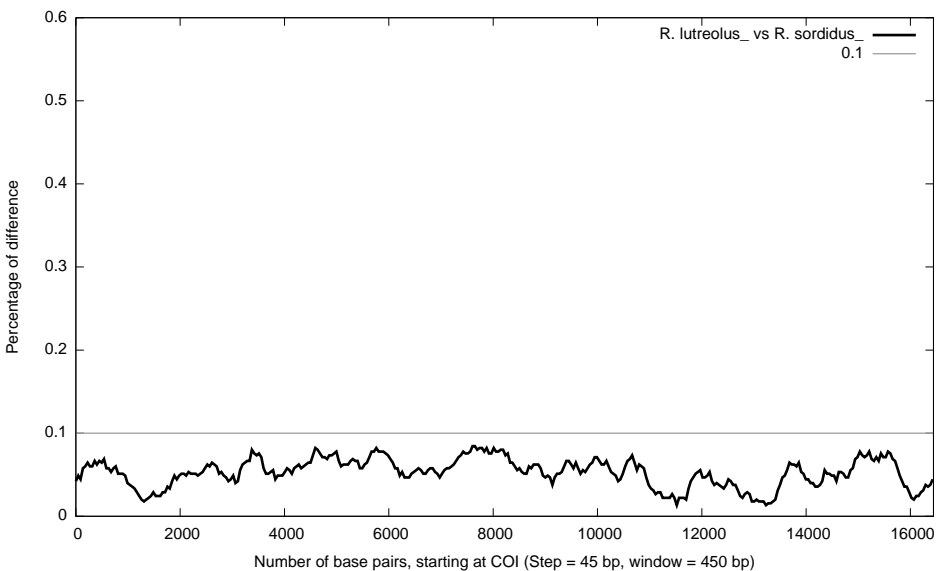

Supplement: S3 (10.1371/journal.pone.0051263.s003) [file journal.pone.0051263.s003]

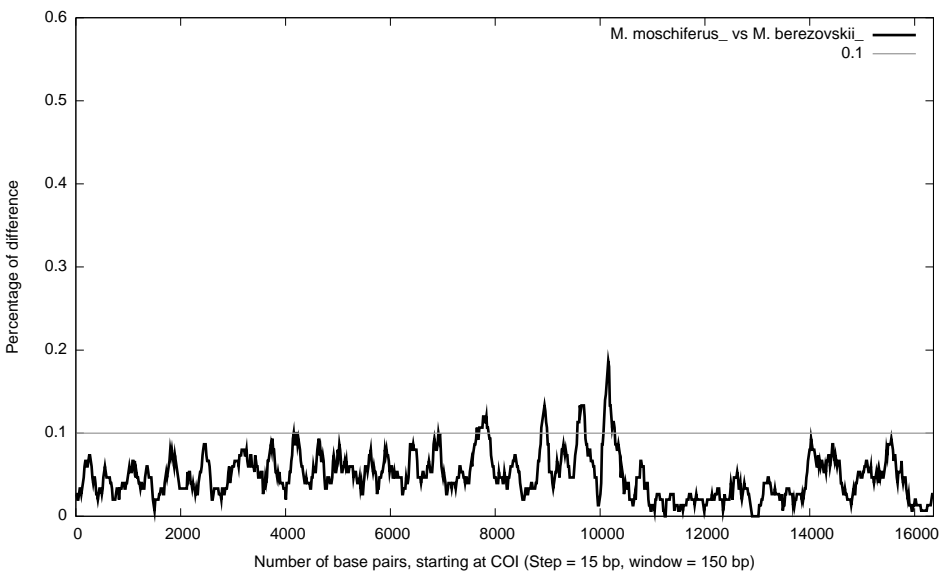

Supplement: S3 (10.1371/journal.pone.0051263.s003) [file journal.pone.0051263.s003]

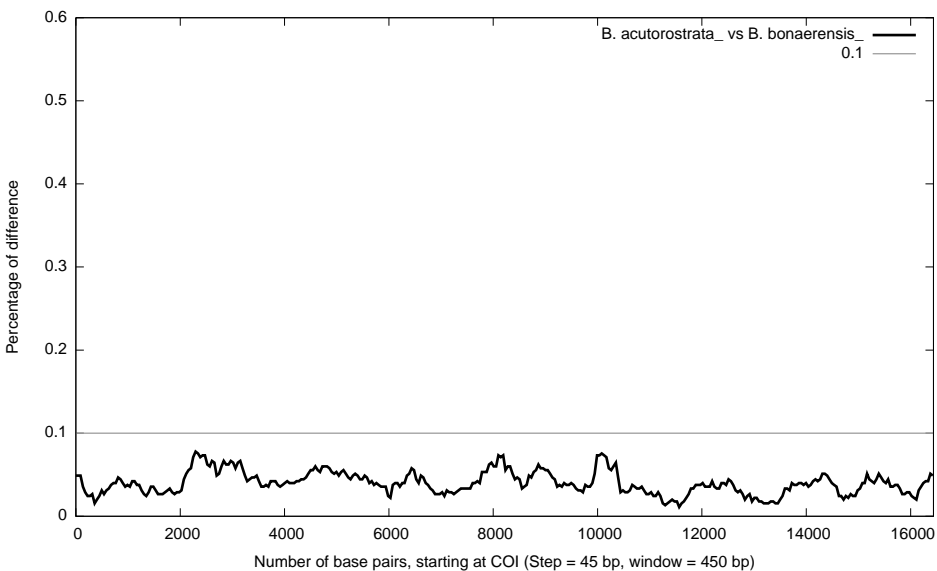

Supplement: S3 (10.1371/journal.pone.0051263.s003) [file journal.pone.0051263.s003]

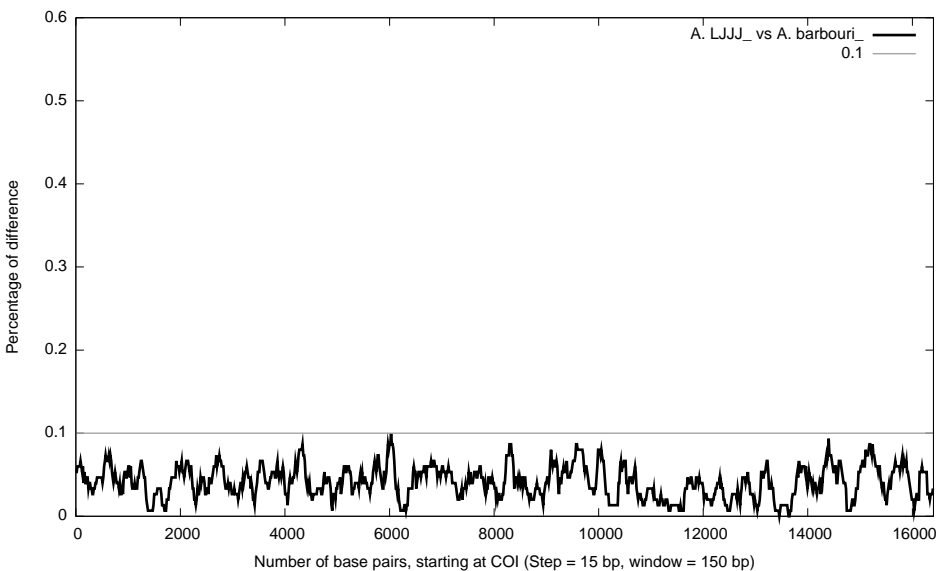

Supplement: S3 (10.1371/journal.pone.0051263.s003) [file journal.pone.0051263.s003]

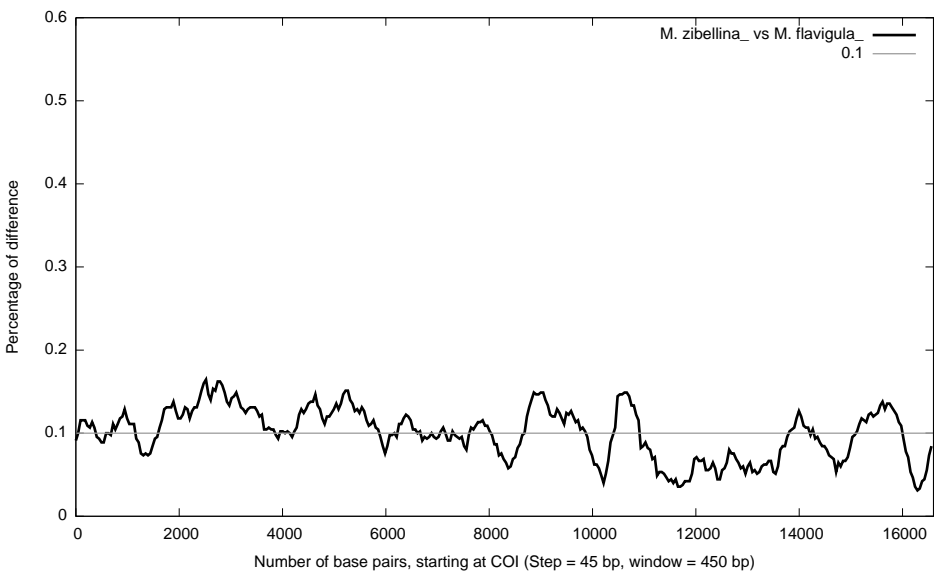

Supplement: S3 (10.1371/journal.pone.0051263.s003) [file journal.pone.0051263.s003]

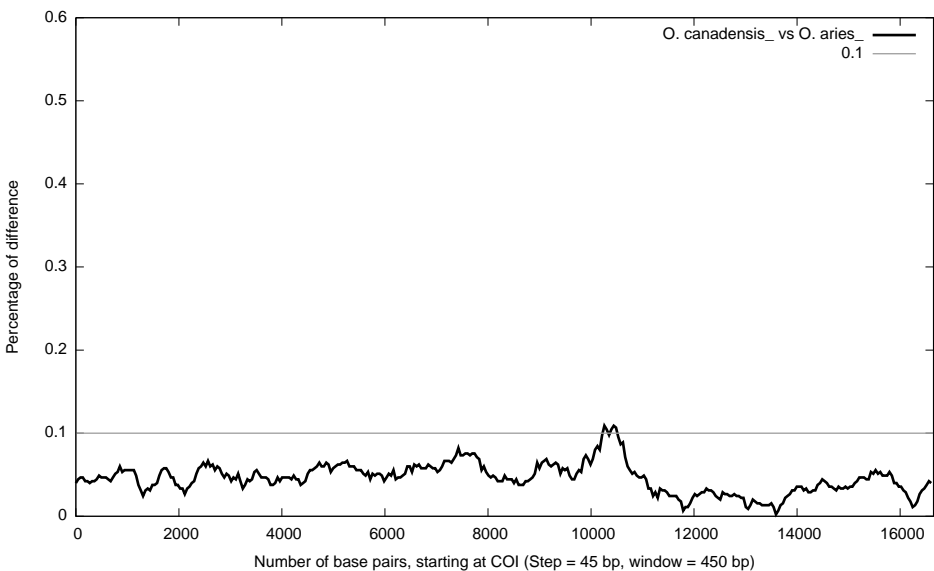

Supplement: S3 (10.1371/journal.pone.0051263.s003) [file journal.pone.0051263.s003]

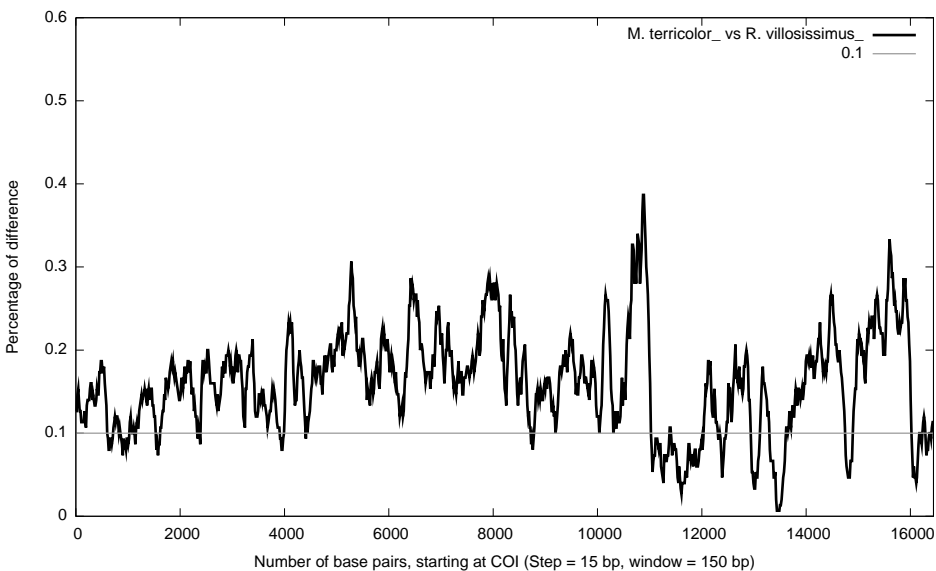

Supplement: S3 (10.1371/journal.pone.0051263.s003) [file journal.pone.0051263.s003]

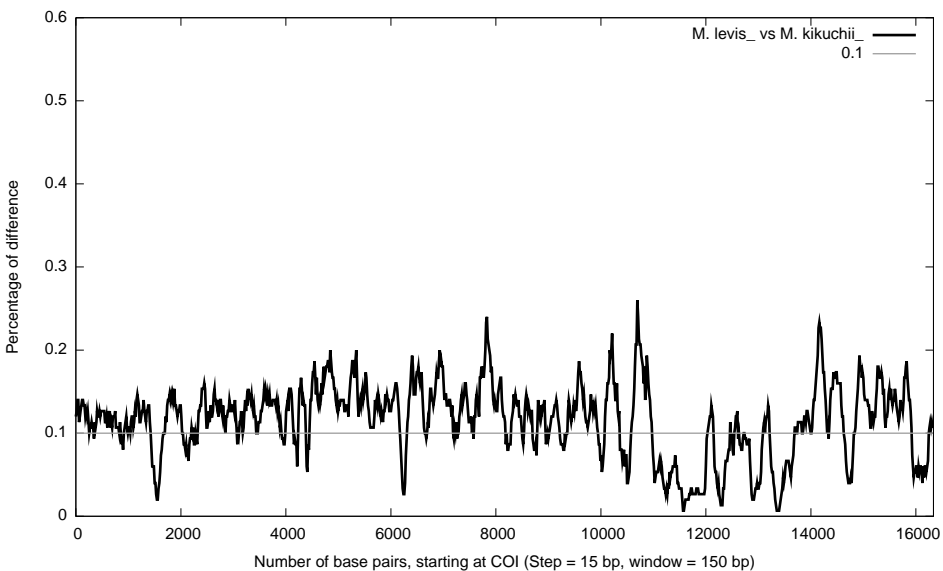

Supplement: S3 (10.1371/journal.pone.0051263.s003) [file journal.pone.0051263.s003]

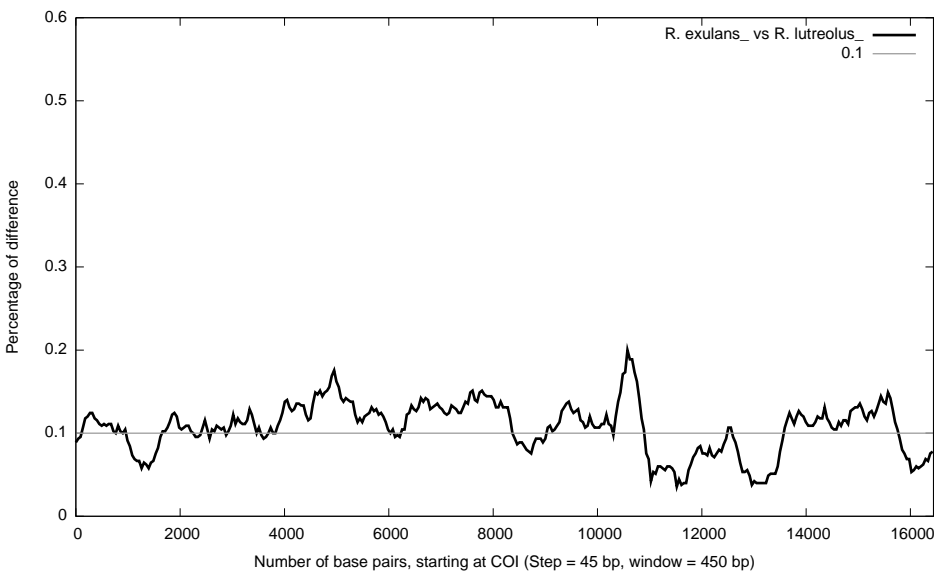

Supplement: S3 (10.1371/journal.pone.0051263.s003) [file journal.pone.0051263.s003]

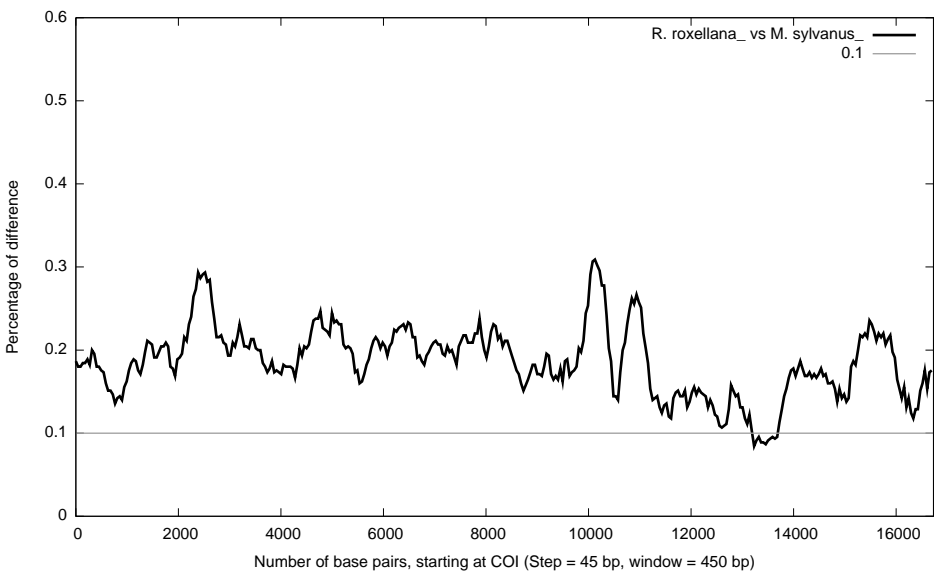

Supplement: S3 (10.1371/journal.pone.0051263.s003) [file journal.pone.0051263.s003]

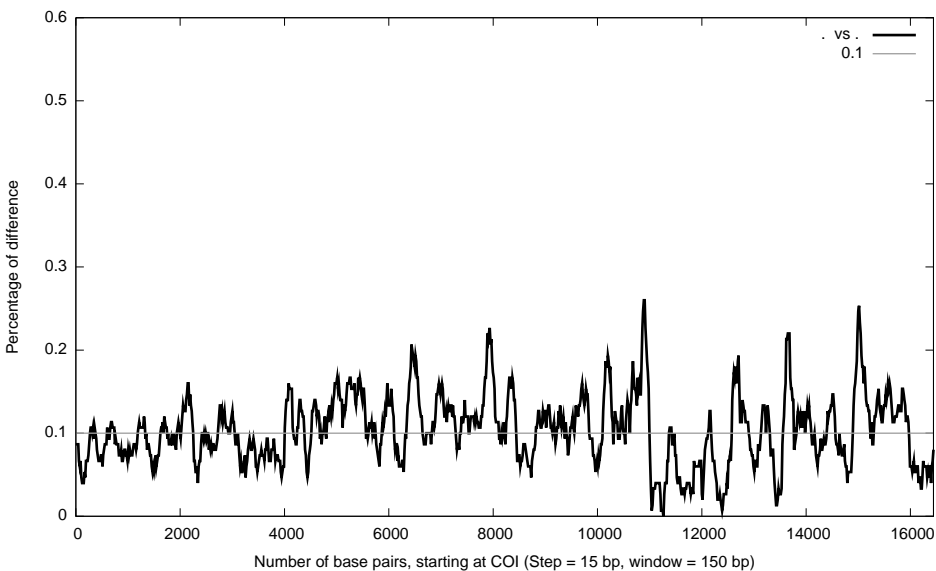

Supplement: S3 (10.1371/journal.pone.0051263.s003) [file journal.pone.0051263.s003]

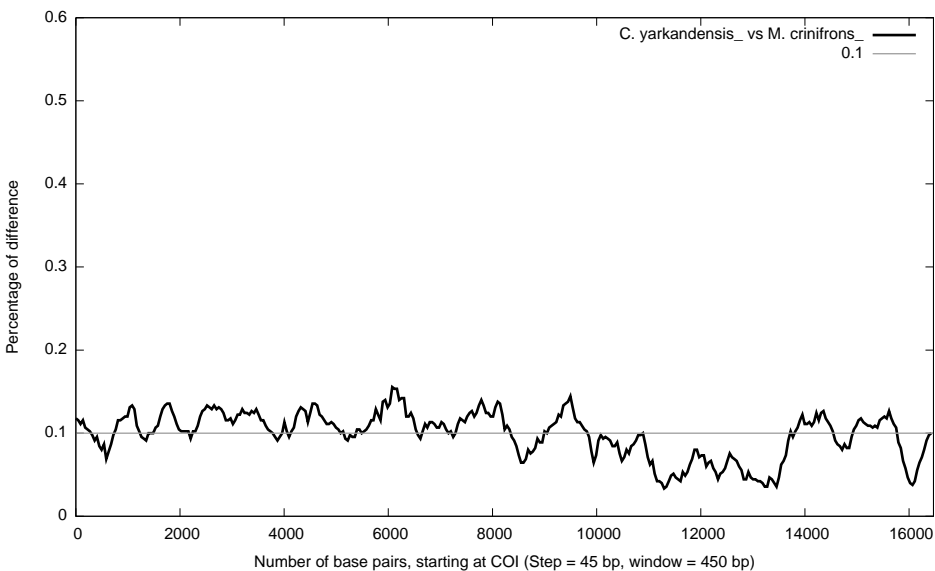

Supplement: S3 (10.1371/journal.pone.0051263.s003) [file journal.pone.0051263.s003]

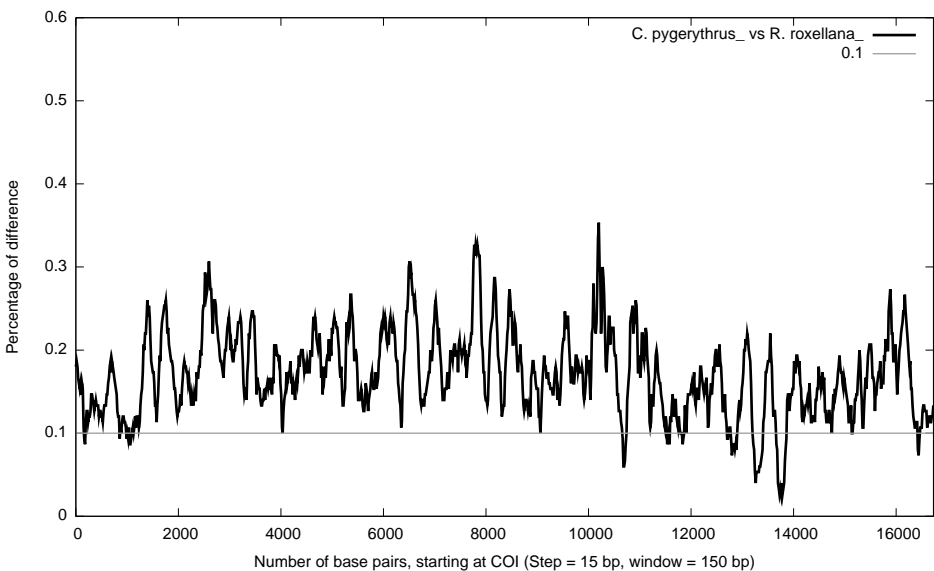

Supplement: S3 (10.1371/journal.pone.0051263.s003) [file journal.pone.0051263.s003]

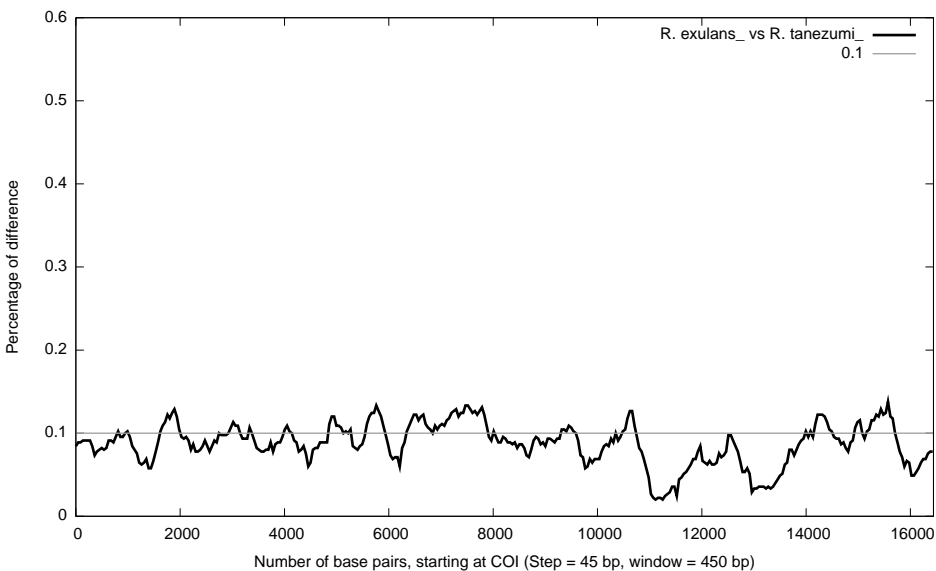

Supplement: S3 (10.1371/journal.pone.0051263.s003) [file journal.pone.0051263.s003]

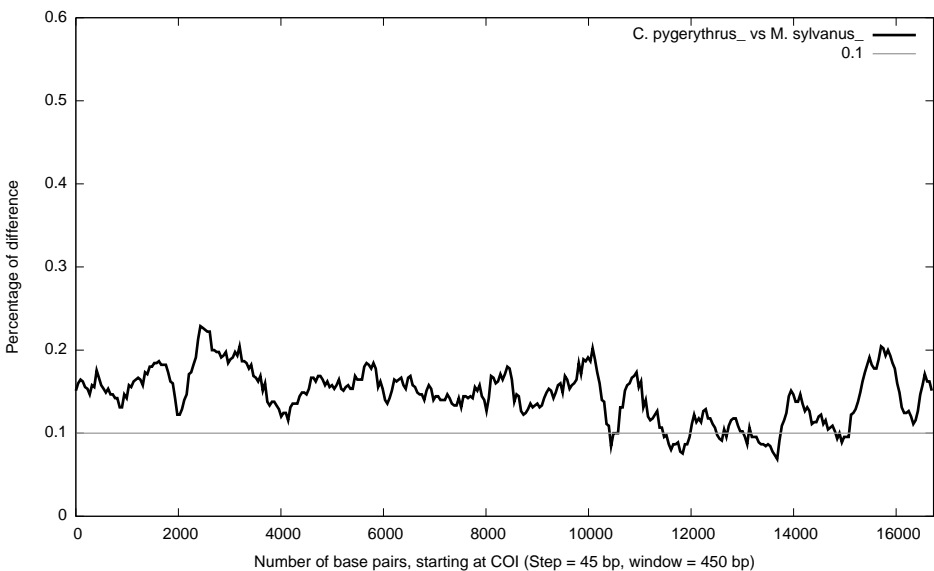

Supplement: S3 (10.1371/journal.pone.0051263.s003) [file journal.pone.0051263.s003]

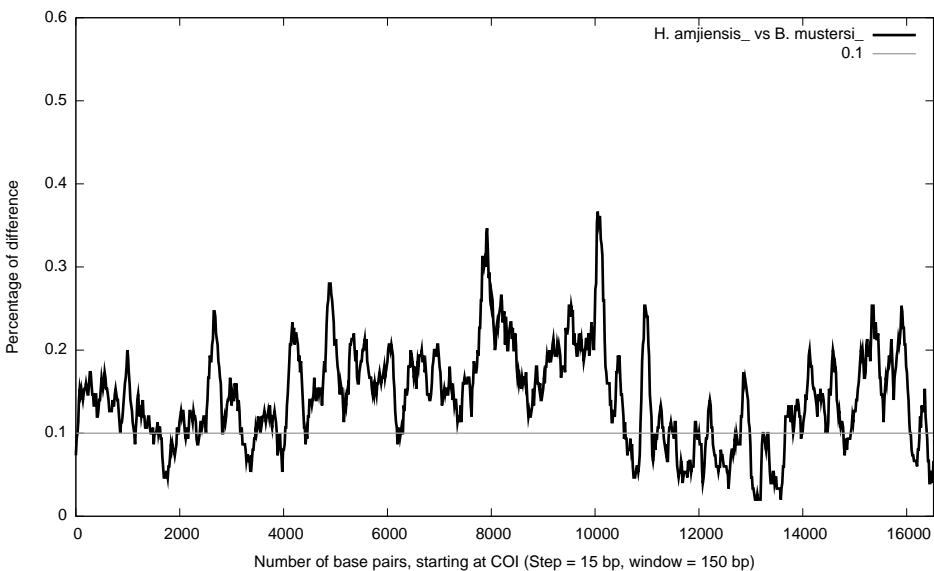

Supplement: S3 (10.1371/journal.pone.0051263.s003) [file journal.pone.0051263.s003]

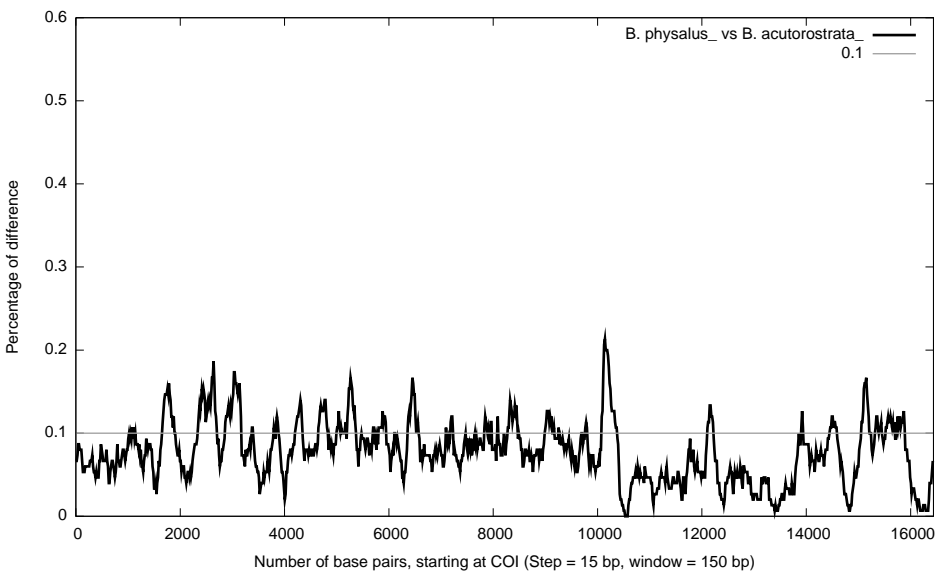

Supplement: S3 (10.1371/journal.pone.0051263.s003) [file journal.pone.0051263.s003]

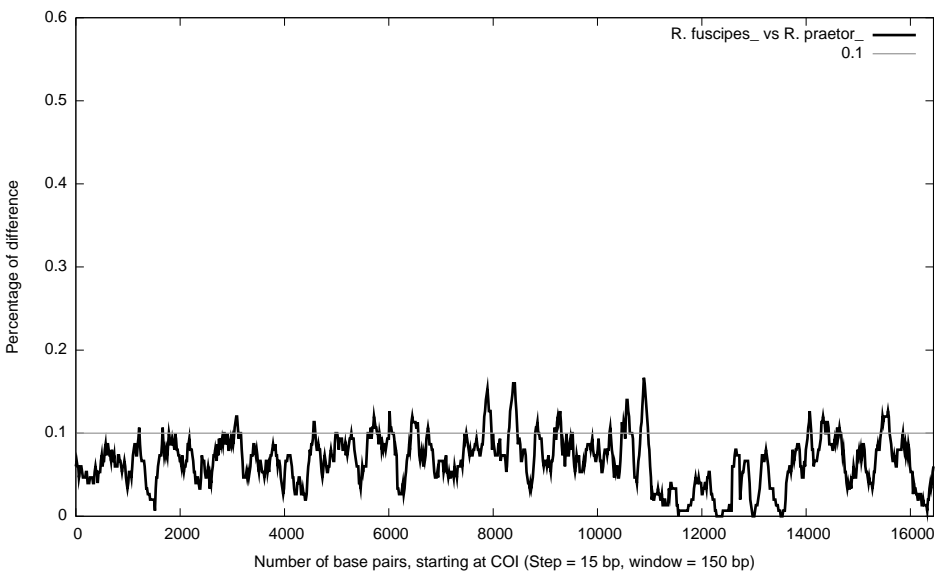

Supplement: S3 (10.1371/journal.pone.0051263.s003) [file journal.pone.0051263.s003]

# Cryptobranchidae

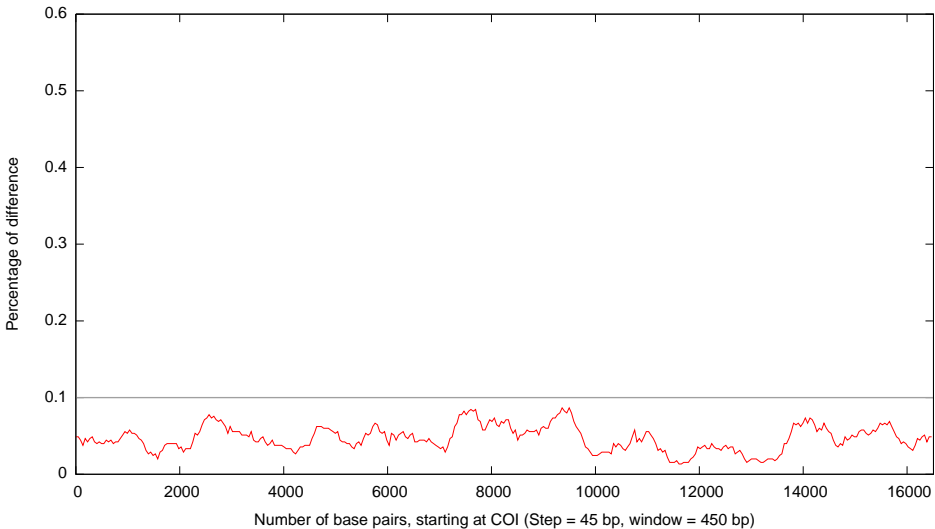

Supplement: S3 (10.1371/journal.pone.0051263.s003) [file journal.pone.0051263.s003]

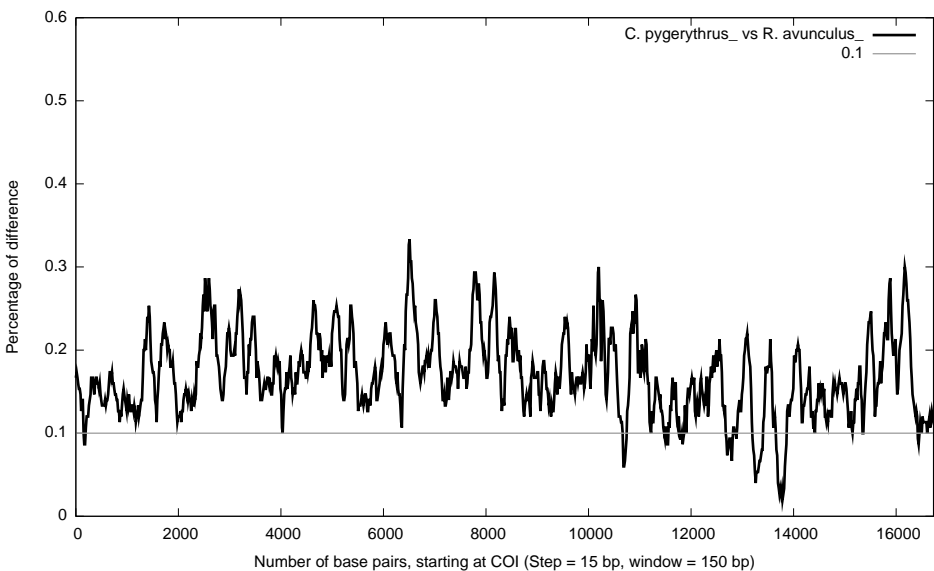

Supplement: S3 (10.1371/journal.pone.0051263.s003) [file journal.pone.0051263.s003]

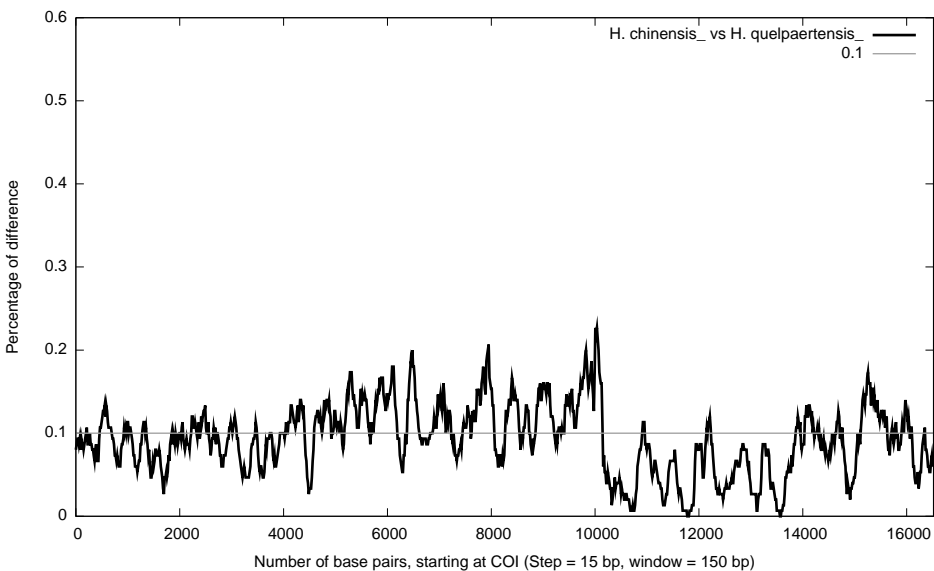

Supplement: S3 (10.1371/journal.pone.0051263.s003) [file journal.pone.0051263.s003]

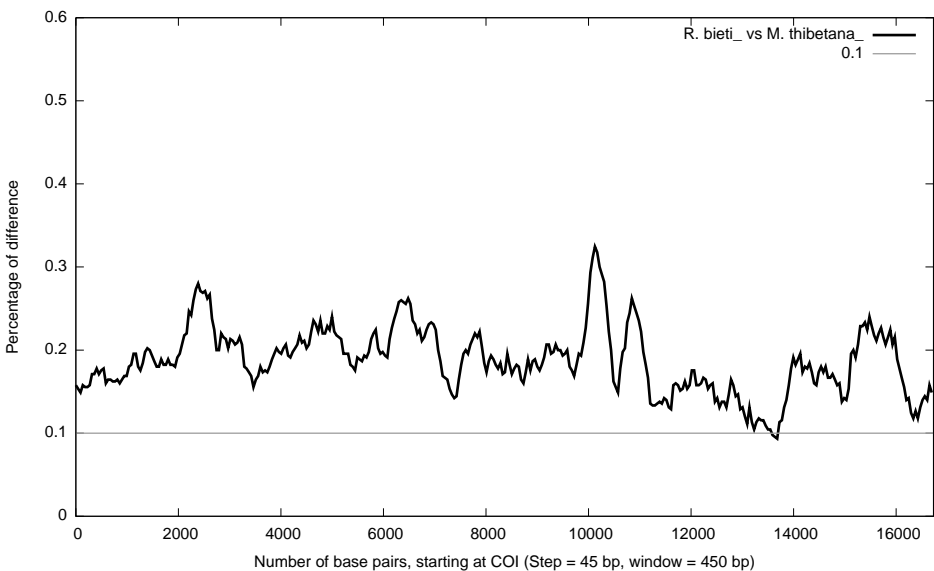

Supplement: S3 (10.1371/journal.pone.0051263.s003) [file journal.pone.0051263.s003]

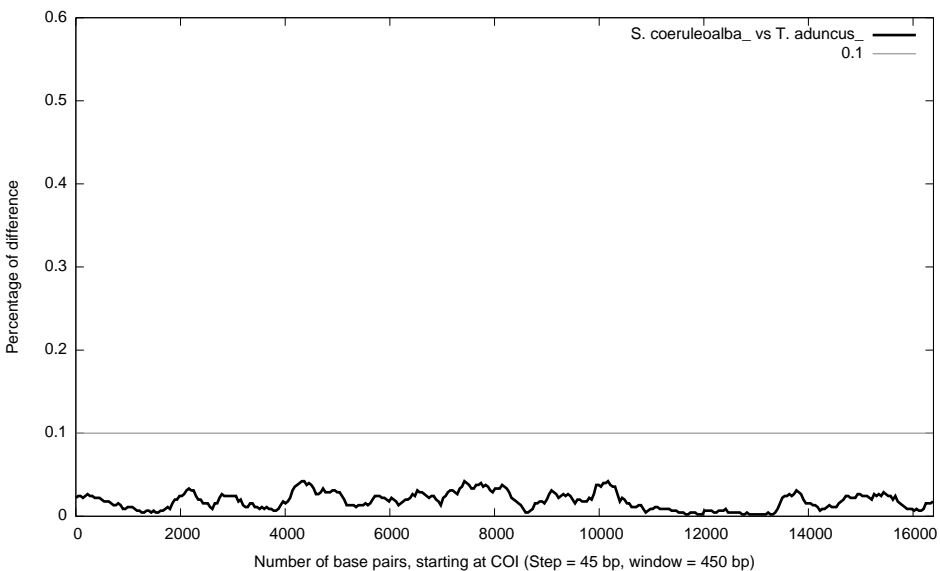

Supplement: S3 (10.1371/journal.pone.0051263.s003) [file journal.pone.0051263.s003]

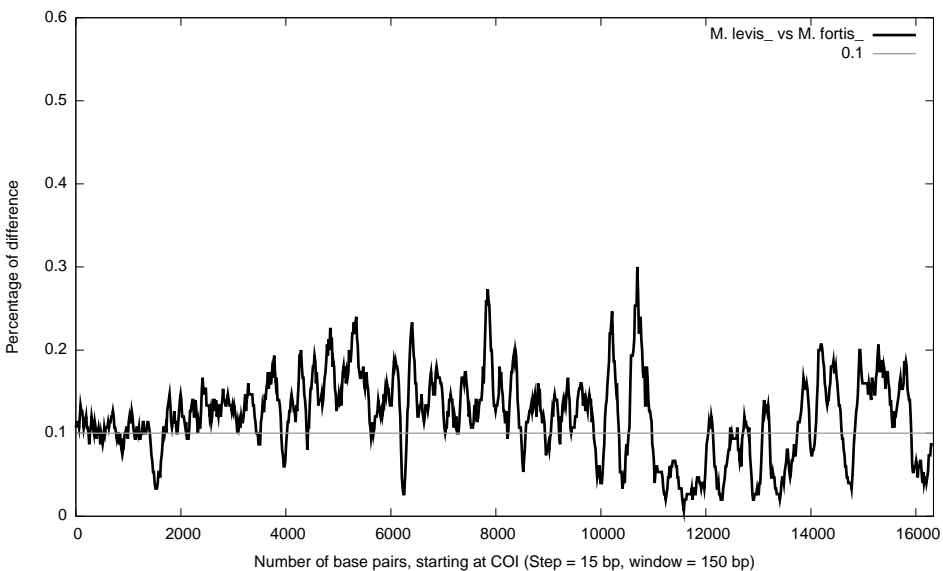

Supplement: S3 (10.1371/journal.pone.0051263.s003) [file journal.pone.0051263.s003]

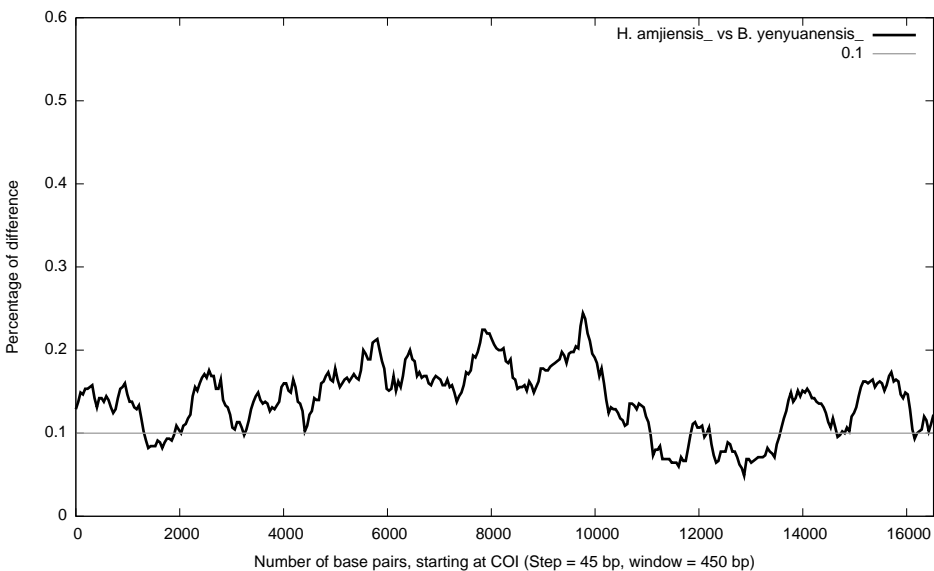

Supplement: S3 (10.1371/journal.pone.0051263.s003) [file journal.pone.0051263.s003]

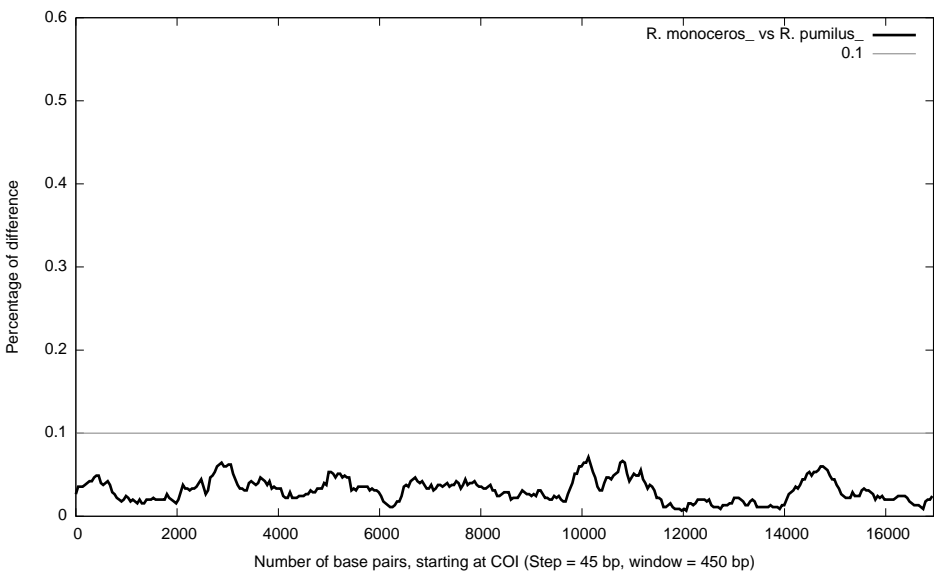

Supplement: S3 (10.1371/journal.pone.0051263.s003) [file journal.pone.0051263.s003]

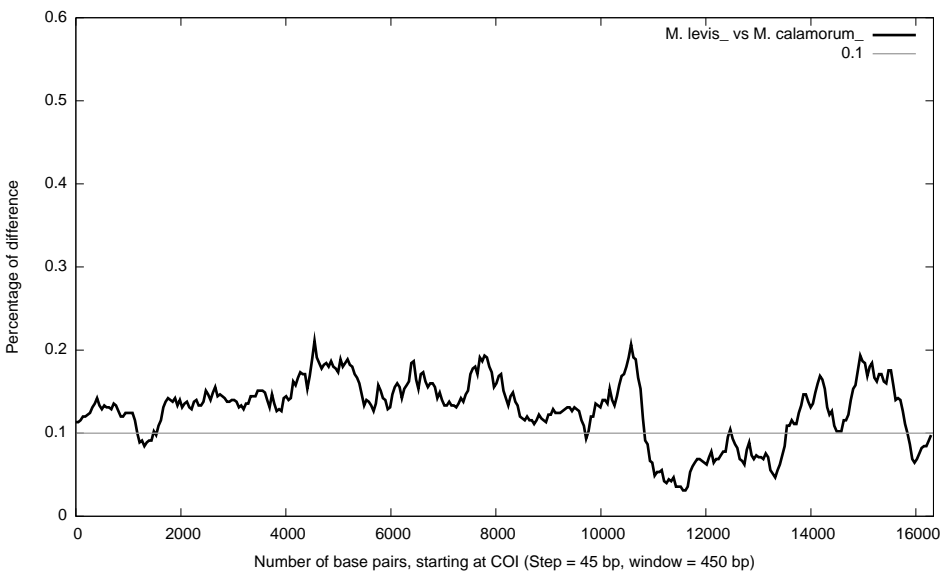

Supplement: S3 (10.1371/journal.pone.0051263.s003) [file journal.pone.0051263.s003]

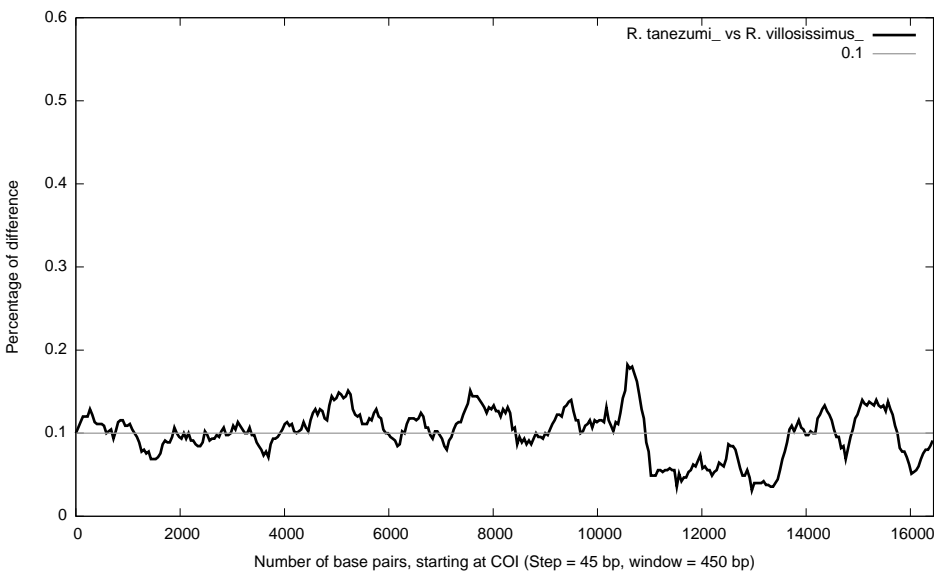

Supplement: S3 (10.1371/journal.pone.0051263.s003) [file journal.pone.0051263.s003]

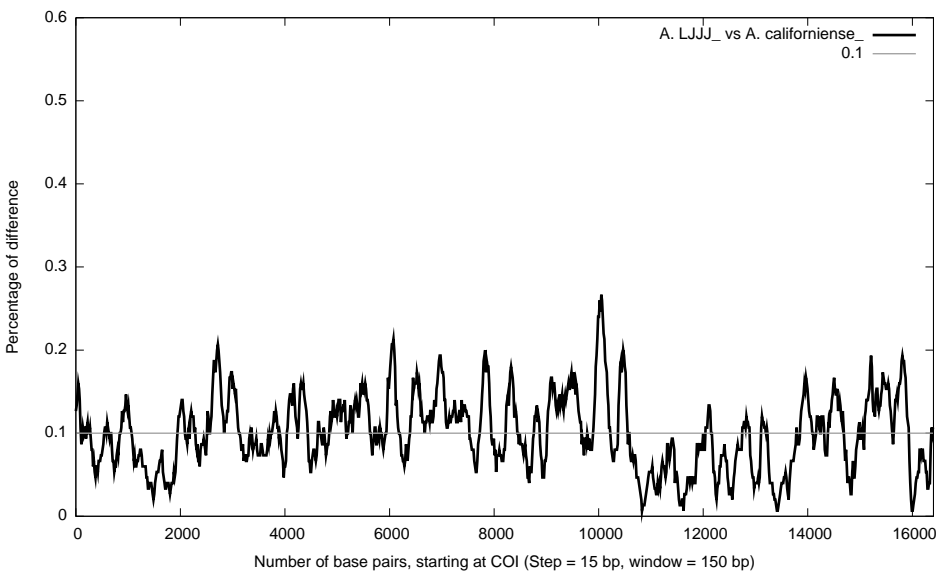

Supplement: S3 (10.1371/journal.pone.0051263.s003) [file journal.pone.0051263.s003]

# Salamandridae

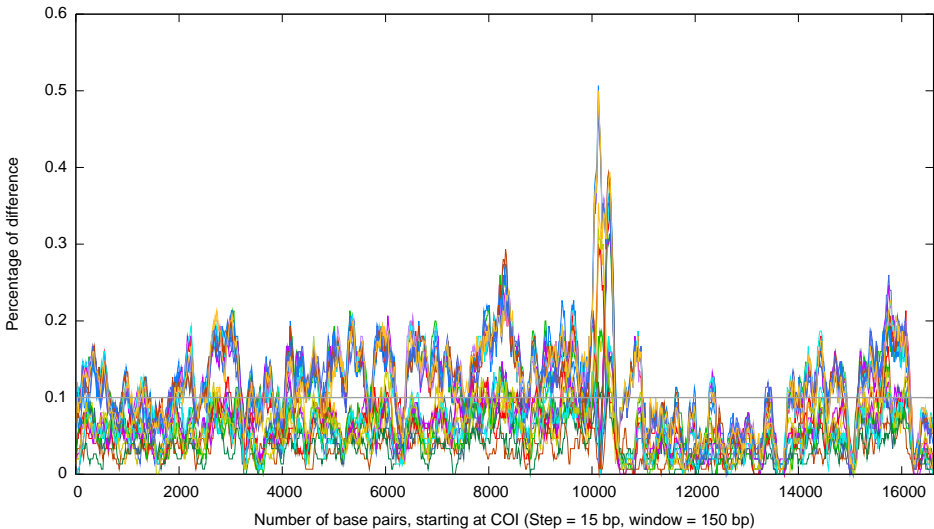

Supplement: S3 (10.1371/journal.pone.0051263.s003) [file journal.pone.0051263.s003]

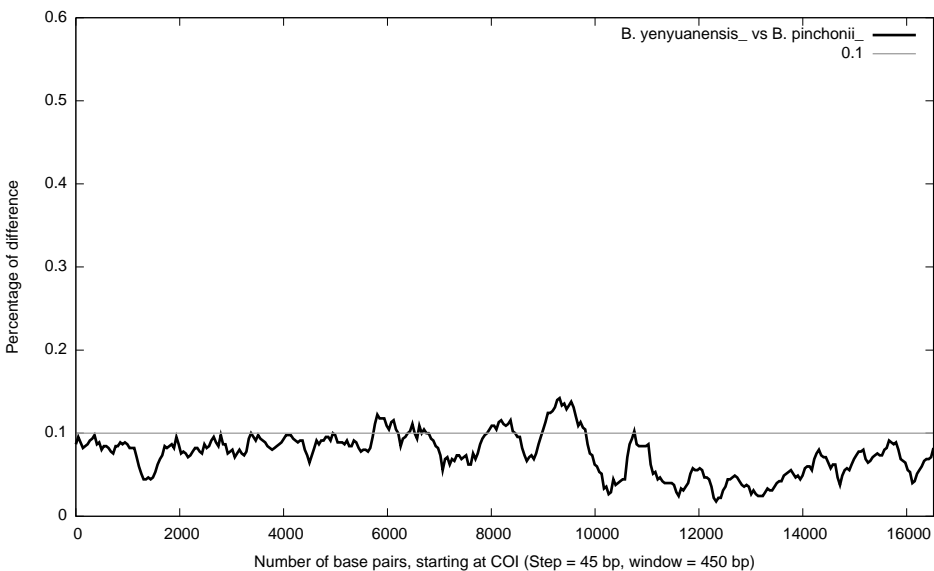

Supplement: S3 (10.1371/journal.pone.0051263.s003) [file journal.pone.0051263.s003]

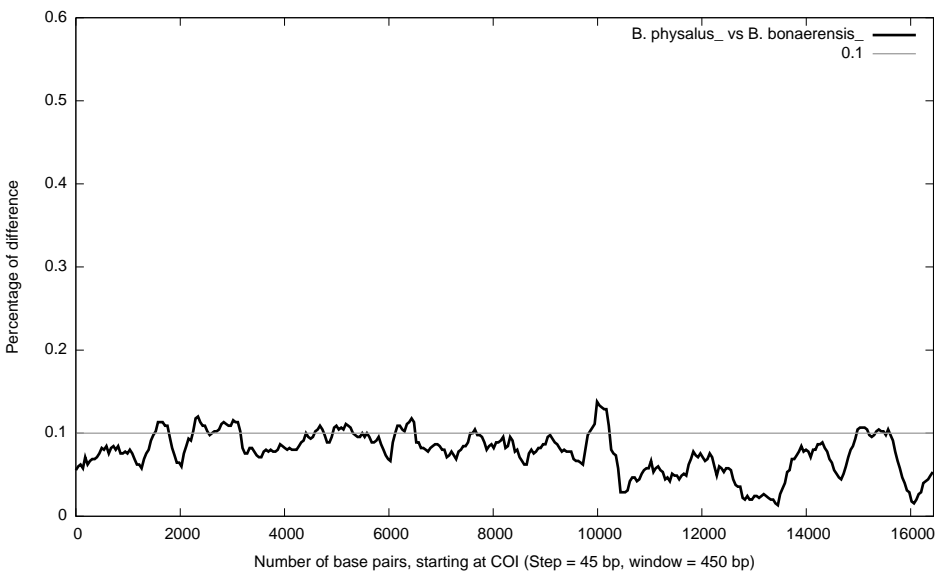

Supplement: S3 (10.1371/journal.pone.0051263.s003) [file journal.pone.0051263.s003]

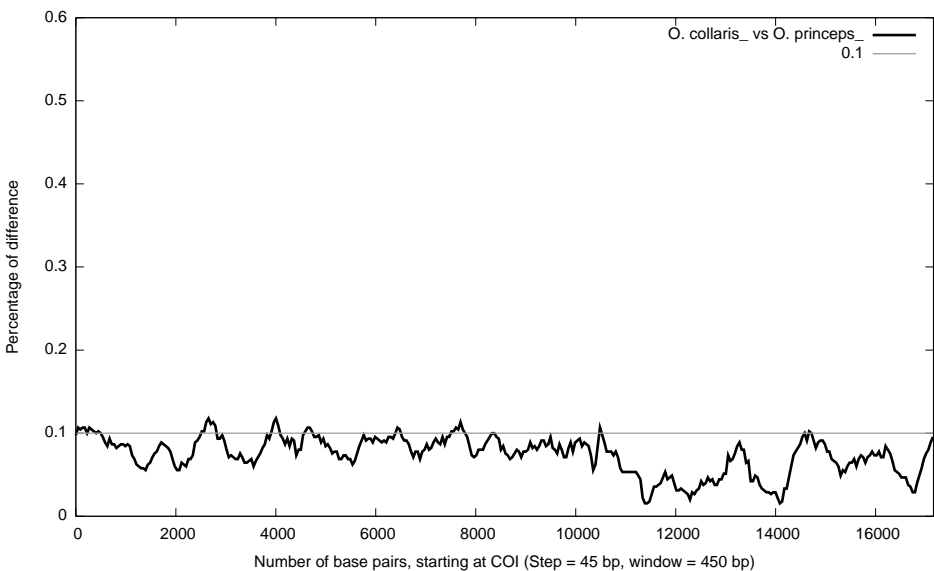

Supplement: S3 (10.1371/journal.pone.0051263.s003) [file journal.pone.0051263.s003]

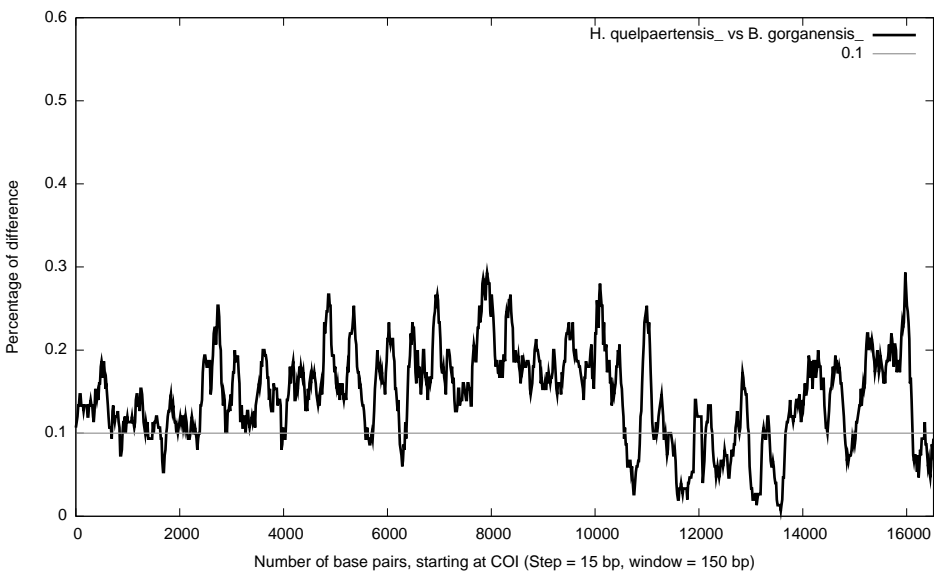

Supplement: S3 (10.1371/journal.pone.0051263.s003) [file journal.pone.0051263.s003]

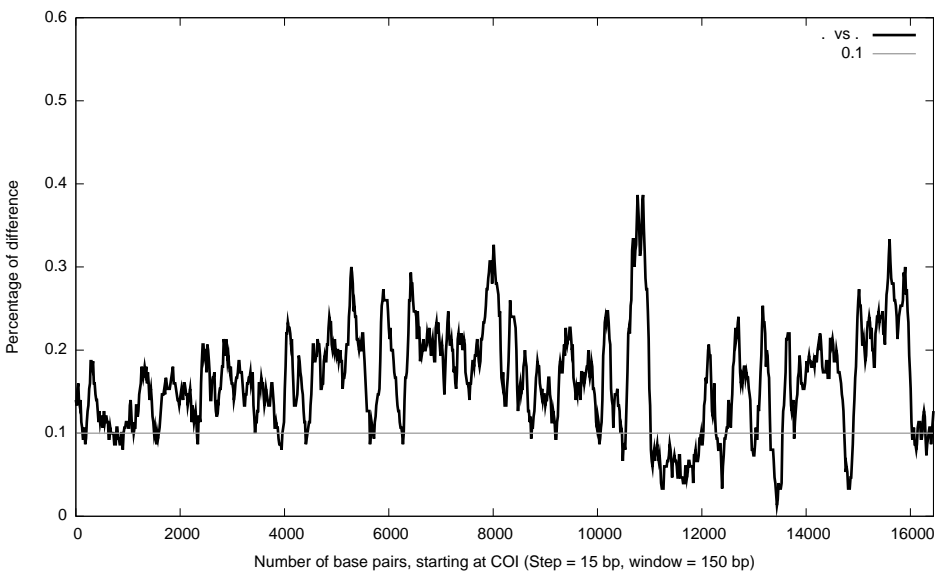

Supplement: S3 (10.1371/journal.pone.0051263.s003) [file journal.pone.0051263.s003]

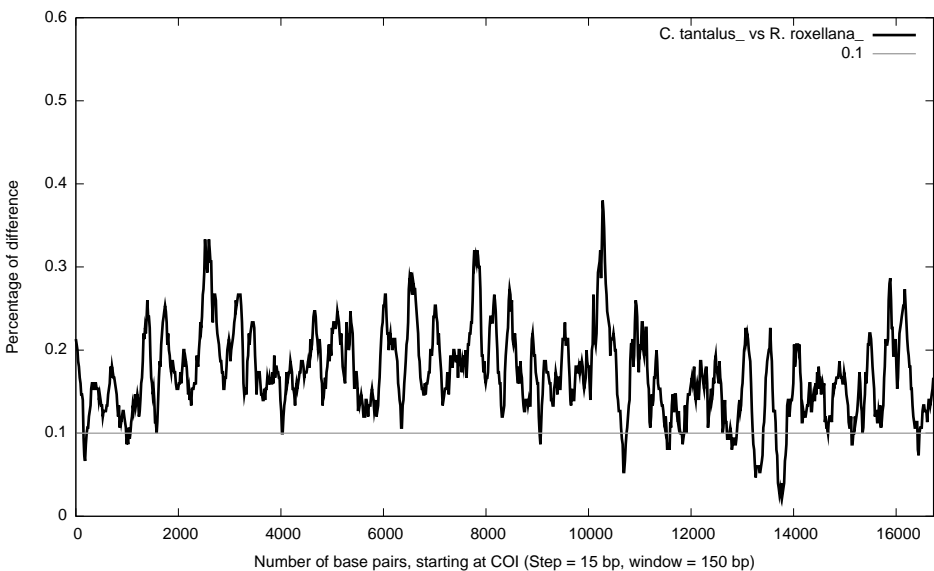

Supplement: S3 (10.1371/journal.pone.0051263.s003) [file journal.pone.0051263.s003]

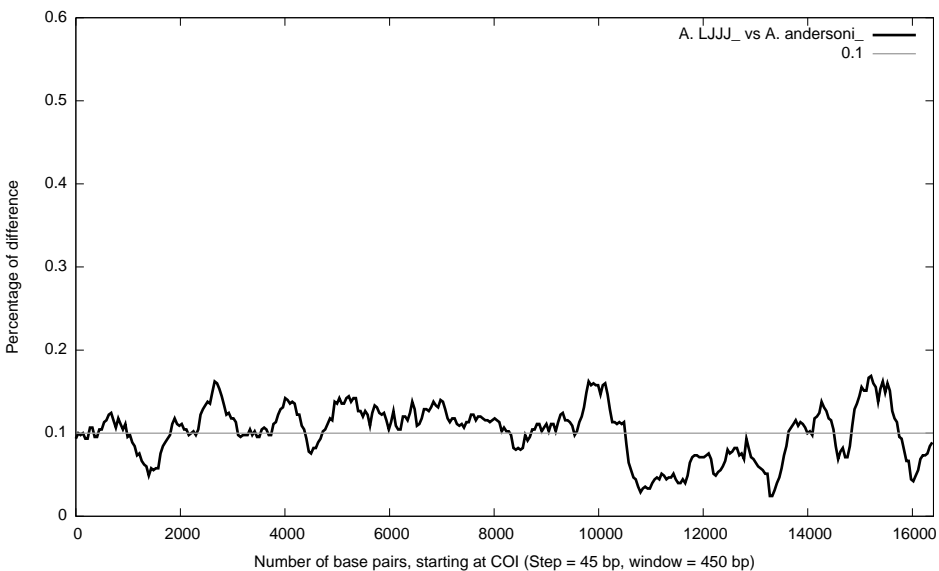

Supplement: S3 (10.1371/journal.pone.0051263.s003) [file journal.pone.0051263.s003]

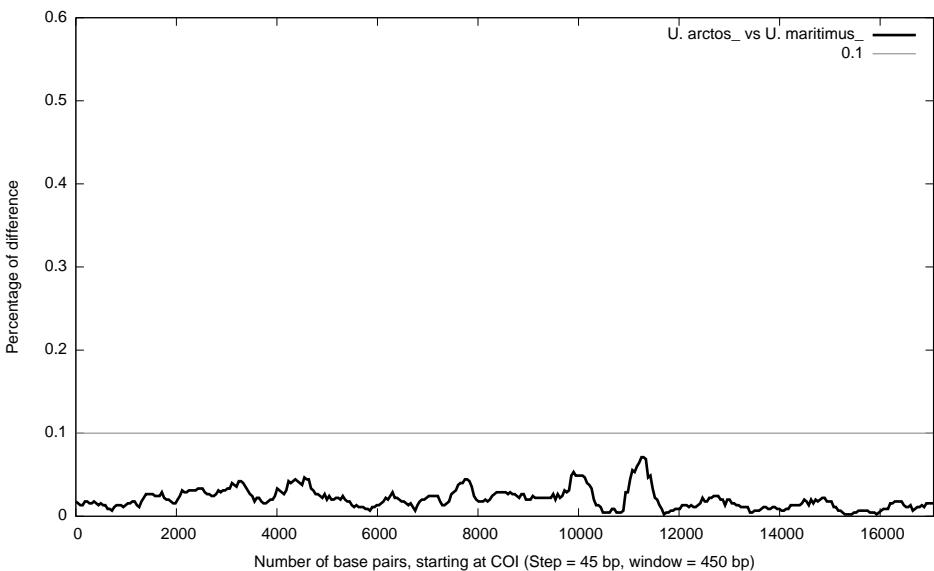

Supplement: S3 (10.1371/journal.pone.0051263.s003) [file journal.pone.0051263.s003]

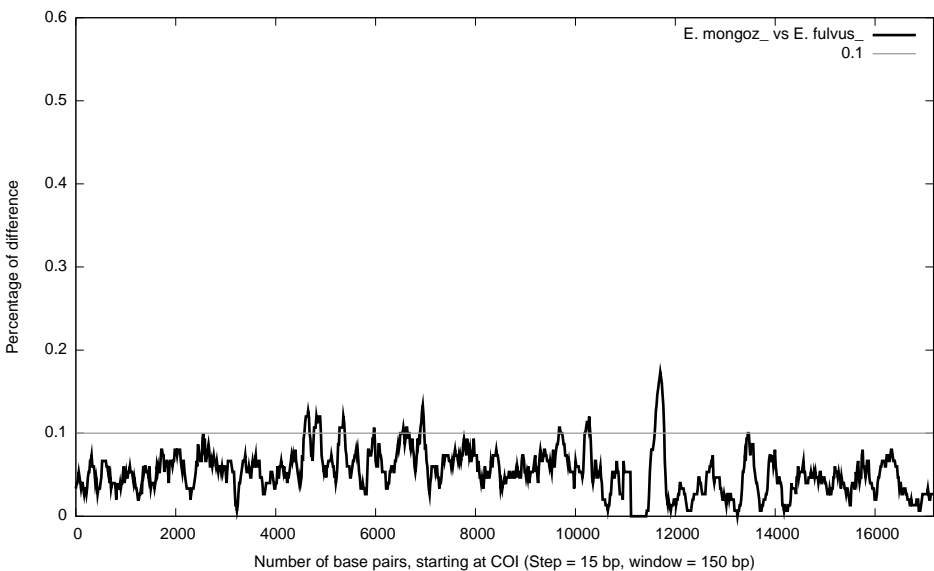

Supplement: S3 (10.1371/journal.pone.0051263.s003) [file journal.pone.0051263.s003]

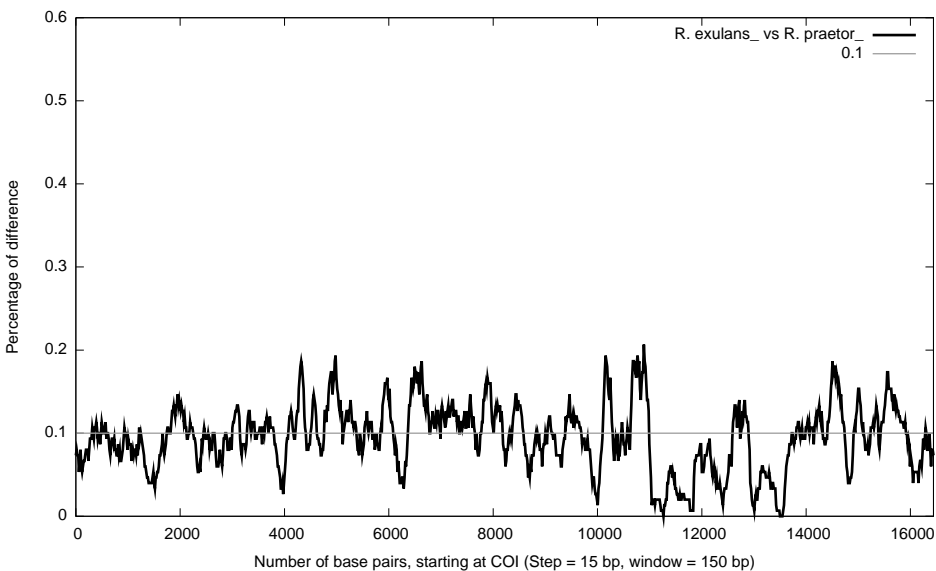

Supplement: S3 (10.1371/journal.pone.0051263.s003) [file journal.pone.0051263.s003]

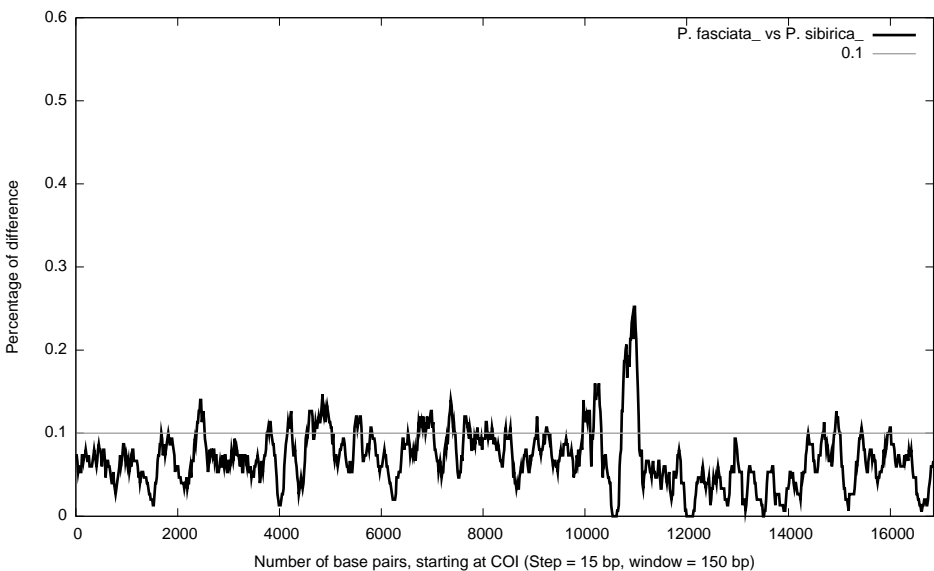

Supplement: S3 (10.1371/journal.pone.0051263.s003) [file journal.pone.0051263.s003]

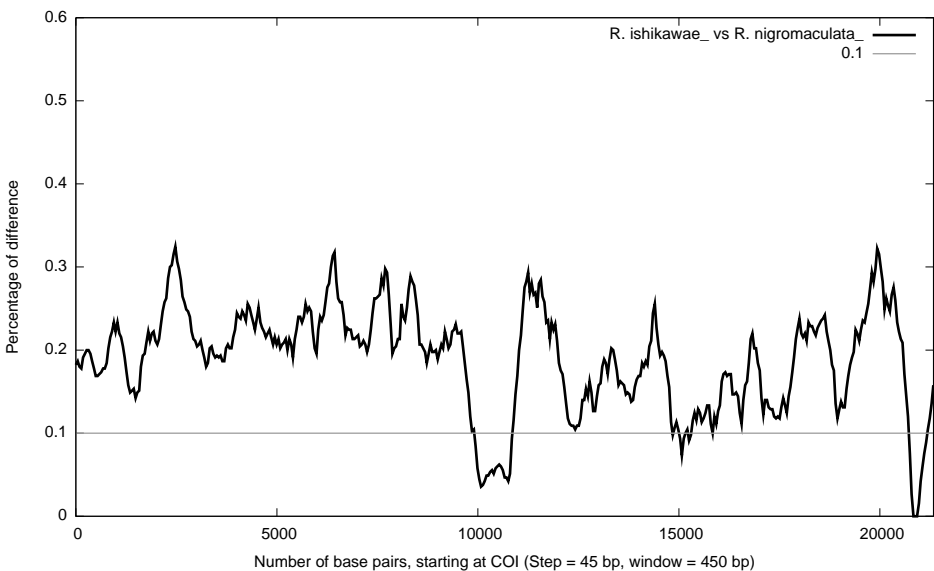

Supplement: S3 (10.1371/journal.pone.0051263.s003) [file journal.pone.0051263.s003]

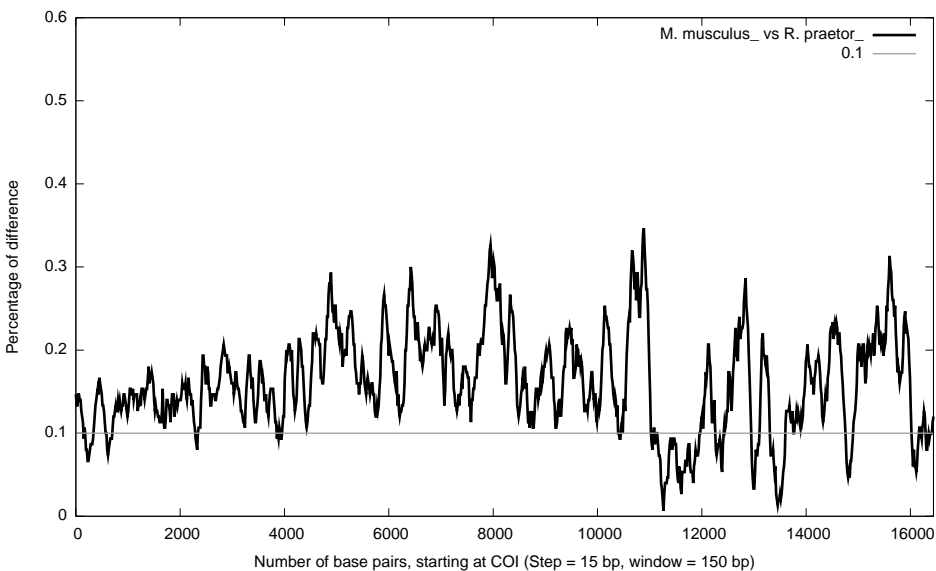

Supplement: S3 (10.1371/journal.pone.0051263.s003) [file journal.pone.0051263.s003]

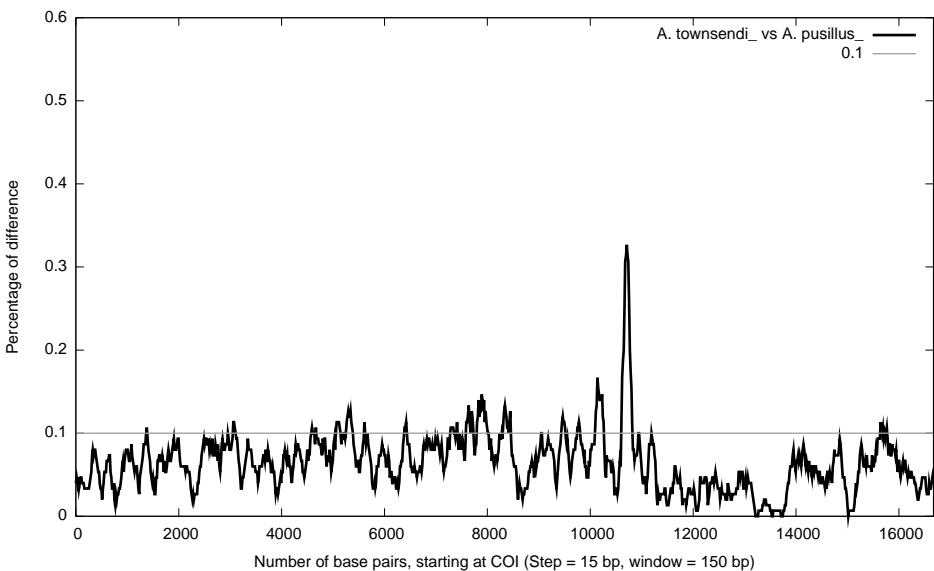

Supplement: S3 (10.1371/journal.pone.0051263.s003) [file journal.pone.0051263.s003]

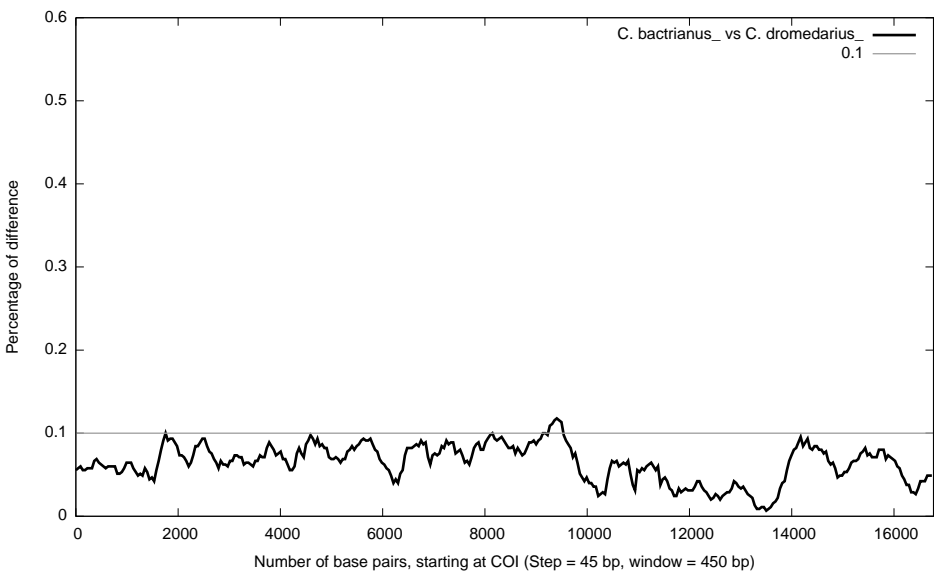

Supplement: S3 (10.1371/journal.pone.0051263.s003) [file journal.pone.0051263.s003]

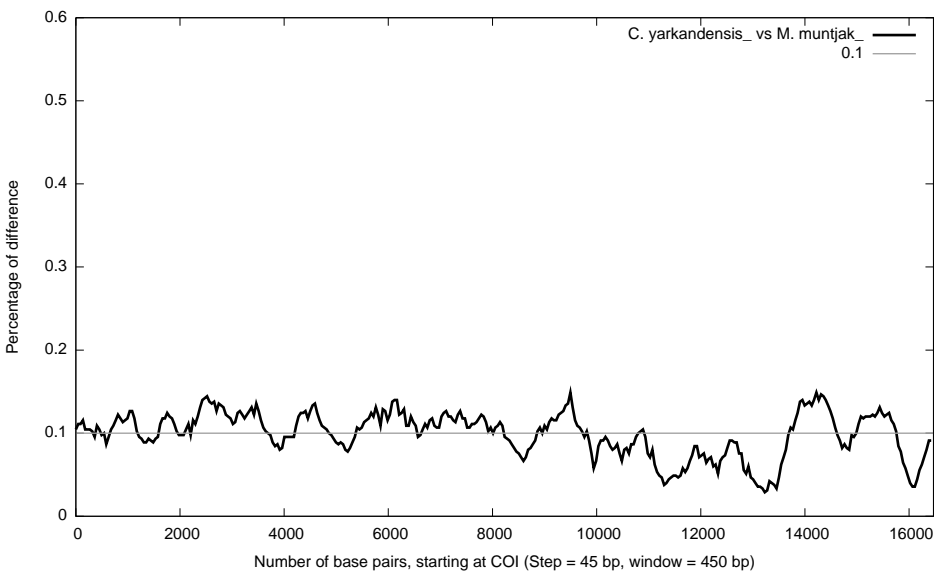

Supplement: S3 (10.1371/journal.pone.0051263.s003) [file journal.pone.0051263.s003]

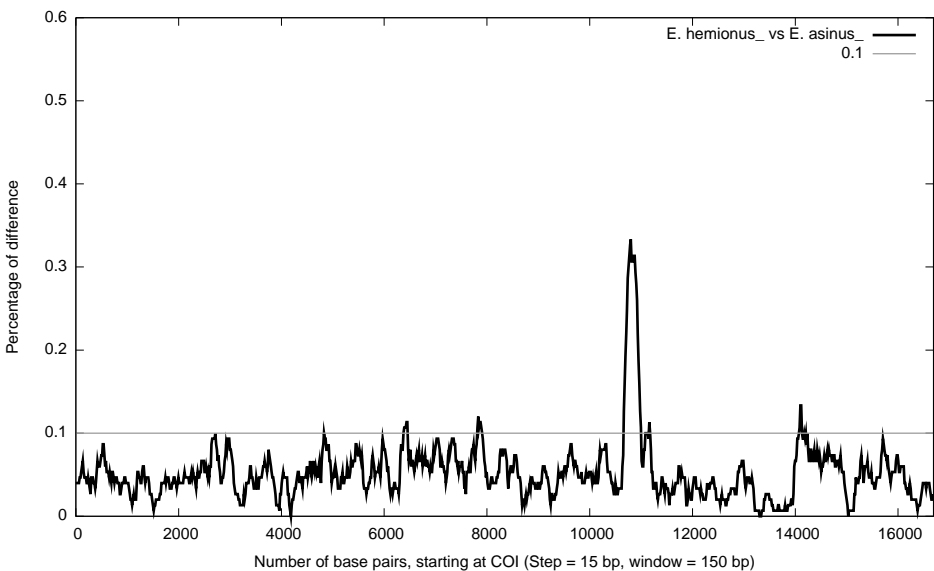

Supplement: S3 (10.1371/journal.pone.0051263.s003) [file journal.pone.0051263.s003]

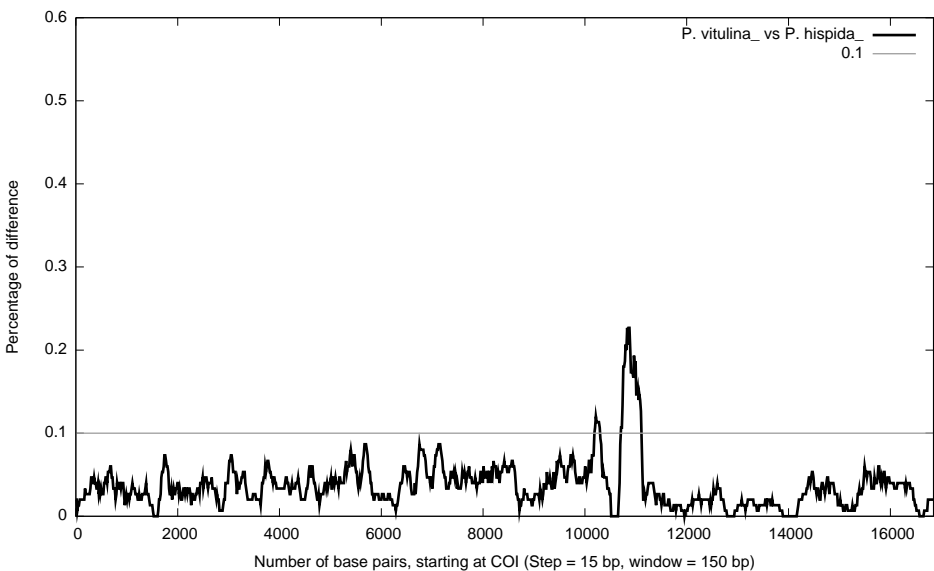

Supplement: S3 (10.1371/journal.pone.0051263.s003) [file journal.pone.0051263.s003]

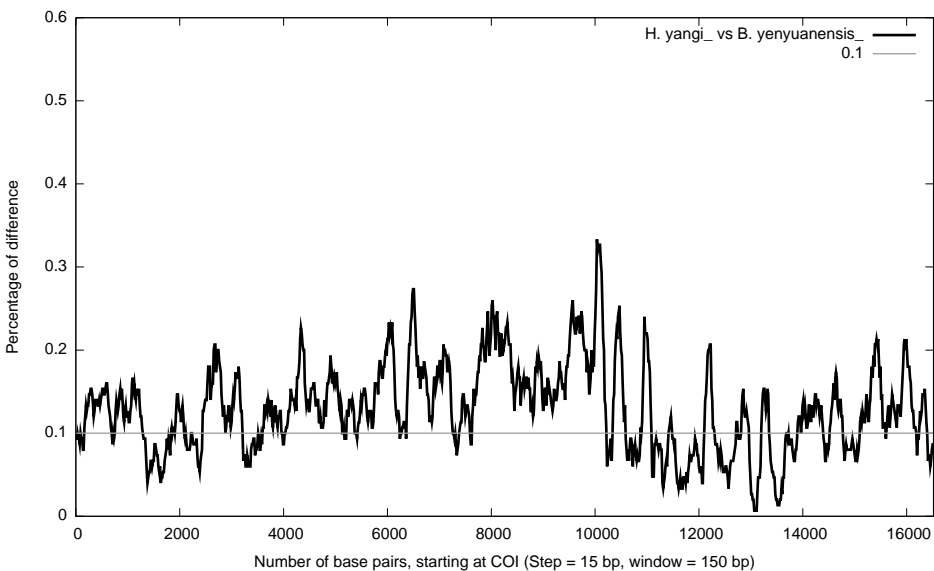

Supplement: S3 (10.1371/journal.pone.0051263.s003) [file journal.pone.0051263.s003]

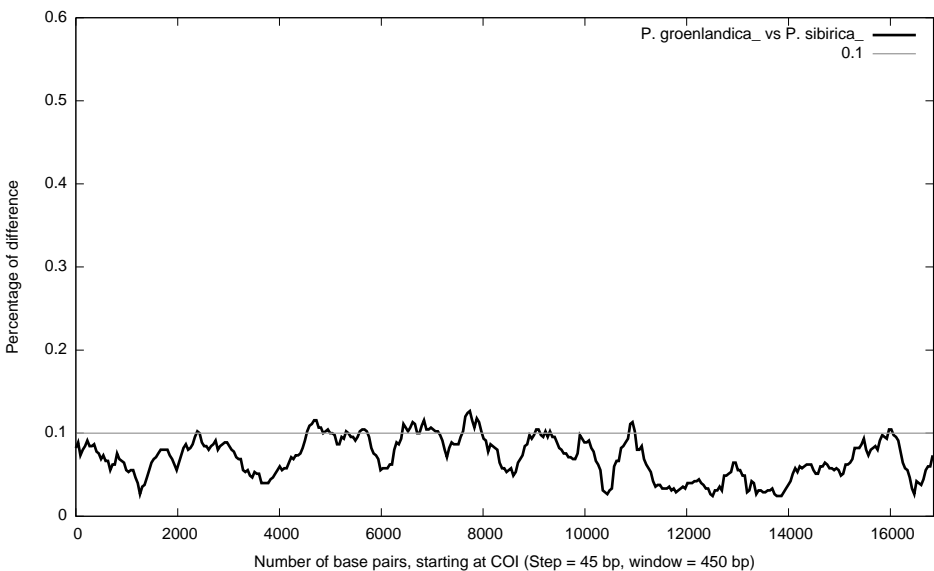

Supplement: S3 (10.1371/journal.pone.0051263.s003) [file journal.pone.0051263.s003]

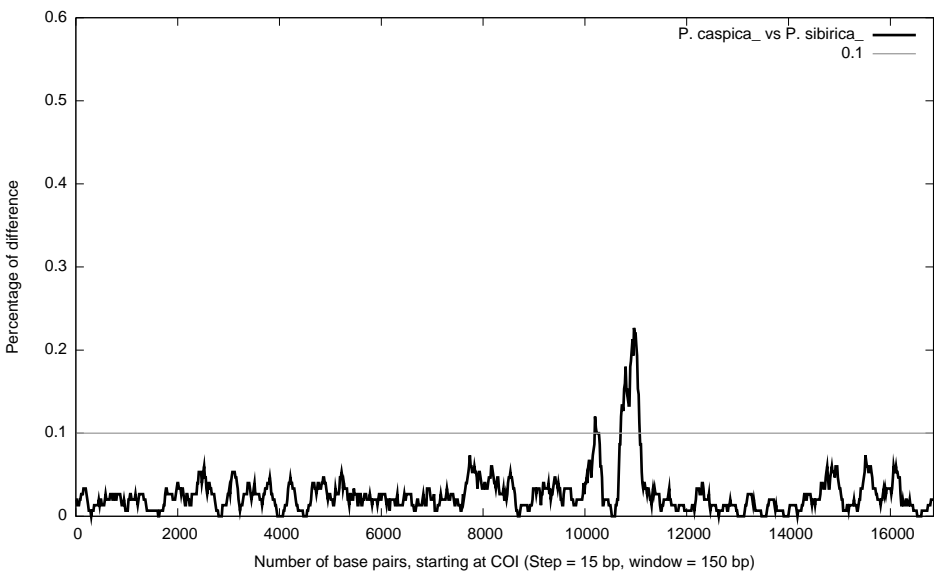

Supplement: S3 (10.1371/journal.pone.0051263.s003) [file journal.pone.0051263.s003]

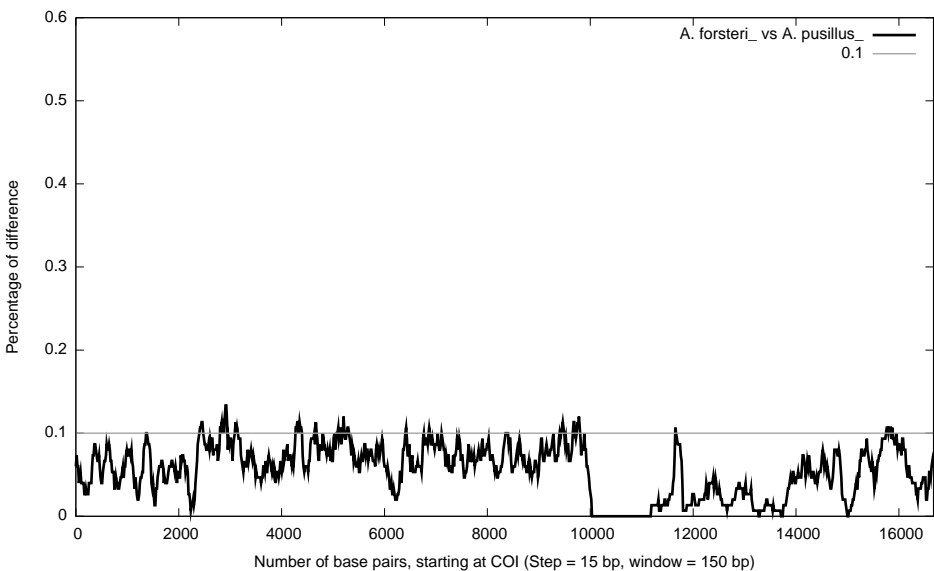

Supplement: S3 (10.1371/journal.pone.0051263.s003) [file journal.pone.0051263.s003]

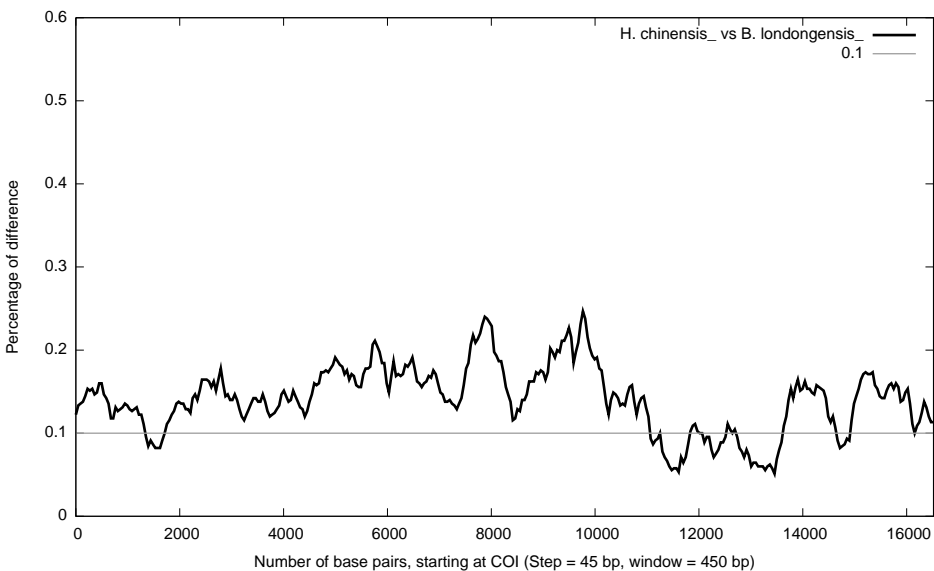

Supplement: S3 (10.1371/journal.pone.0051263.s003) [file journal.pone.0051263.s003]

# Cercopithecidae

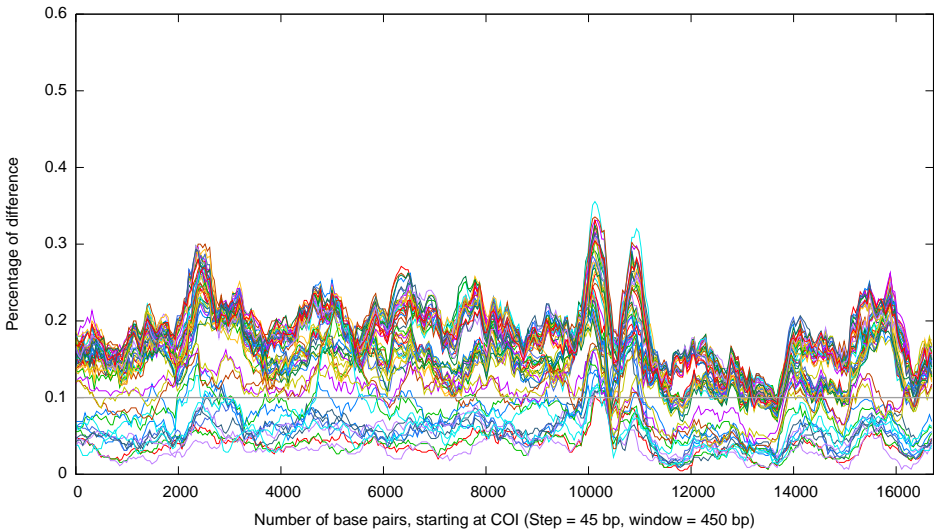

Supplement: S3 (10.1371/journal.pone.0051263.s003) [file journal.pone.0051263.s003]

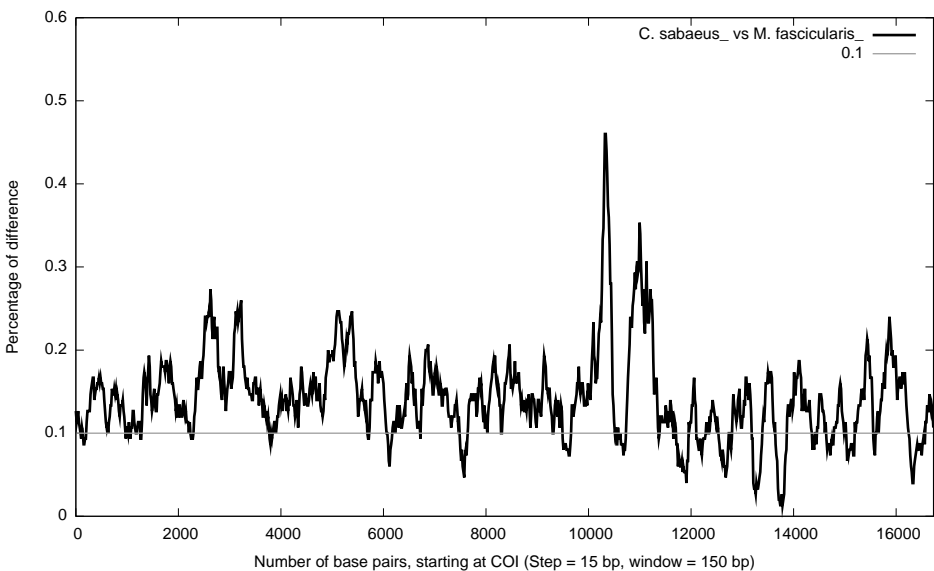

Supplement: S3 (10.1371/journal.pone.0051263.s003) [file journal.pone.0051263.s003]

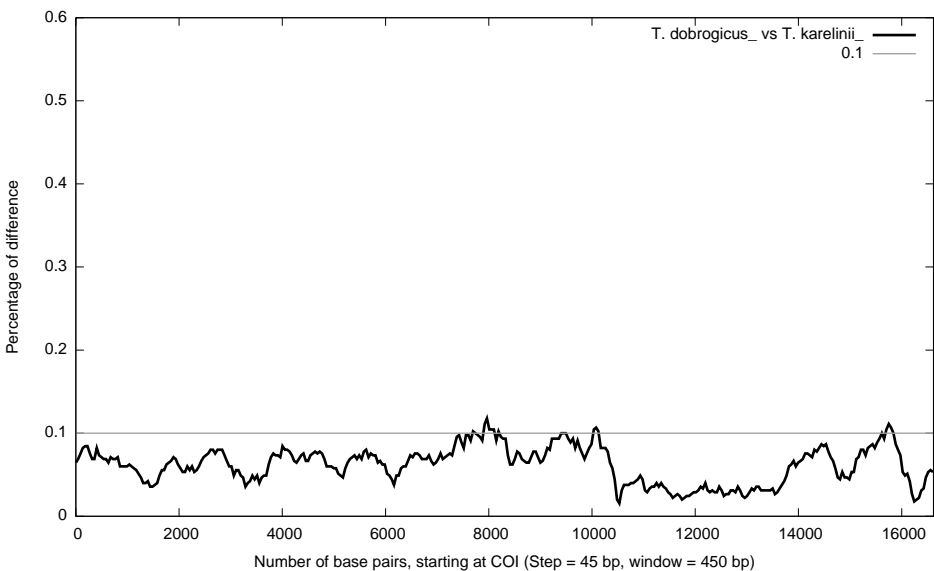

Supplement: S3 (10.1371/journal.pone.0051263.s003) [file journal.pone.0051263.s003]

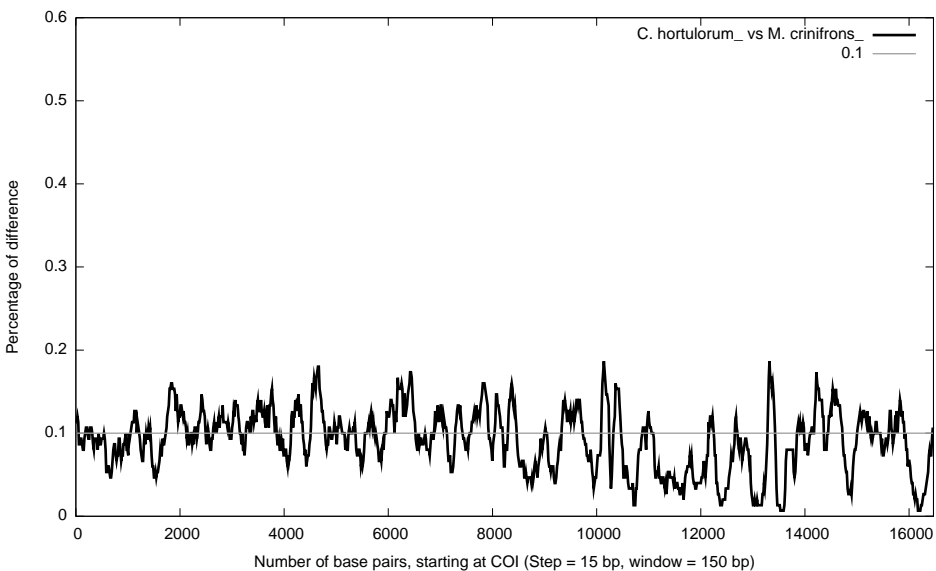

Supplement: S3 (10.1371/journal.pone.0051263.s003) [file journal.pone.0051263.s003]

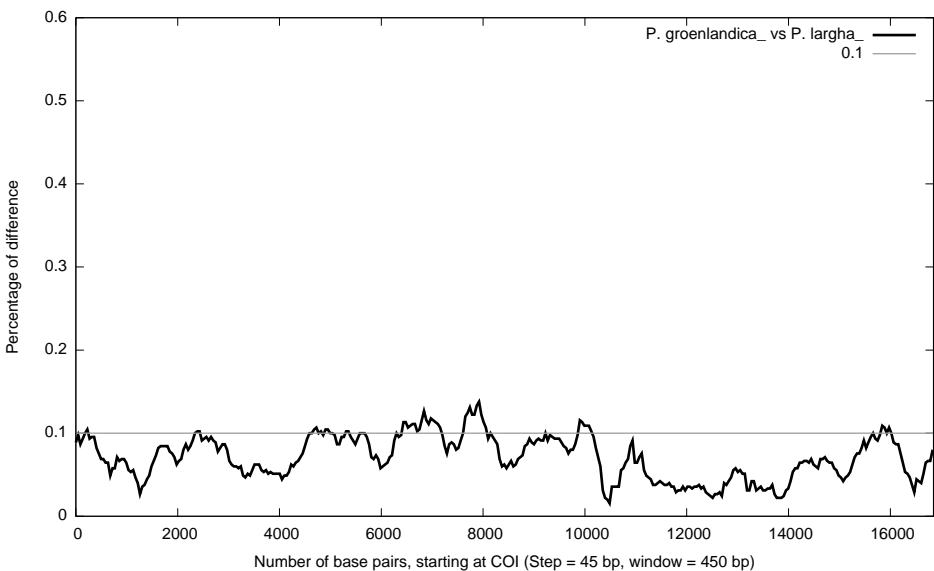

Supplement: S3 (10.1371/journal.pone.0051263.s003) [file journal.pone.0051263.s003]

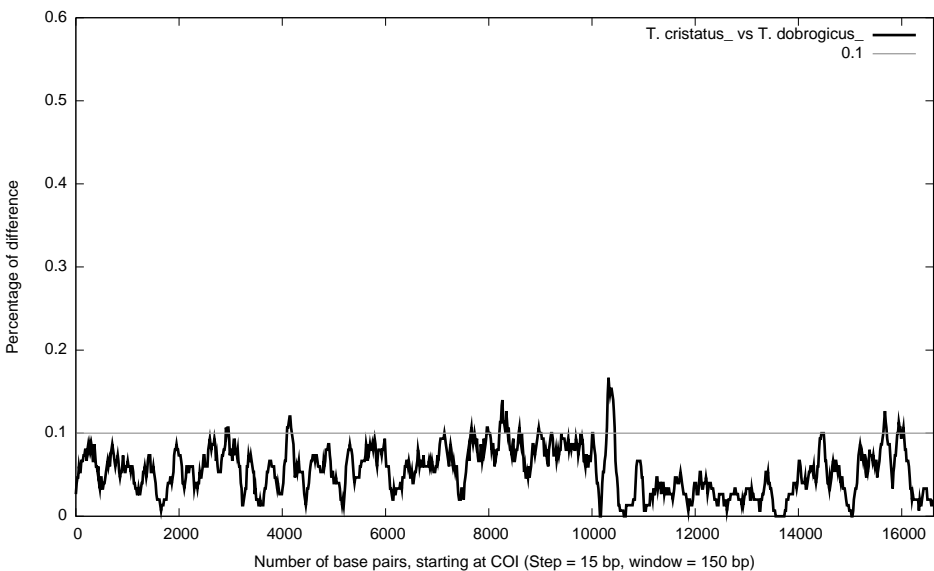

Supplement: S3 (10.1371/journal.pone.0051263.s003) [file journal.pone.0051263.s003]

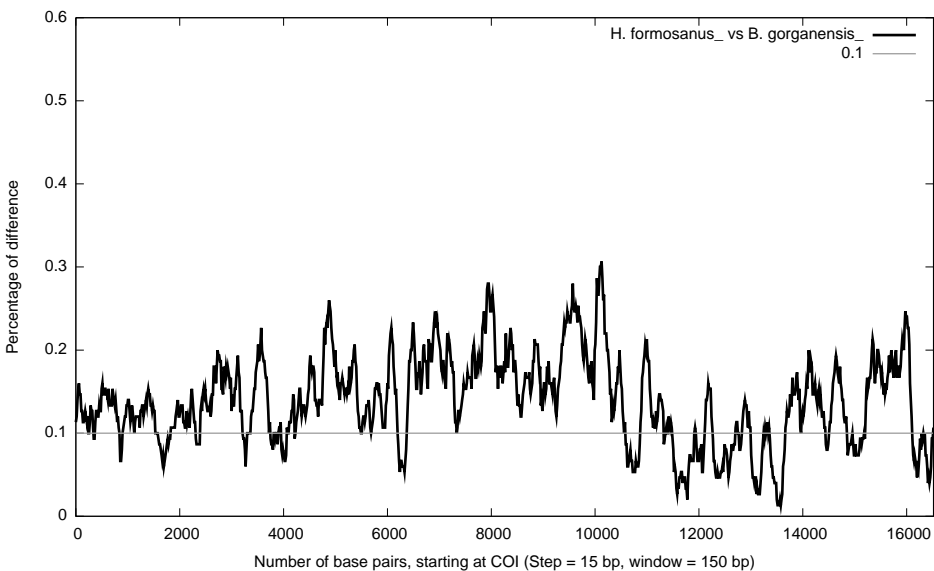

Supplement: S3 (10.1371/journal.pone.0051263.s003) [file journal.pone.0051263.s003]

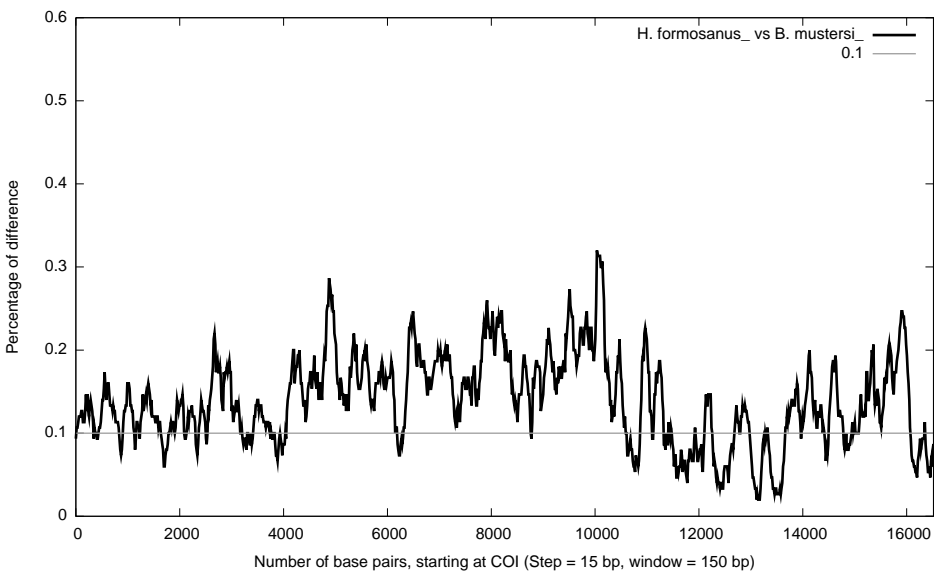

Supplement: S3 (10.1371/journal.pone.0051263.s003) [file journal.pone.0051263.s003]

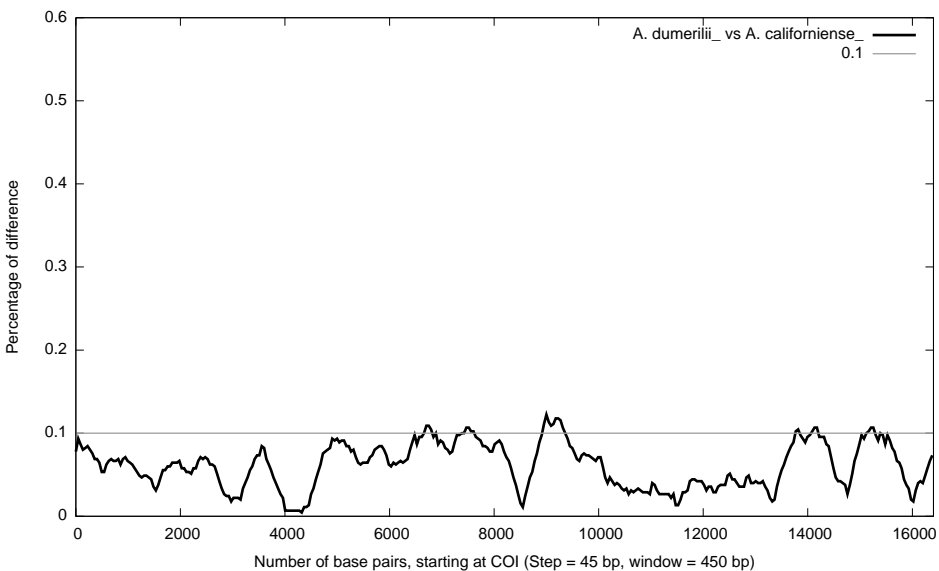

Supplement: S3 (10.1371/journal.pone.0051263.s003) [file journal.pone.0051263.s003]

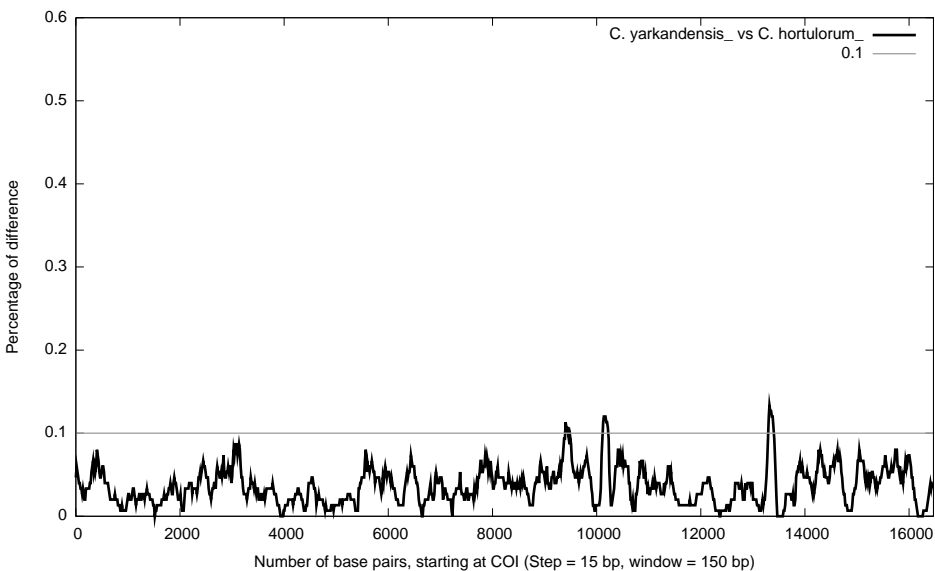

Supplement: S3 (10.1371/journal.pone.0051263.s003) [file journal.pone.0051263.s003]

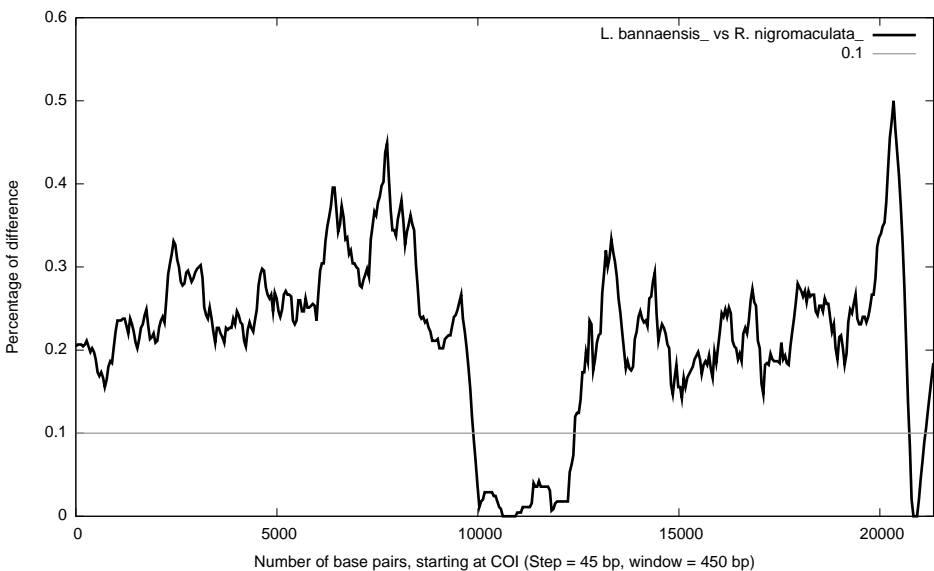

Supplement: S3 (10.1371/journal.pone.0051263.s003) [file journal.pone.0051263.s003]

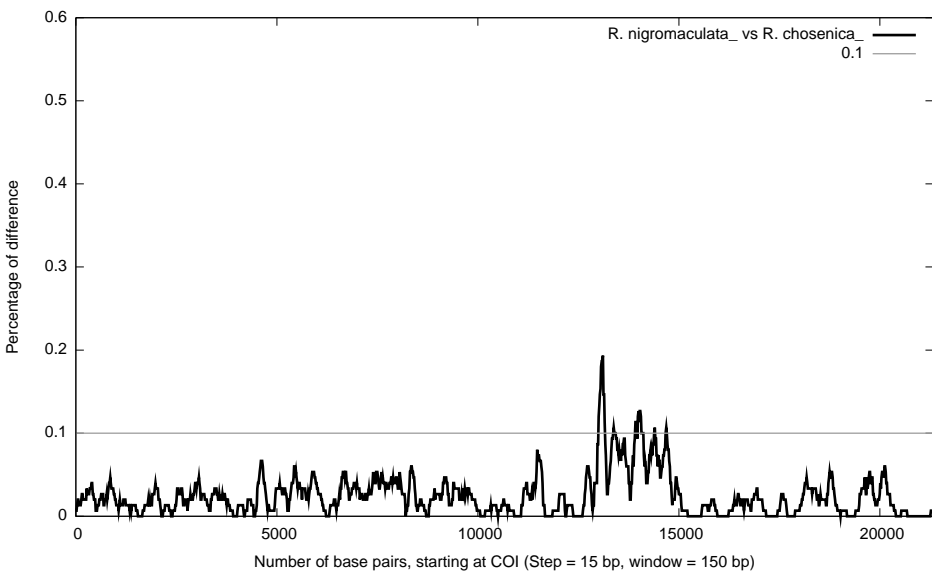

Supplement: S3 (10.1371/journal.pone.0051263.s003) [file journal.pone.0051263.s003]

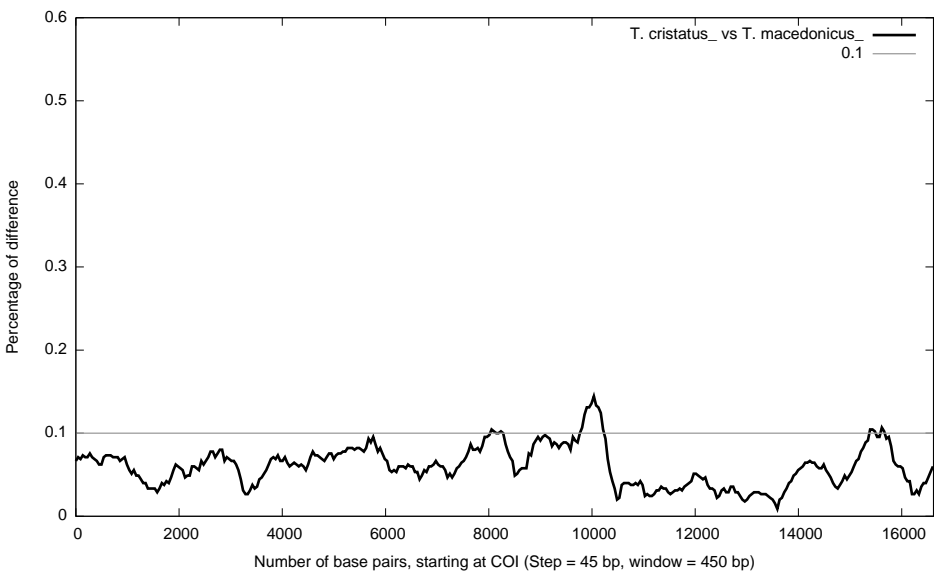

Supplement: S3 (10.1371/journal.pone.0051263.s003) [file journal.pone.0051263.s003]

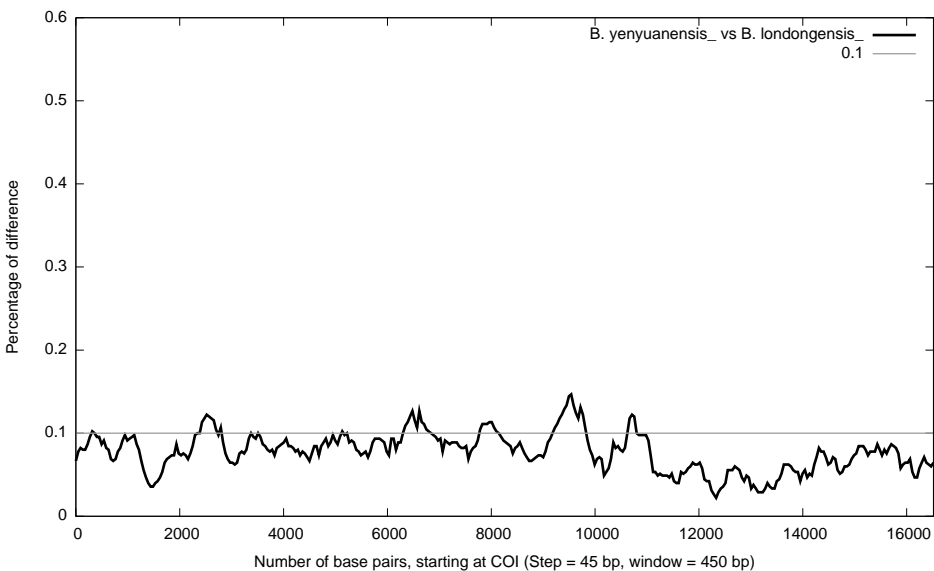

Supplement: S3 (10.1371/journal.pone.0051263.s003) [file journal.pone.0051263.s003]

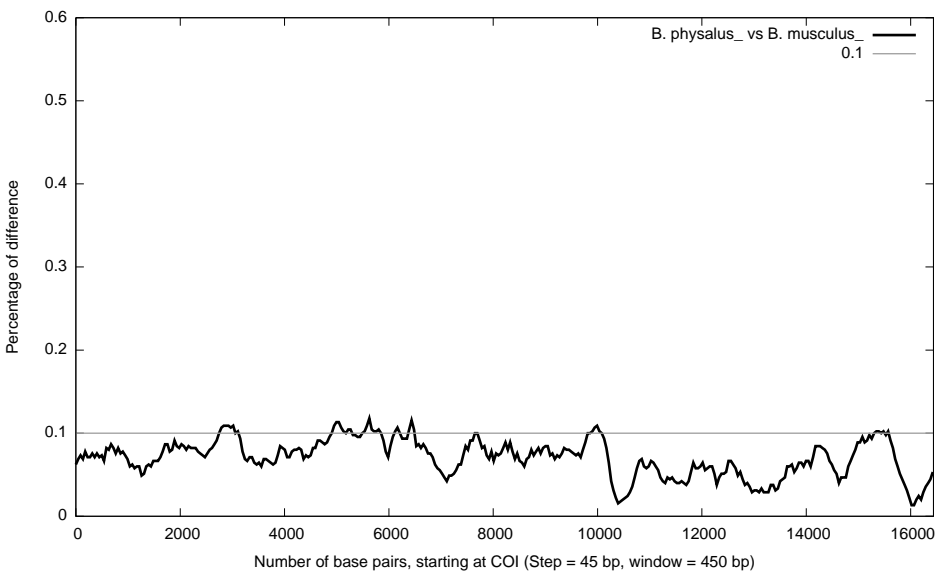

Supplement: S3 (10.1371/journal.pone.0051263.s003) [file journal.pone.0051263.s003]

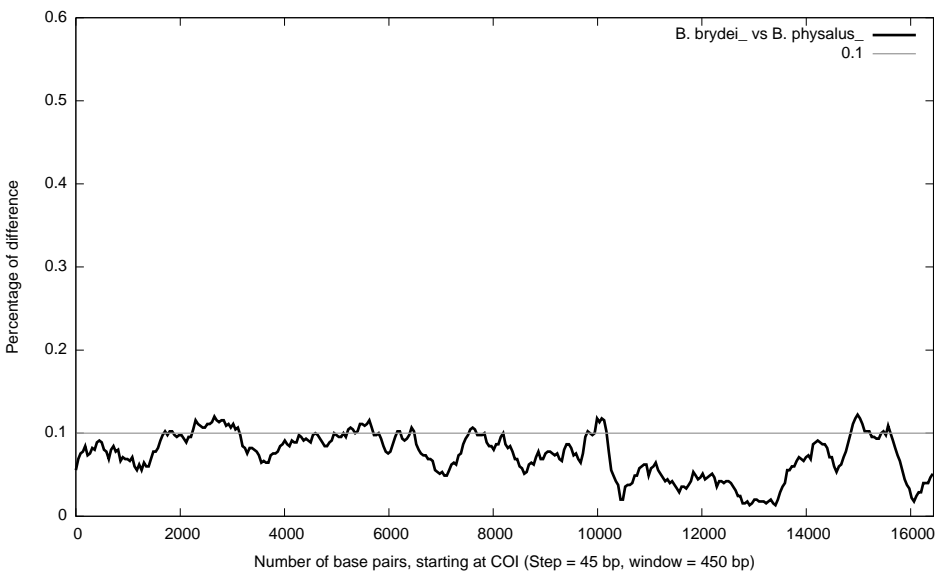

Supplement: S3 (10.1371/journal.pone.0051263.s003) [file journal.pone.0051263.s003]

# Bufo nidae

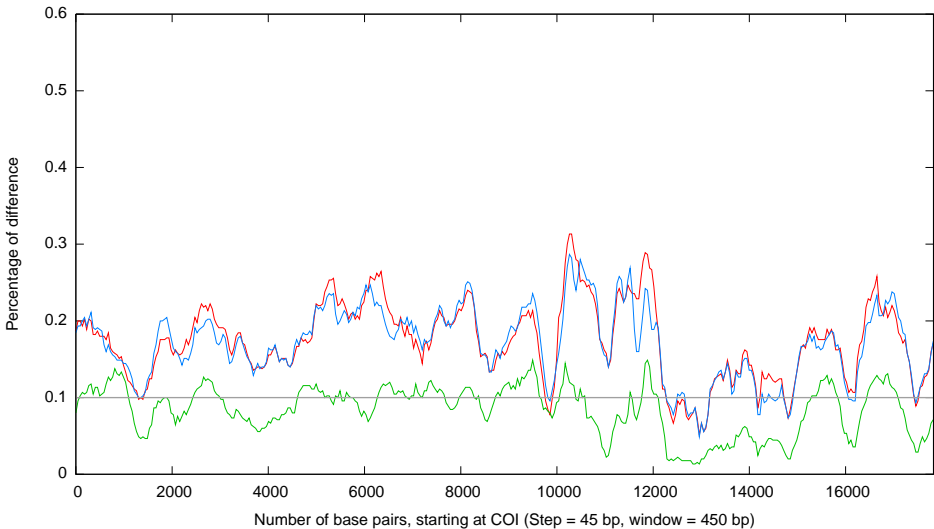

Supplement: S3 (10.1371/journal.pone.0051263.s003) [file journal.pone.0051263.s003]

# Pteropodidae

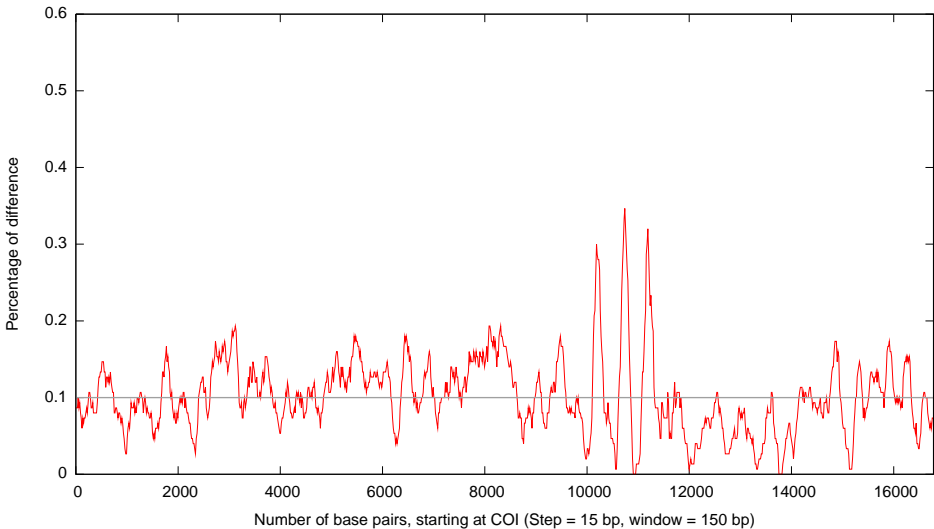

Supplement: S3 (10.1371/journal.pone.0051263.s003) [file journal.pone.0051263.s003]

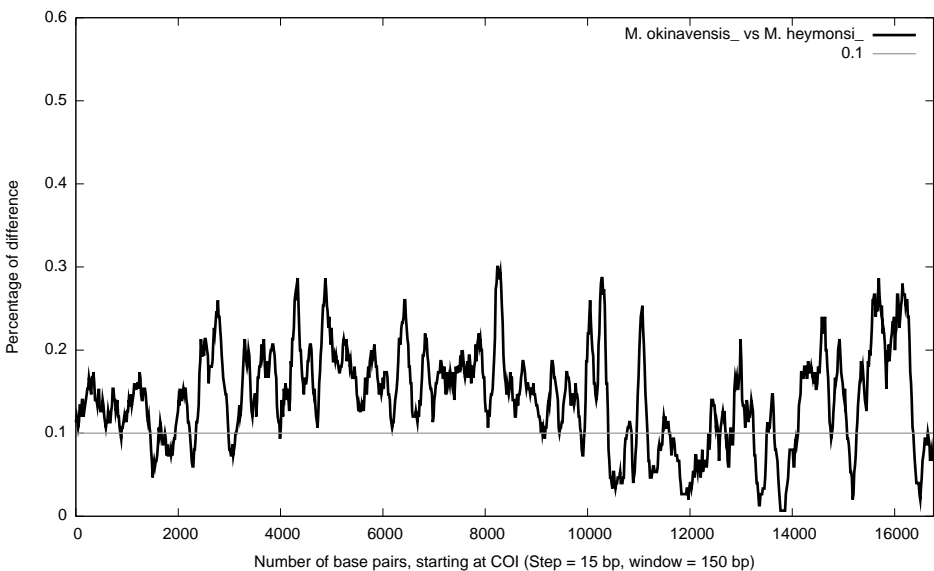

Supplement: S3 (10.1371/journal.pone.0051263.s003) [file journal.pone.0051263.s003]

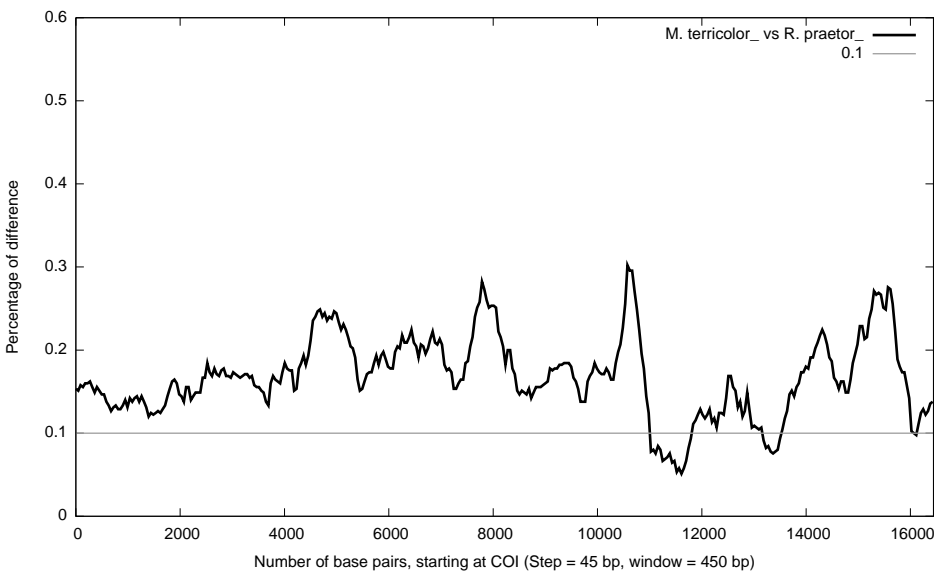

Supplement: S3 (10.1371/journal.pone.0051263.s003) [file journal.pone.0051263.s003]

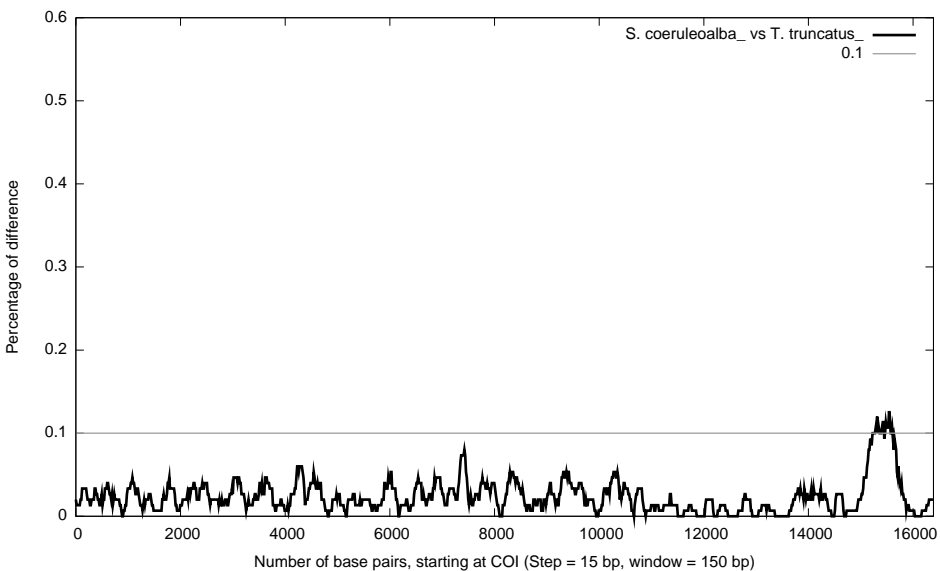

Supplement: S3 (10.1371/journal.pone.0051263.s003) [file journal.pone.0051263.s003]

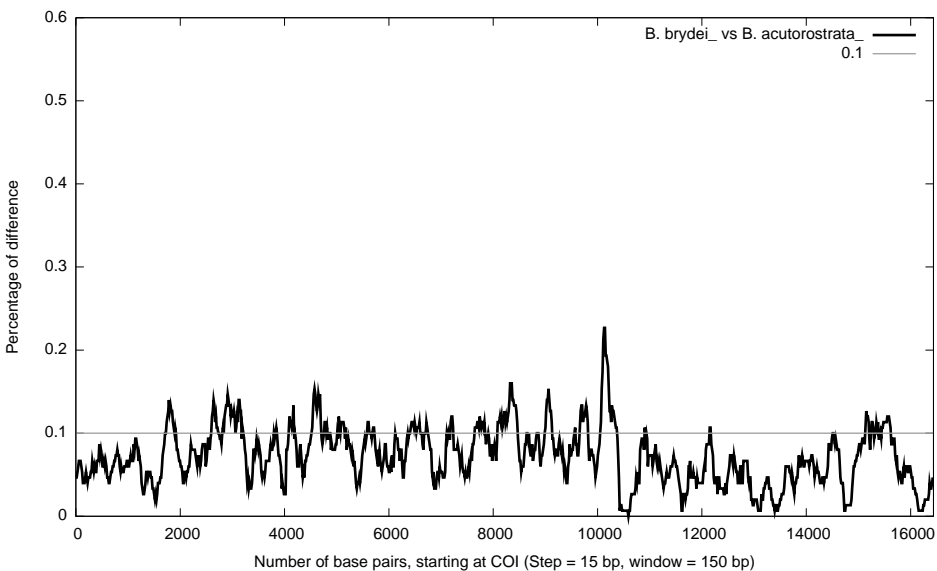

Supplement: S3 (10.1371/journal.pone.0051263.s003) [file journal.pone.0051263.s003]

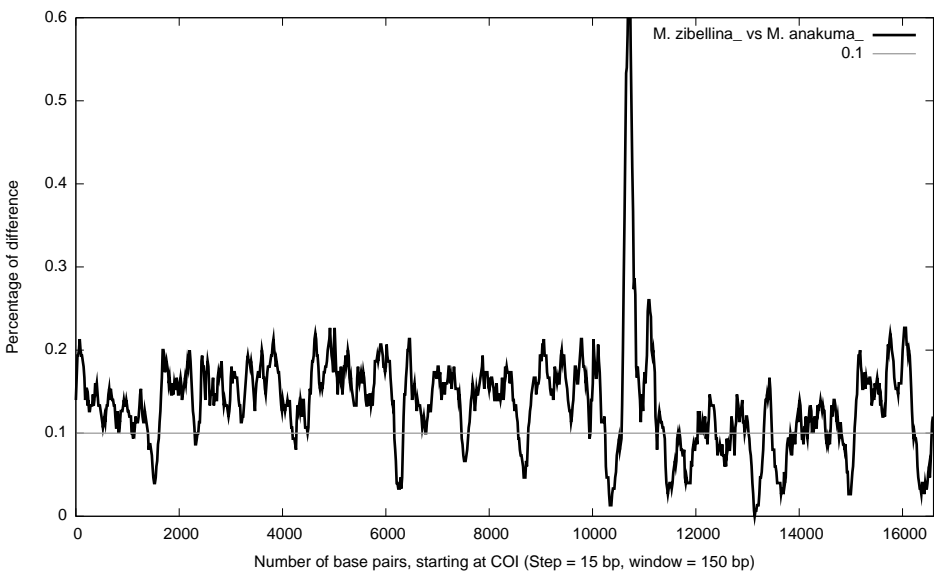

Supplement: S3 (10.1371/journal.pone.0051263.s003) [file journal.pone.0051263.s003]
