# Supplementary figures and images for: Conveniently Pre-Tagged and Pre-Packaged: Extended Molecular Identification and Metagenomics Using Complete Metazoan Mitochondrial Genomes (part 5 of 10)
Source: PLOS journal article supplement (doi:10.1371/journal.pone.0051263), 2012-12-14

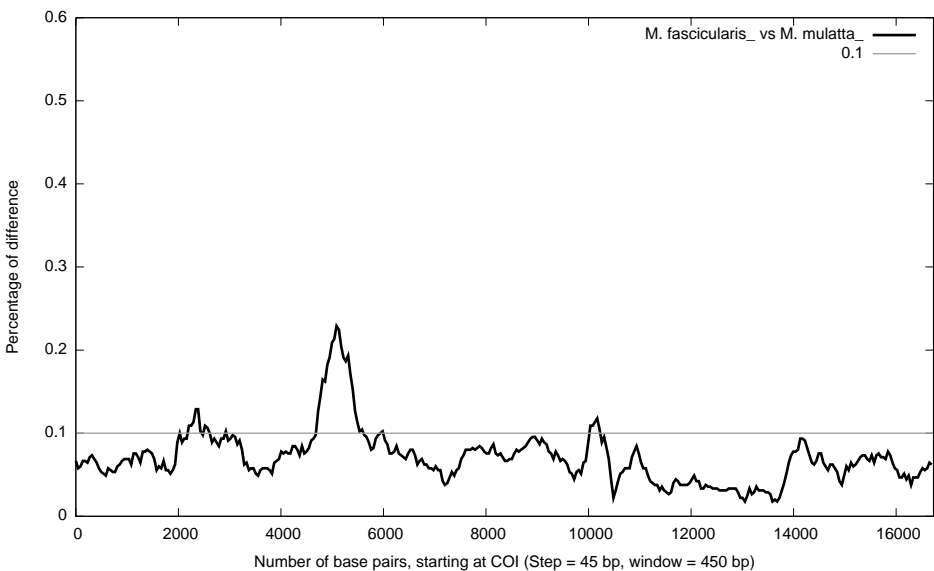

Supplement: S3 (10.1371/journal.pone.0051263.s003) [file journal.pone.0051263.s003]

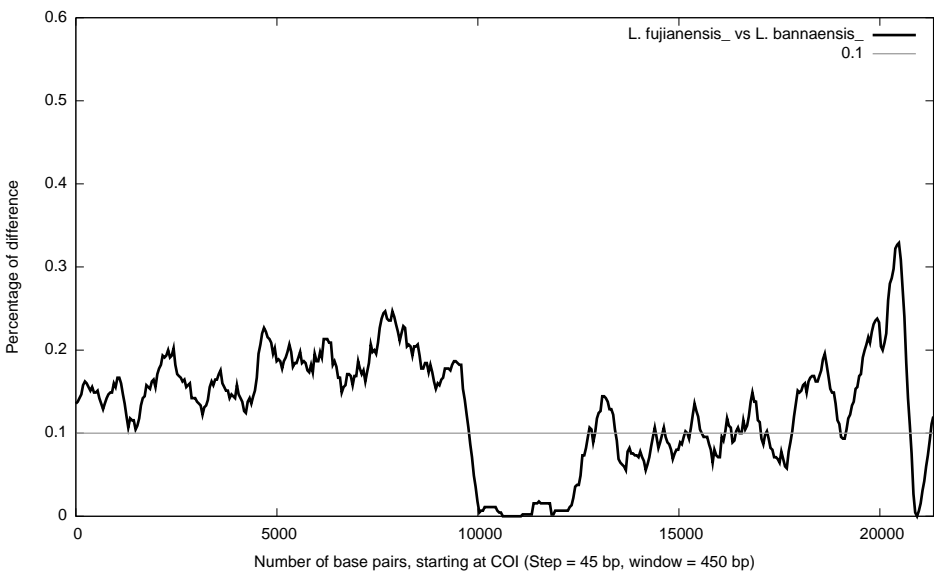

Supplement: S3 (10.1371/journal.pone.0051263.s003) [file journal.pone.0051263.s003]

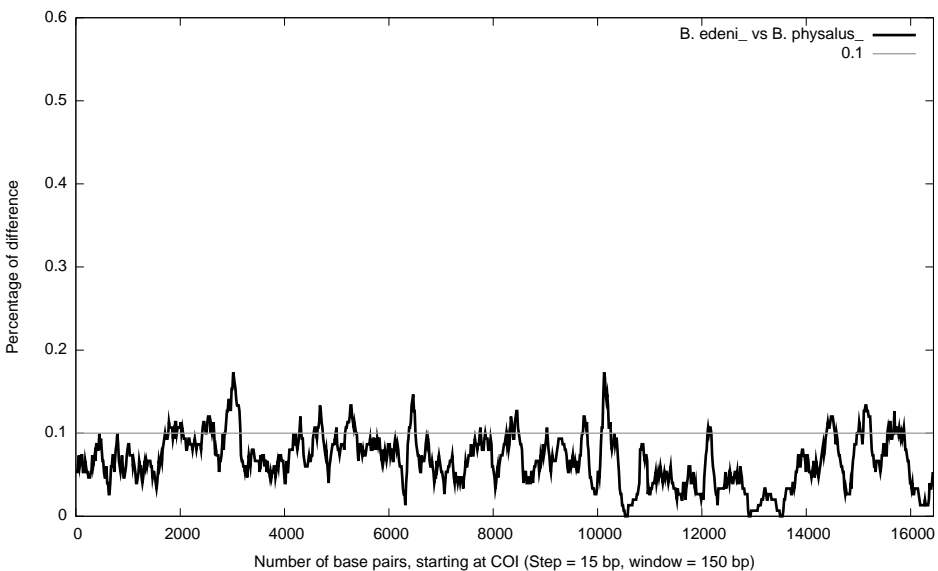

Supplement: S3 (10.1371/journal.pone.0051263.s003) [file journal.pone.0051263.s003]

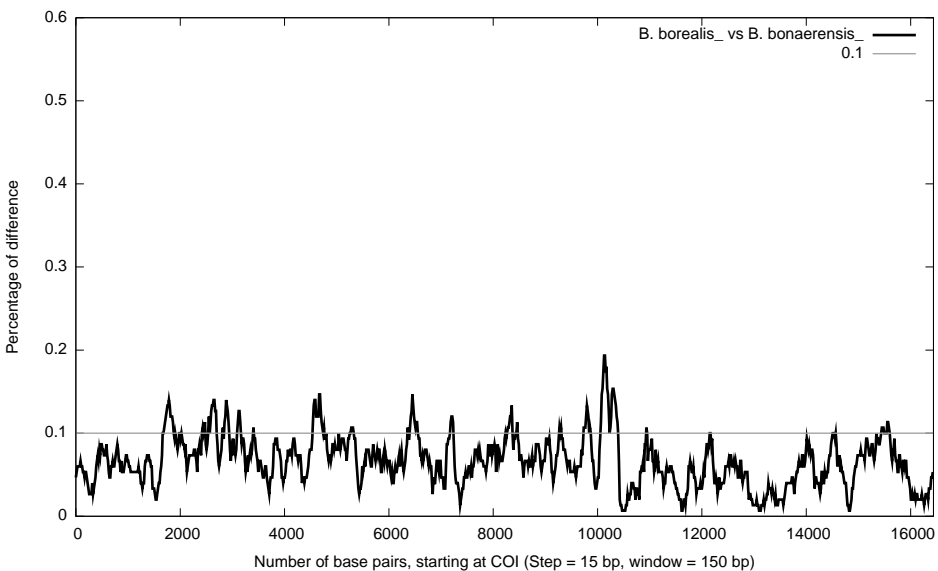

Supplement: S3 (10.1371/journal.pone.0051263.s003) [file journal.pone.0051263.s003]

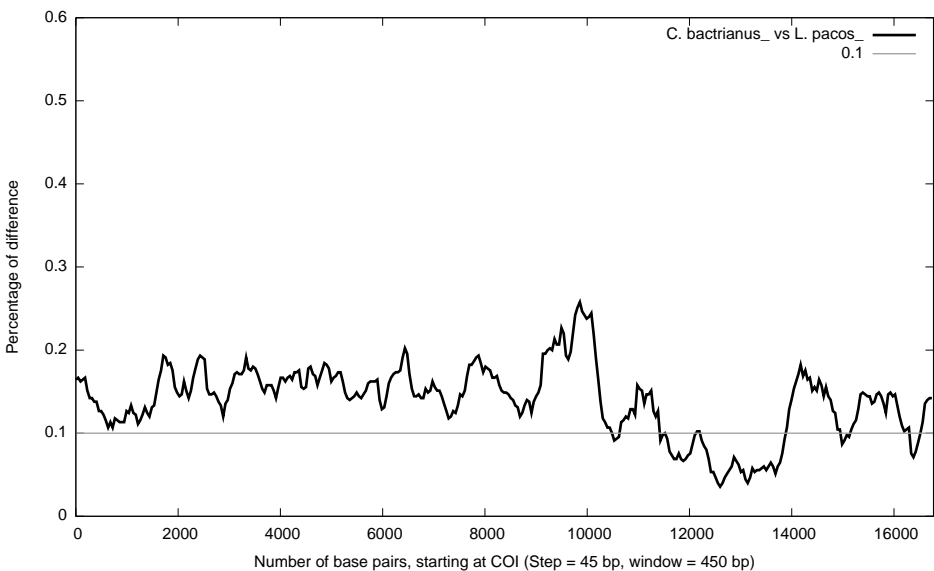

Supplement: S3 (10.1371/journal.pone.0051263.s003) [file journal.pone.0051263.s003]

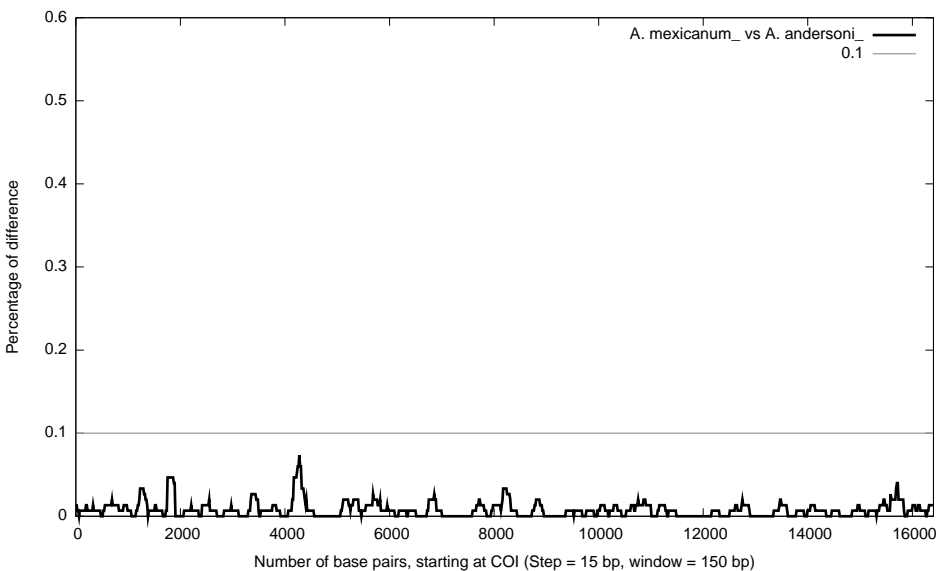

Supplement: S3 (10.1371/journal.pone.0051263.s003) [file journal.pone.0051263.s003]

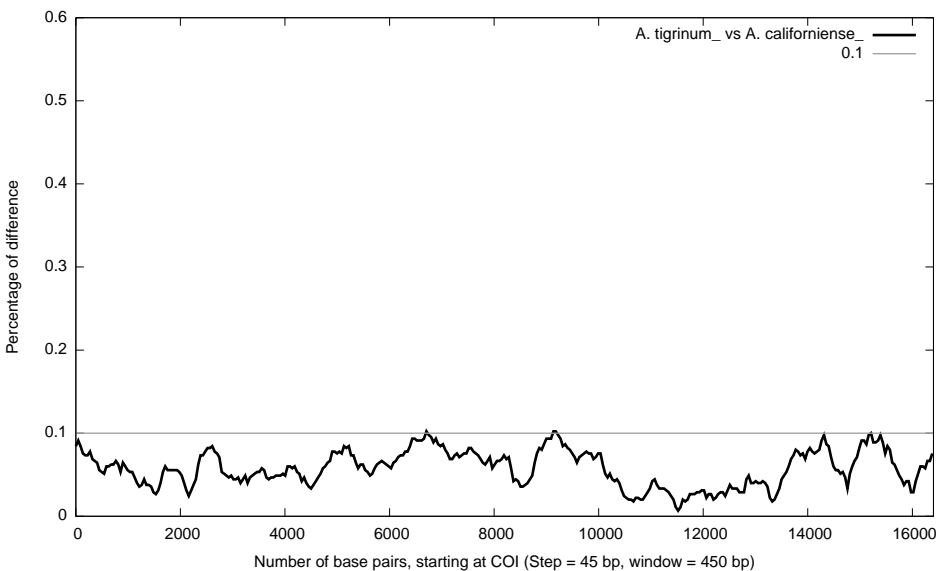

Supplement: S3 (10.1371/journal.pone.0051263.s003) [file journal.pone.0051263.s003]

# Felidae

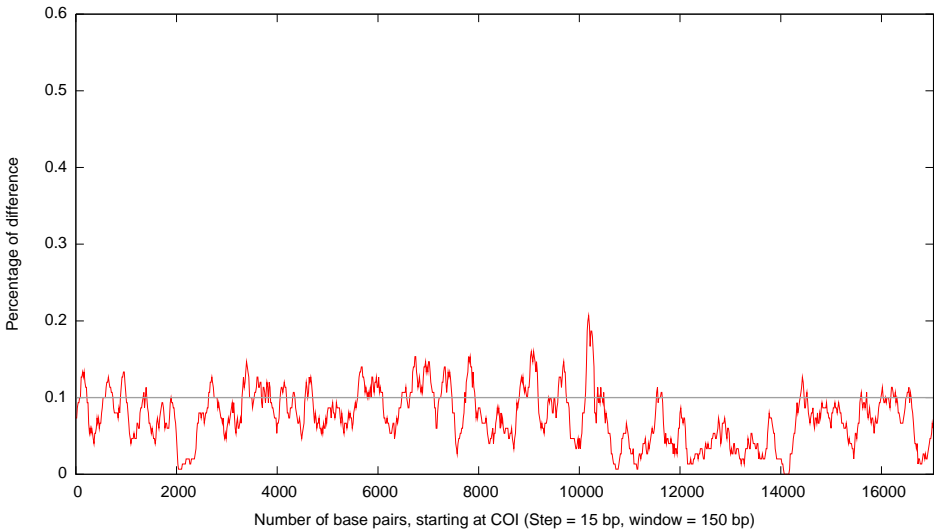

Supplement: S3 (10.1371/journal.pone.0051263.s003) [file journal.pone.0051263.s003]

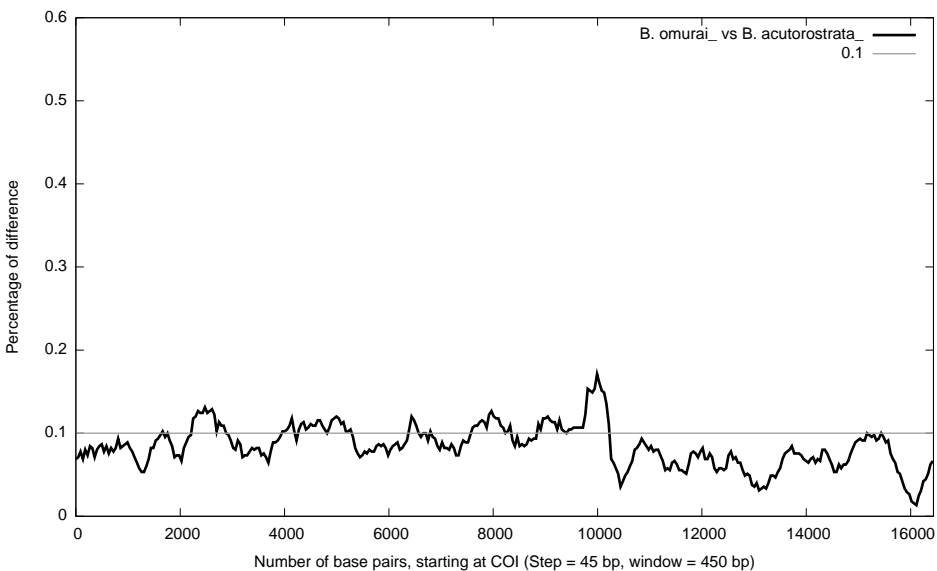

Supplement: S3 (10.1371/journal.pone.0051263.s003) [file journal.pone.0051263.s003]

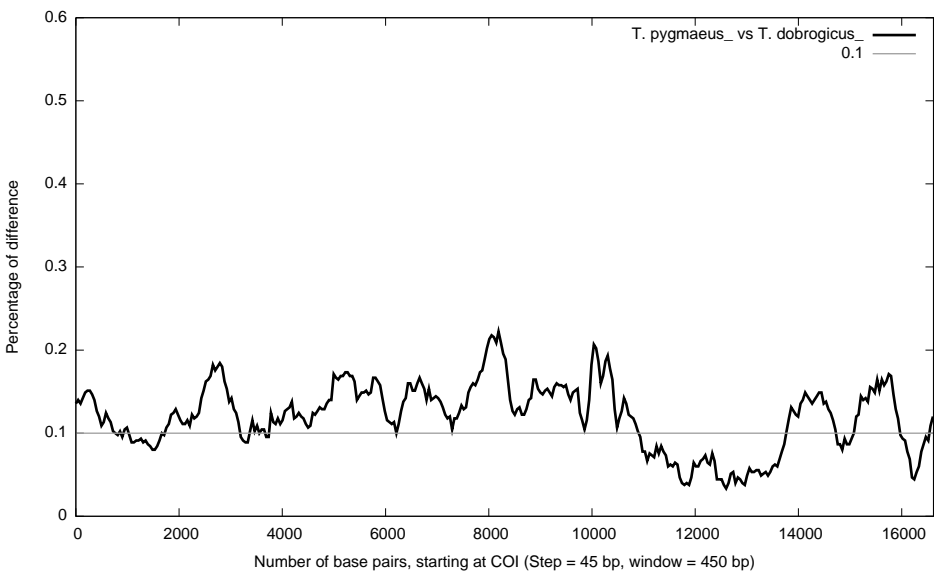

Supplement: S3 (10.1371/journal.pone.0051263.s003) [file journal.pone.0051263.s003]

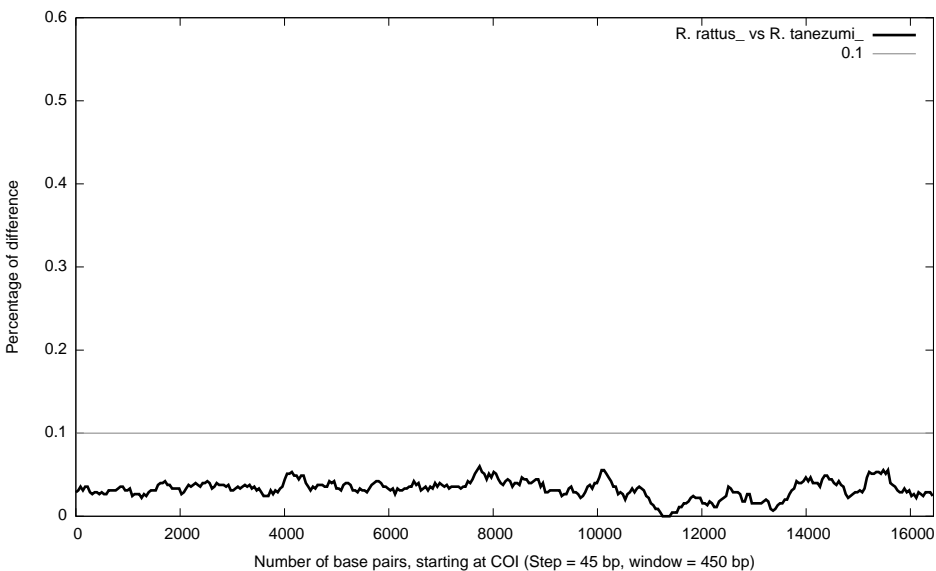

Supplement: S3 (10.1371/journal.pone.0051263.s003) [file journal.pone.0051263.s003]

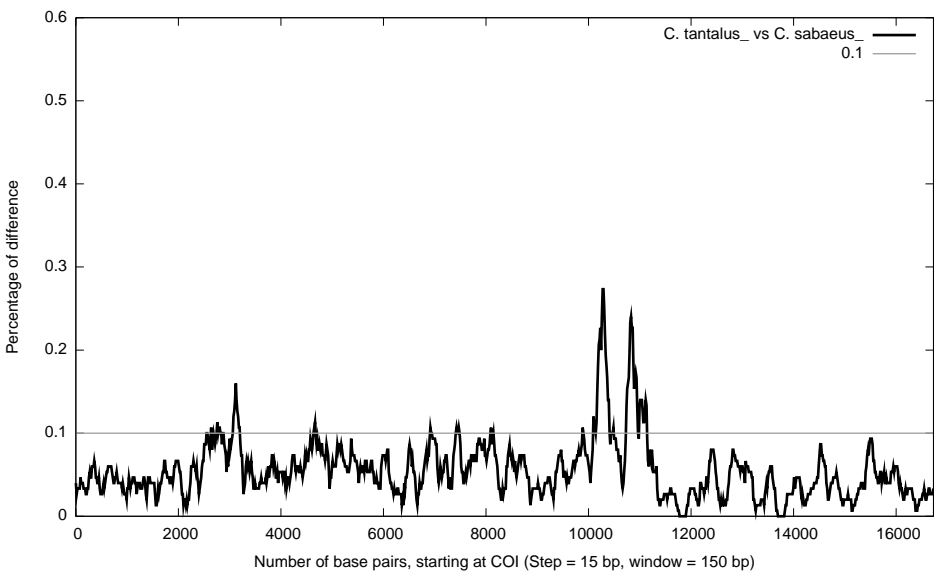

Supplement: S3 (10.1371/journal.pone.0051263.s003) [file journal.pone.0051263.s003]

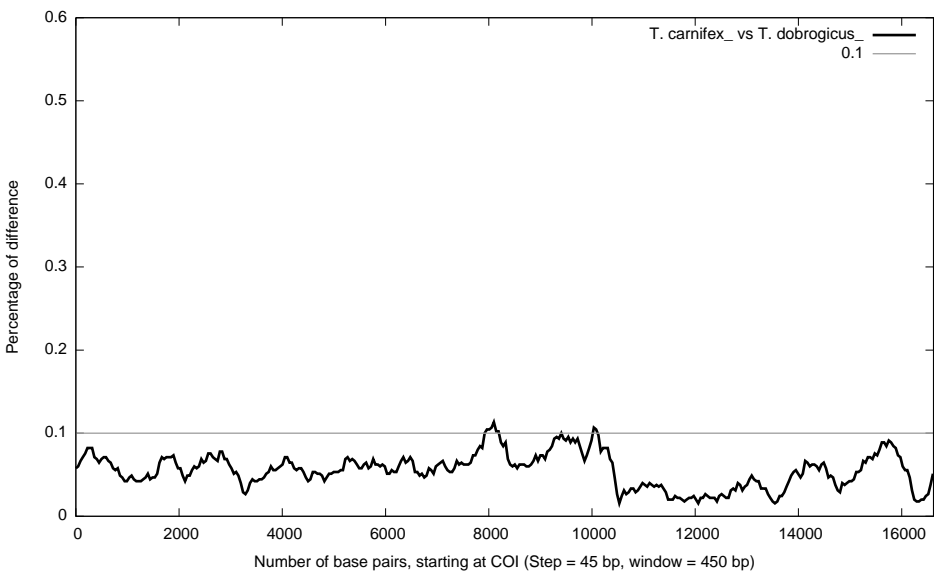

Supplement: S3 (10.1371/journal.pone.0051263.s003) [file journal.pone.0051263.s003]

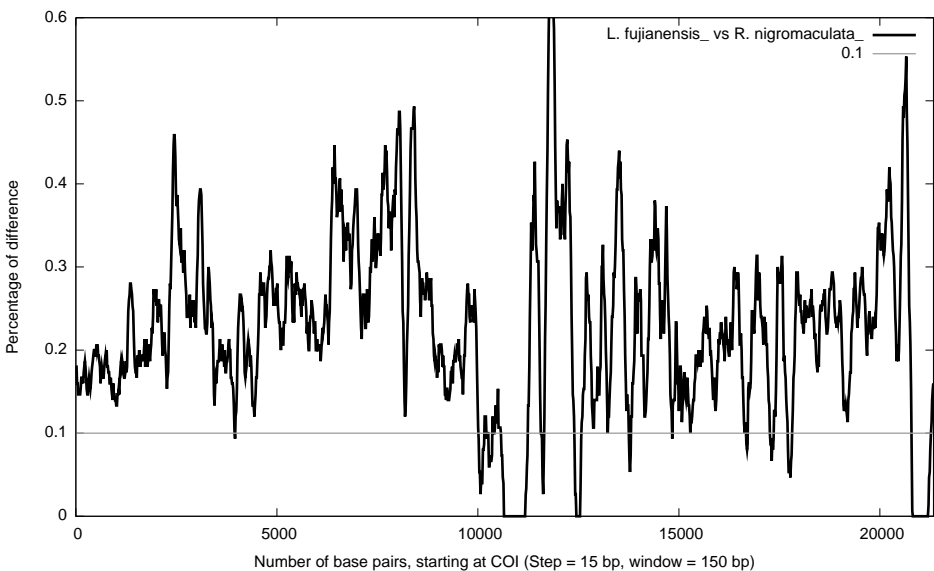

Supplement: S3 (10.1371/journal.pone.0051263.s003) [file journal.pone.0051263.s003]

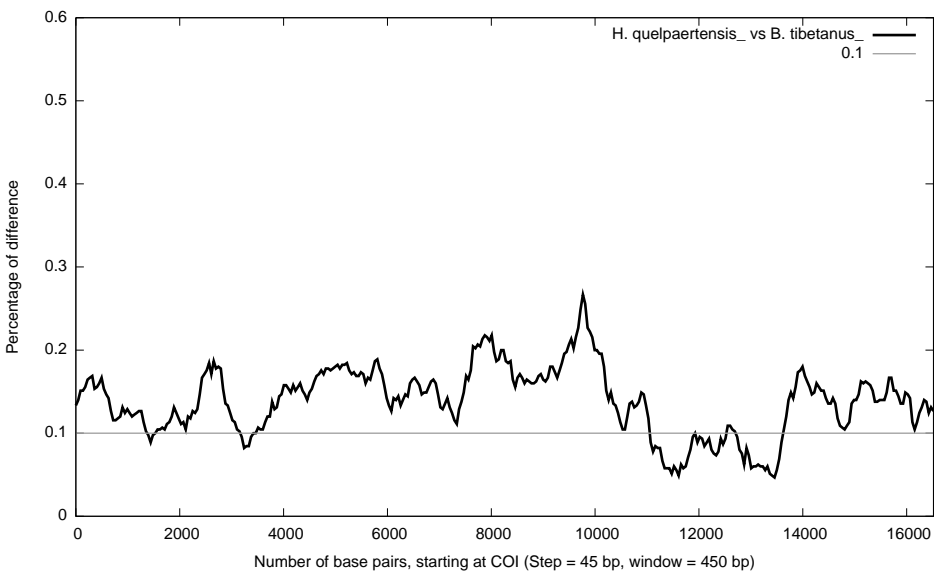

Supplement: S3 (10.1371/journal.pone.0051263.s003) [file journal.pone.0051263.s003]

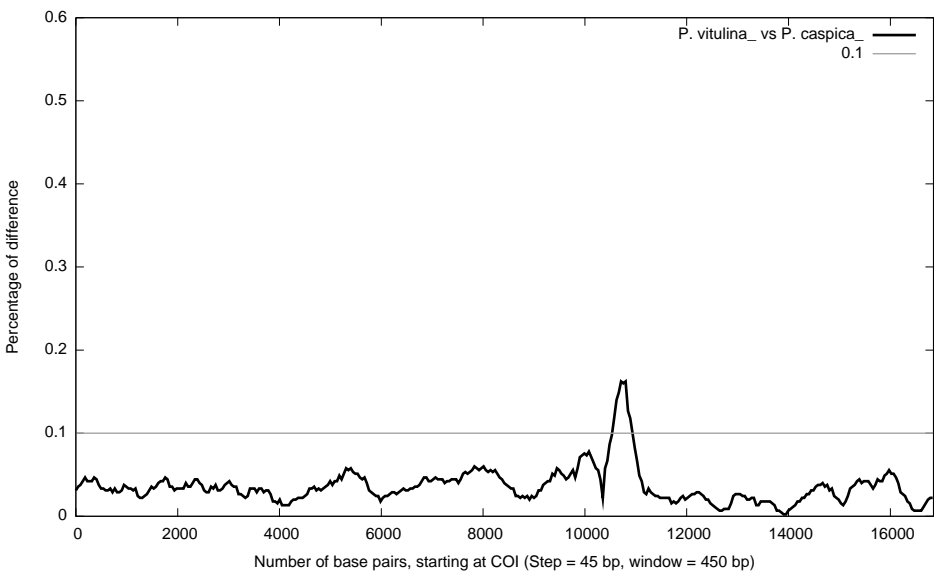

Supplement: S3 (10.1371/journal.pone.0051263.s003) [file journal.pone.0051263.s003]

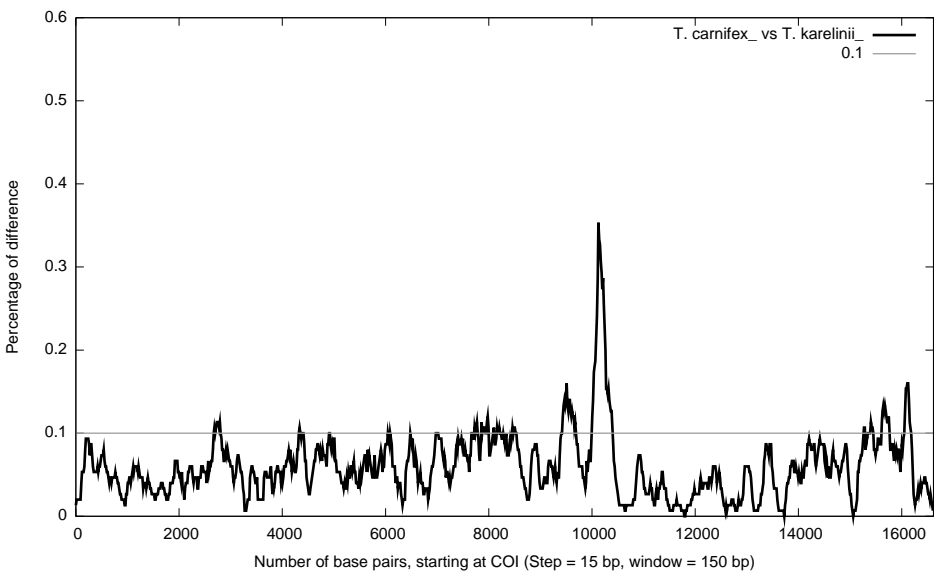

Supplement: S3 (10.1371/journal.pone.0051263.s003) [file journal.pone.0051263.s003]

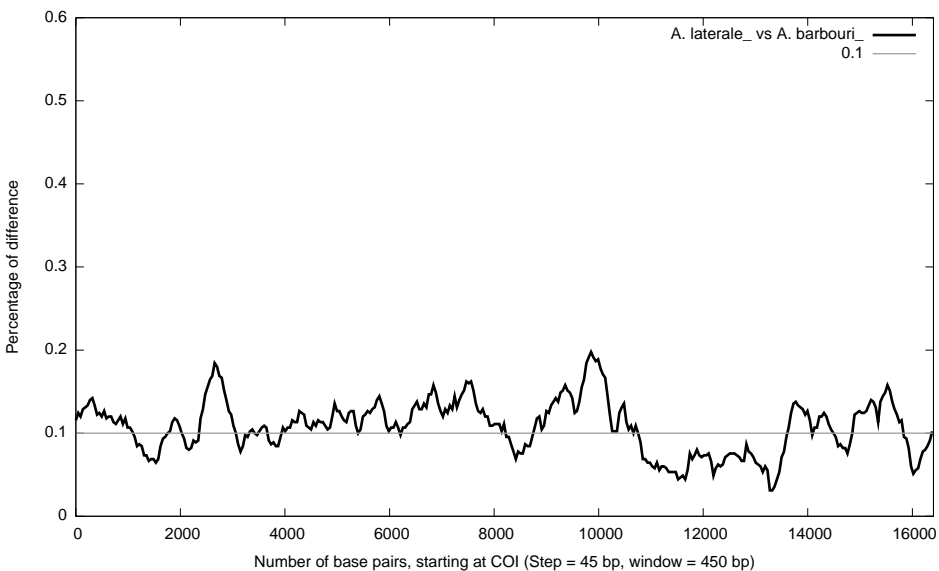

Supplement: S3 (10.1371/journal.pone.0051263.s003) [file journal.pone.0051263.s003]

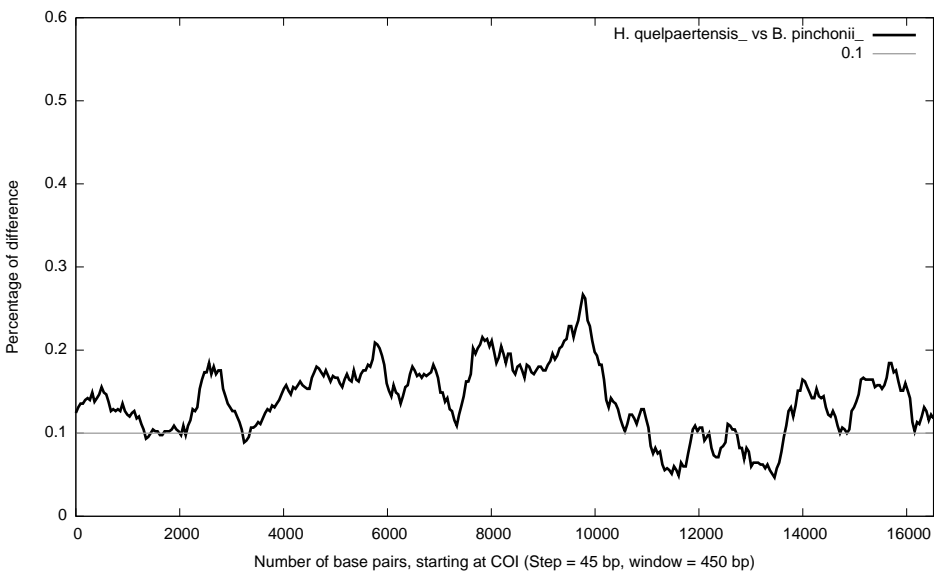

Supplement: S3 (10.1371/journal.pone.0051263.s003) [file journal.pone.0051263.s003]

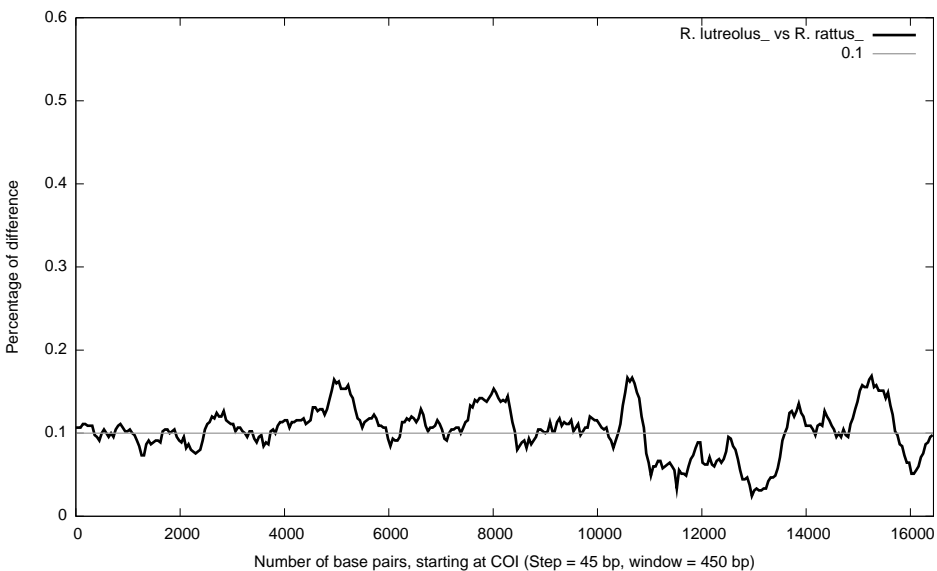

Supplement: S3 (10.1371/journal.pone.0051263.s003) [file journal.pone.0051263.s003]

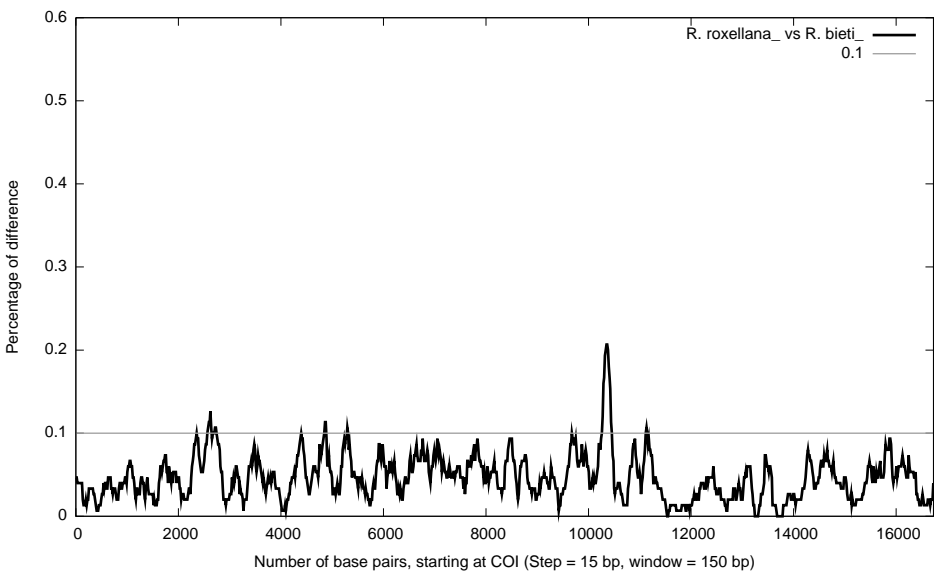

Supplement: S3 (10.1371/journal.pone.0051263.s003) [file journal.pone.0051263.s003]

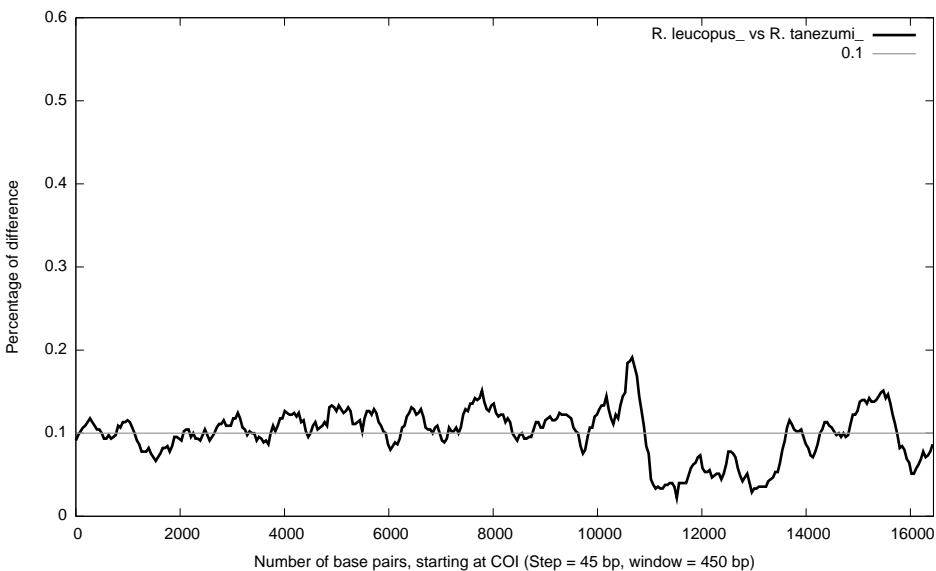

Supplement: S3 (10.1371/journal.pone.0051263.s003) [file journal.pone.0051263.s003]

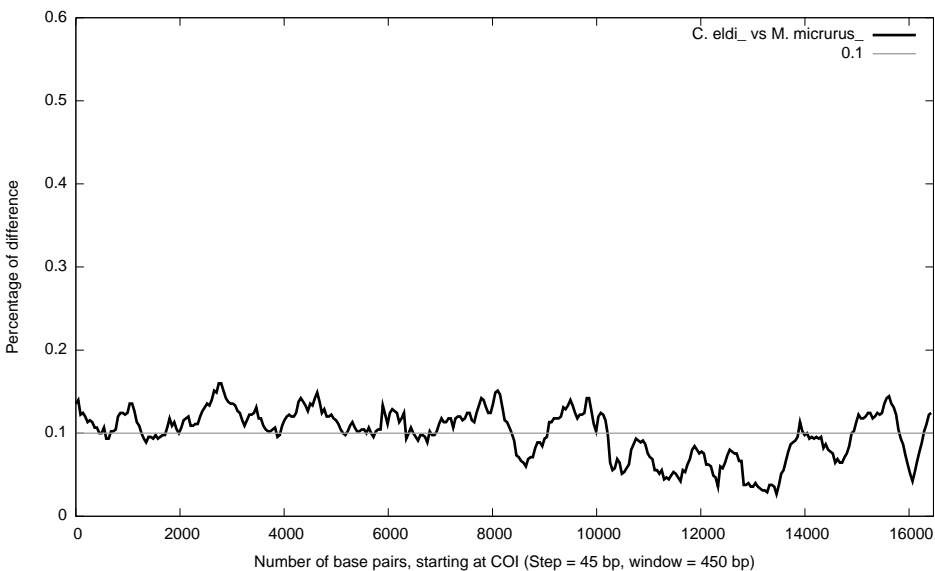

Supplement: S3 (10.1371/journal.pone.0051263.s003) [file journal.pone.0051263.s003]

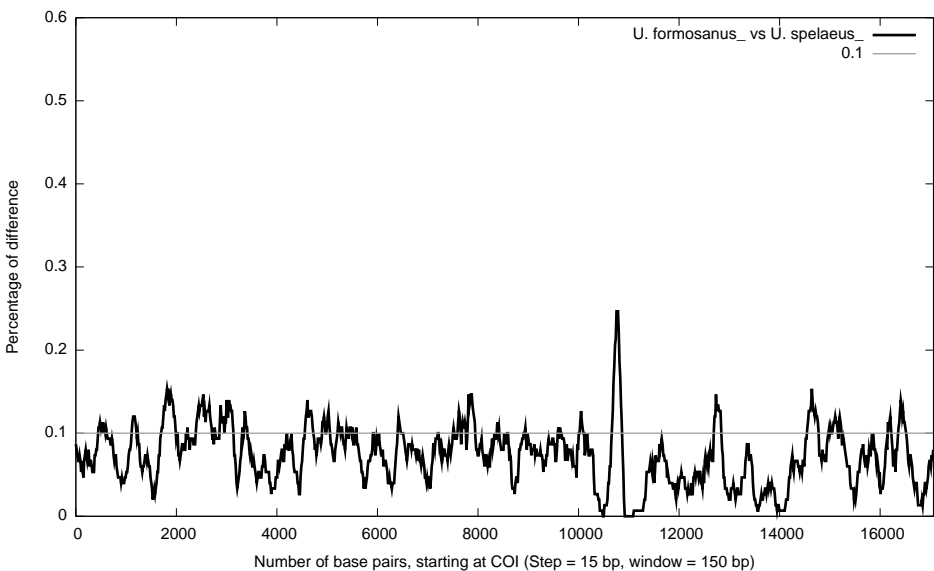

Supplement: S3 (10.1371/journal.pone.0051263.s003) [file journal.pone.0051263.s003]

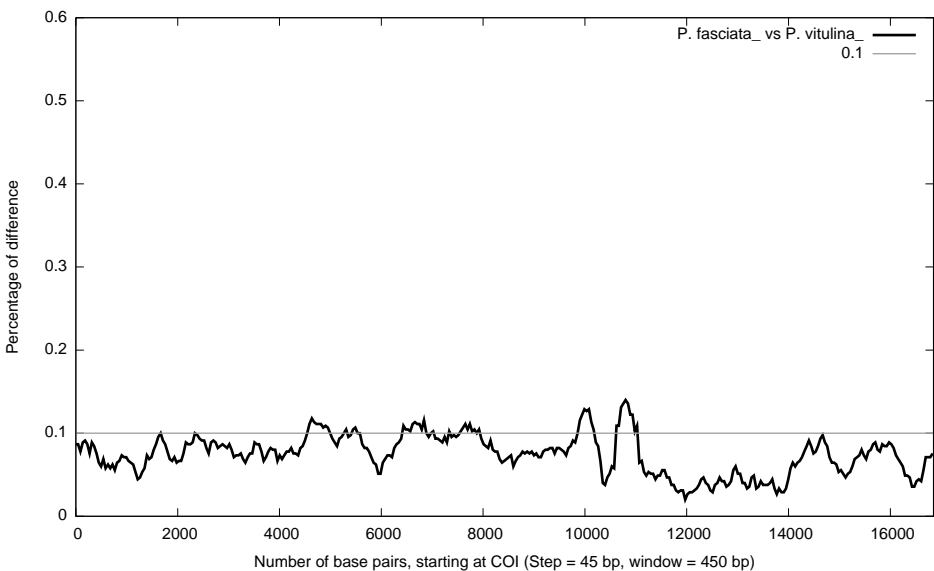

Supplement: S3 (10.1371/journal.pone.0051263.s003) [file journal.pone.0051263.s003]

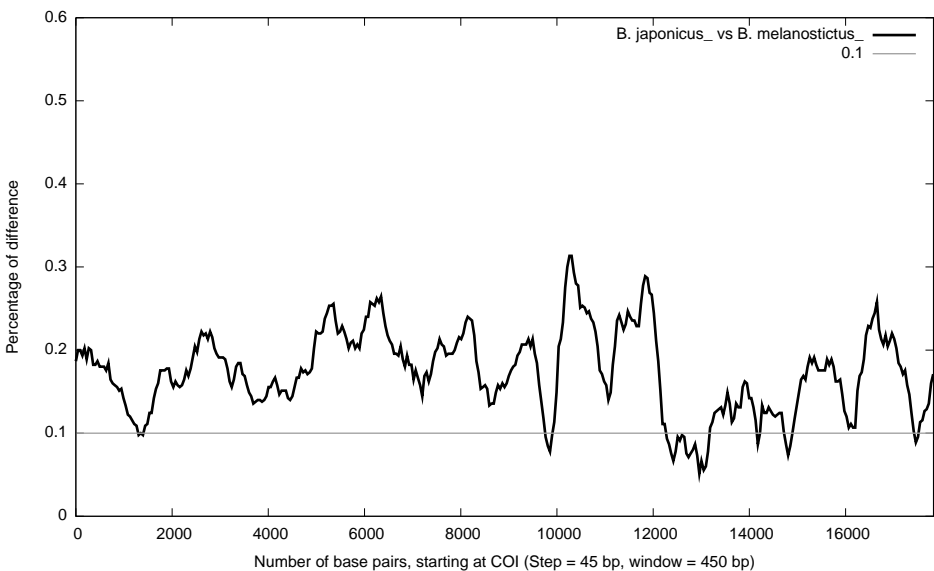

Supplement: S3 (10.1371/journal.pone.0051263.s003) [file journal.pone.0051263.s003]

# Moschidae

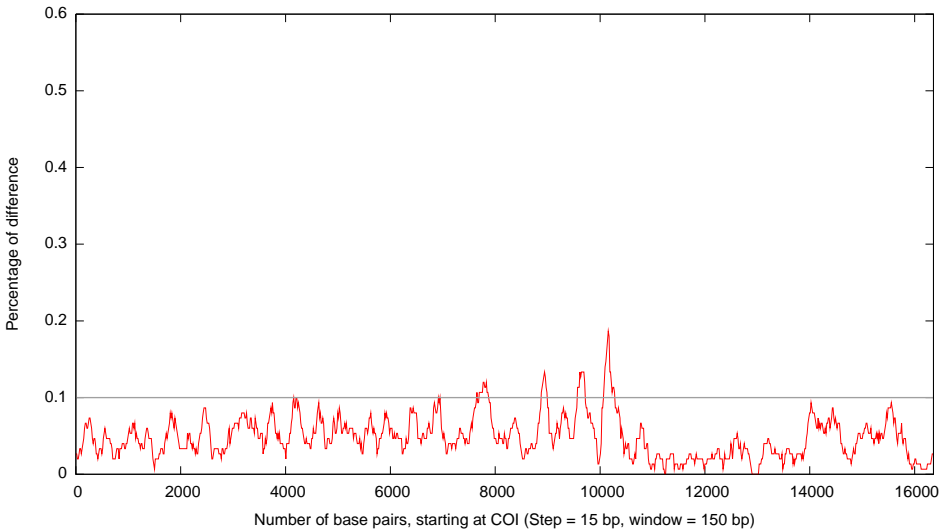

Supplement: S3 (10.1371/journal.pone.0051263.s003) [file journal.pone.0051263.s003]

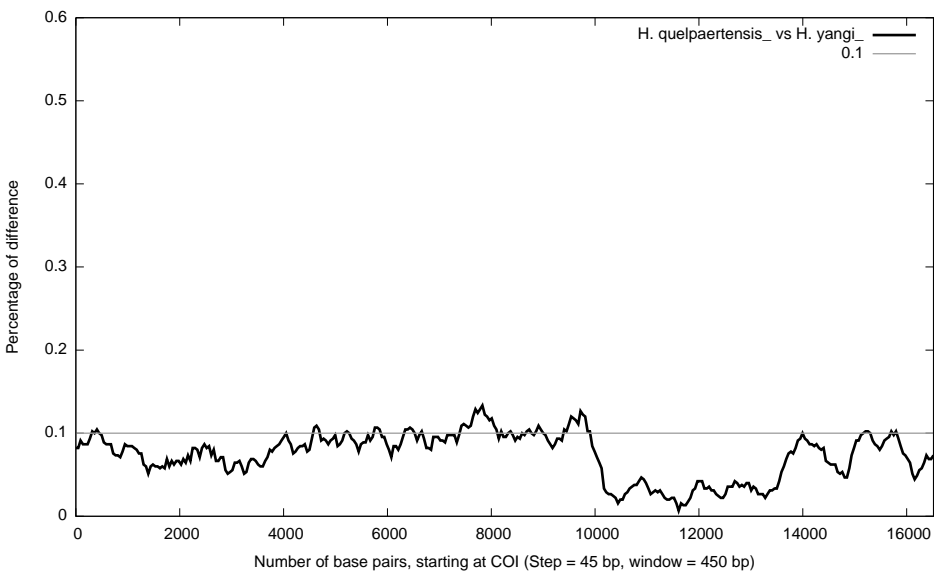

Supplement: S3 (10.1371/journal.pone.0051263.s003) [file journal.pone.0051263.s003]

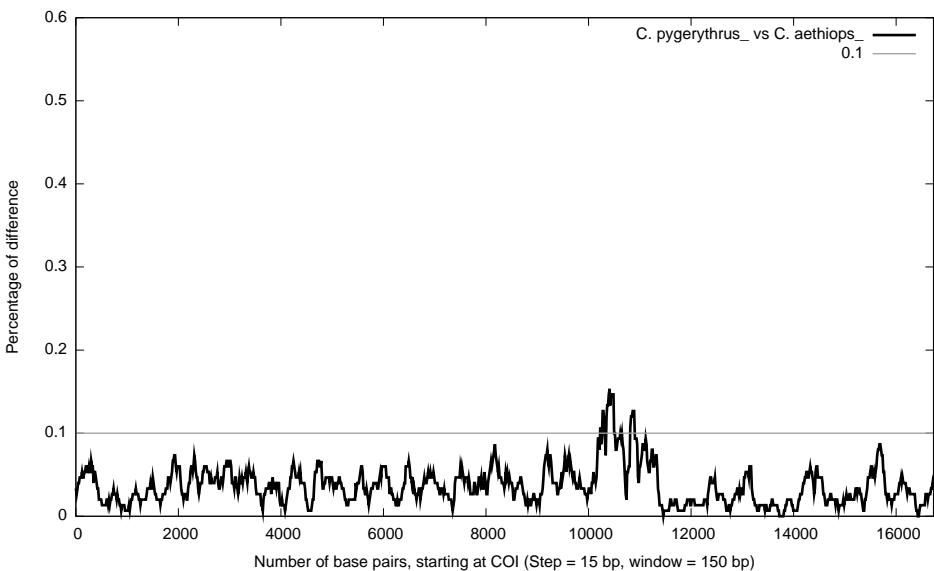

Supplement: S3 (10.1371/journal.pone.0051263.s003) [file journal.pone.0051263.s003]

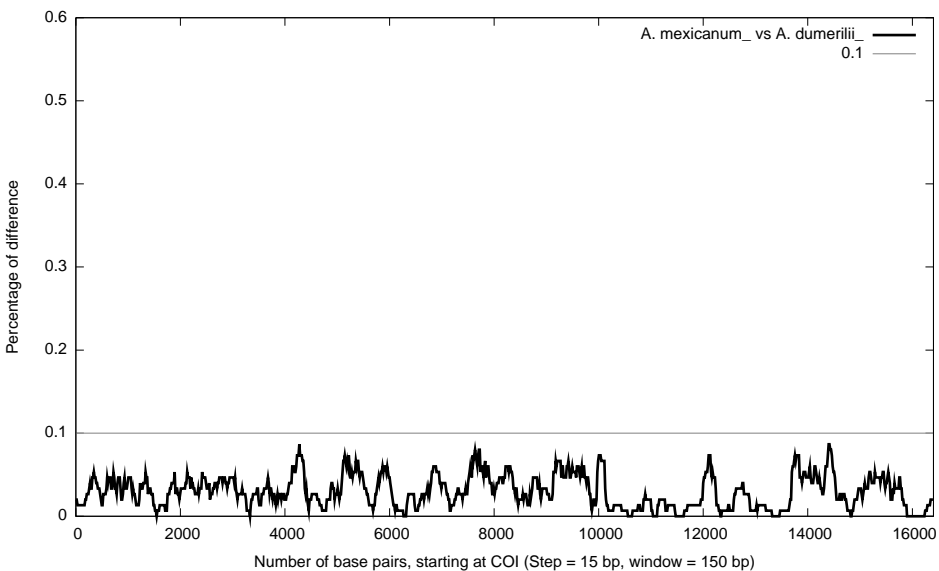

Supplement: S3 (10.1371/journal.pone.0051263.s003) [file journal.pone.0051263.s003]

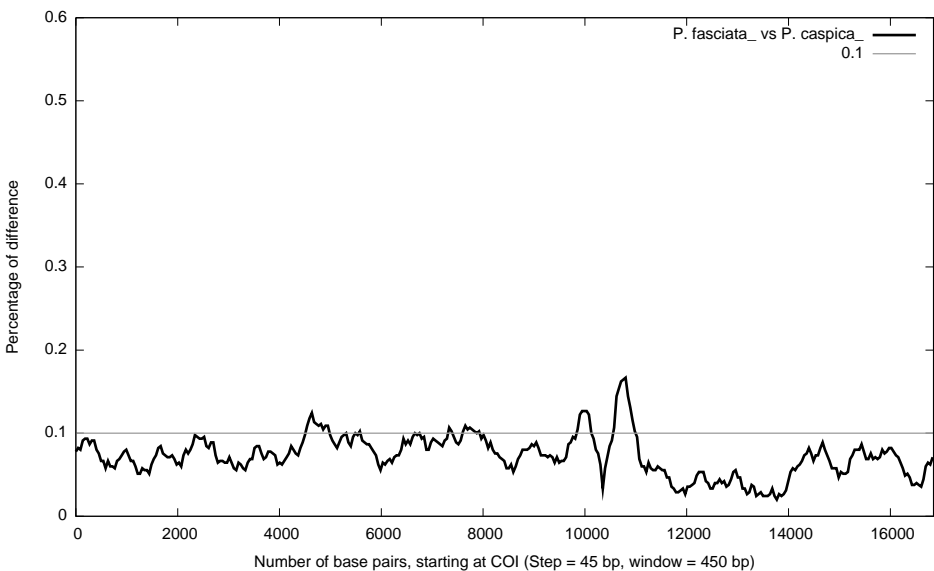

Supplement: S3 (10.1371/journal.pone.0051263.s003) [file journal.pone.0051263.s003]

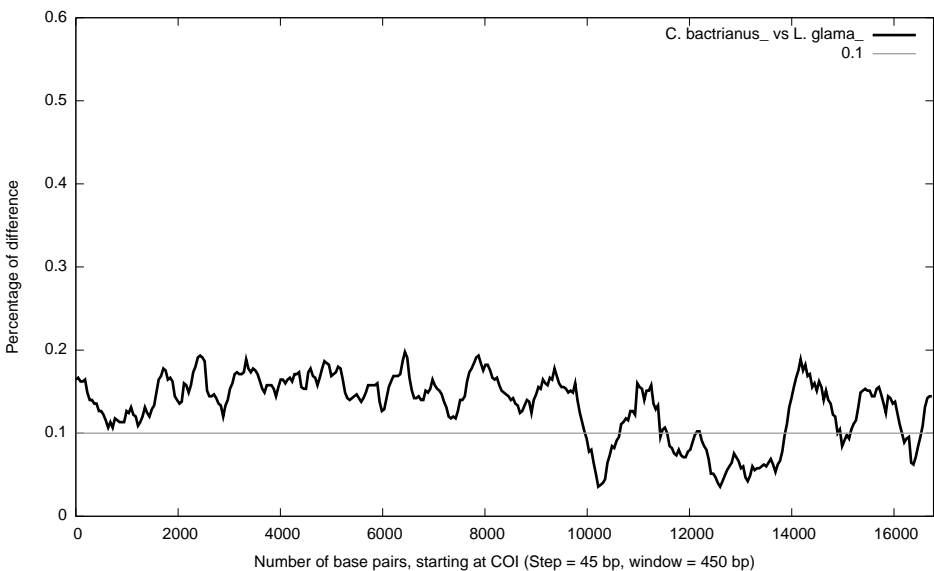

Supplement: S3 (10.1371/journal.pone.0051263.s003) [file journal.pone.0051263.s003]

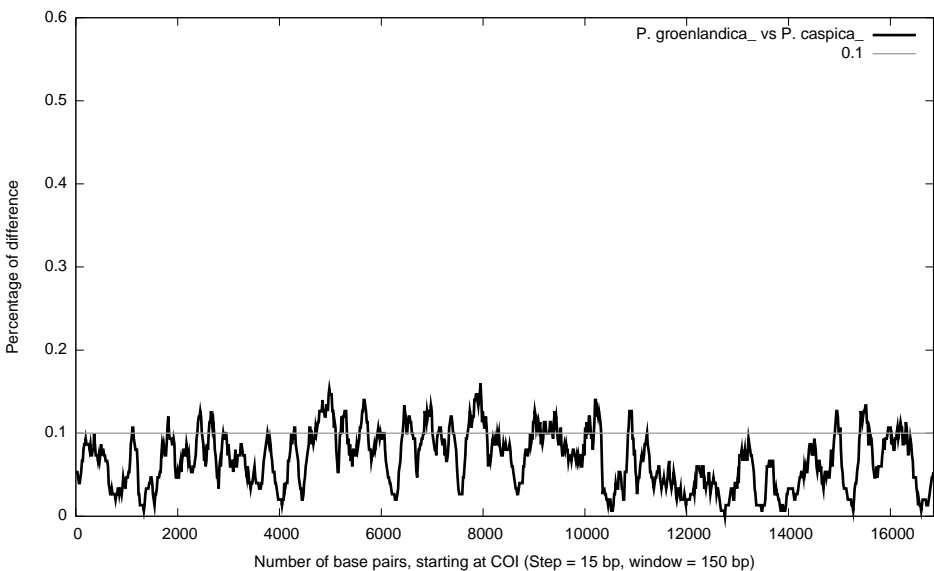

Supplement: S3 (10.1371/journal.pone.0051263.s003) [file journal.pone.0051263.s003]

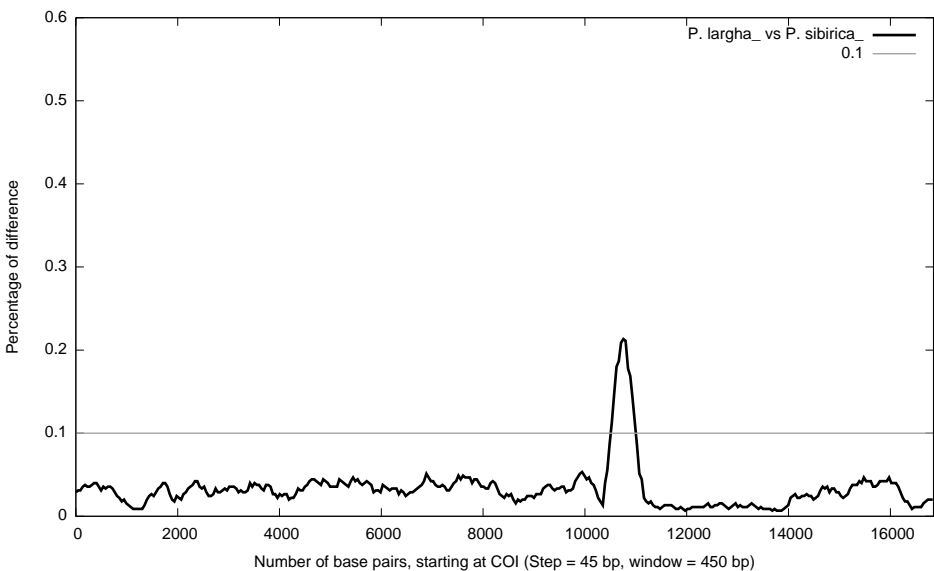

Supplement: S3 (10.1371/journal.pone.0051263.s003) [file journal.pone.0051263.s003]

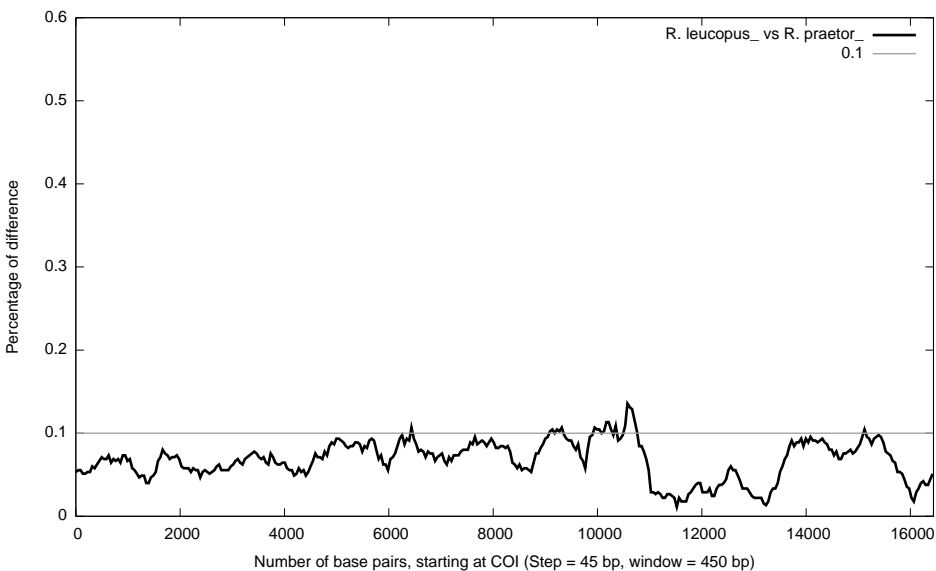

Supplement: S3 (10.1371/journal.pone.0051263.s003) [file journal.pone.0051263.s003]

# Bombinatoridae

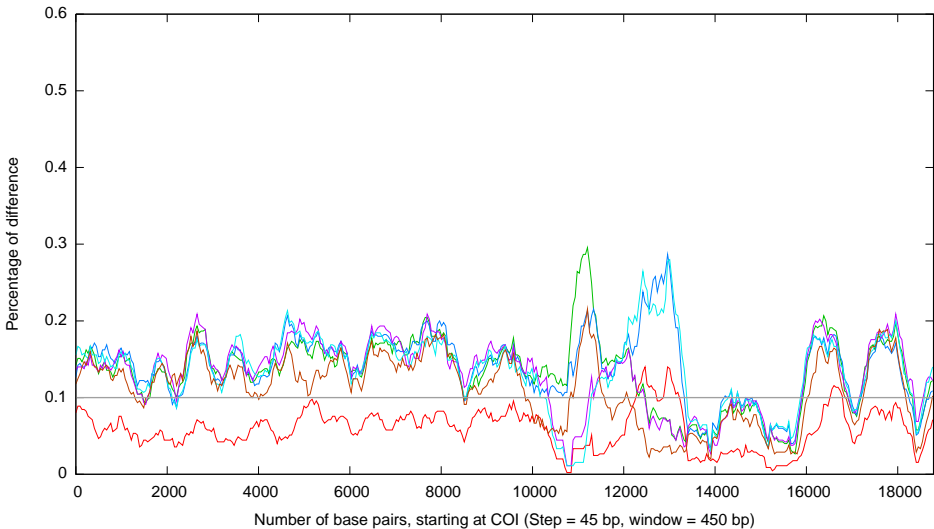

Supplement: S3 (10.1371/journal.pone.0051263.s003) [file journal.pone.0051263.s003]

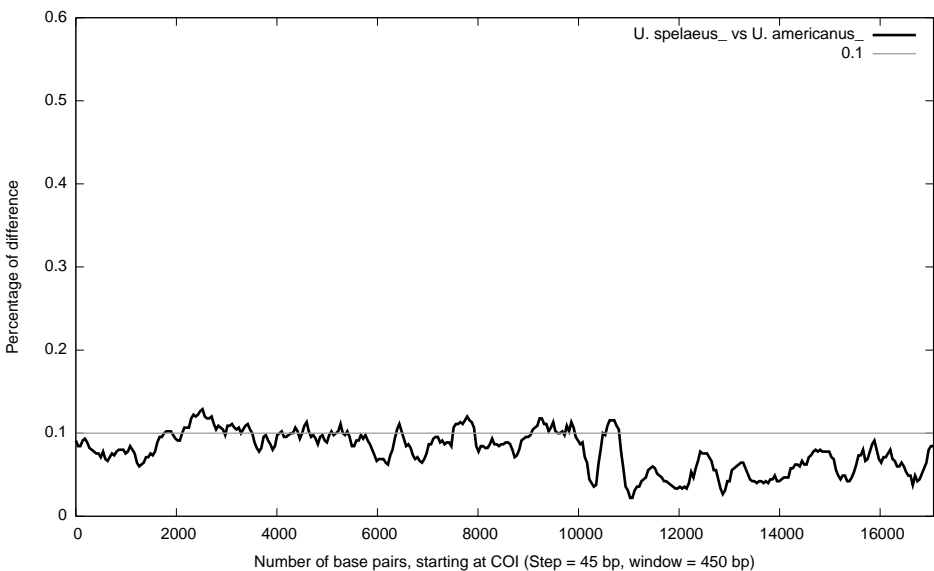

Supplement: S3 (10.1371/journal.pone.0051263.s003) [file journal.pone.0051263.s003]

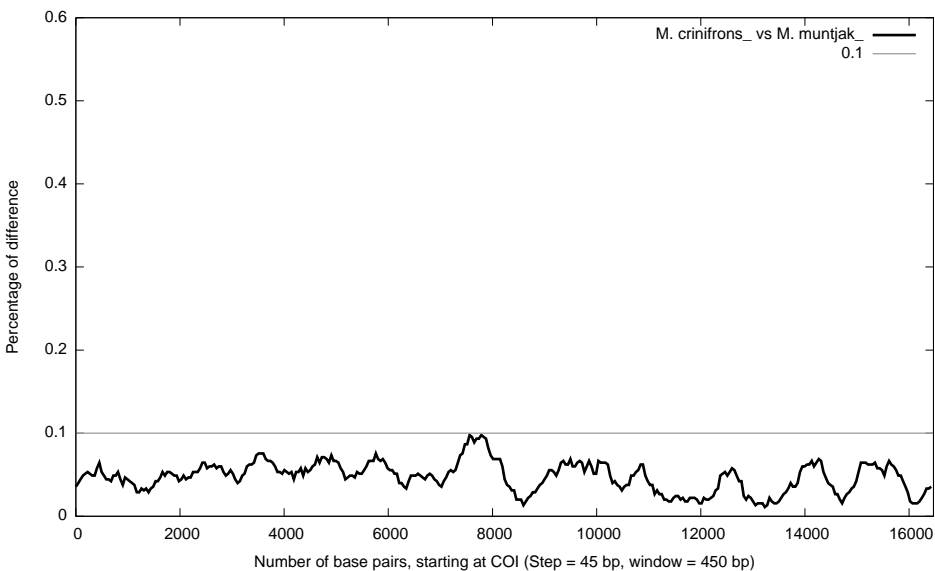

Supplement: S3 (10.1371/journal.pone.0051263.s003) [file journal.pone.0051263.s003]

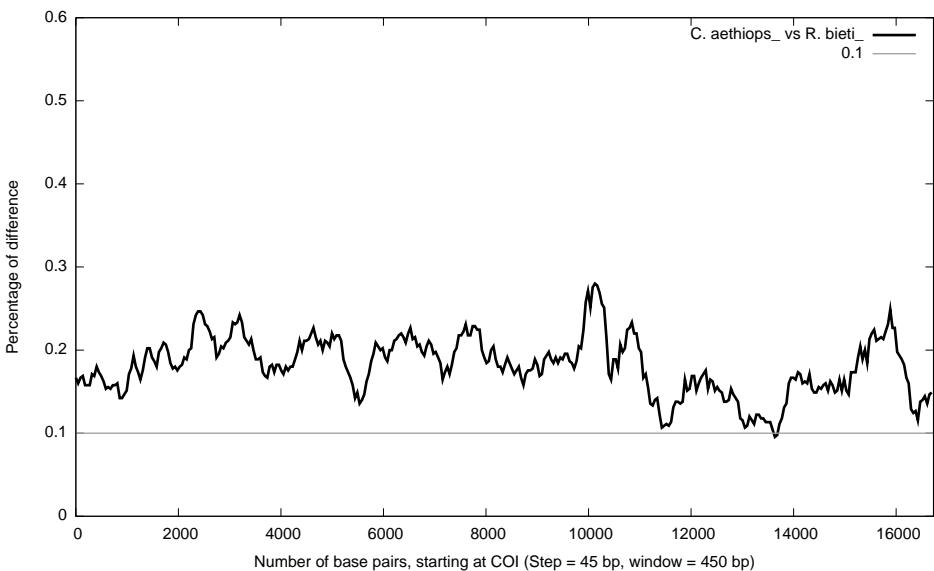

Supplement: S3 (10.1371/journal.pone.0051263.s003) [file journal.pone.0051263.s003]

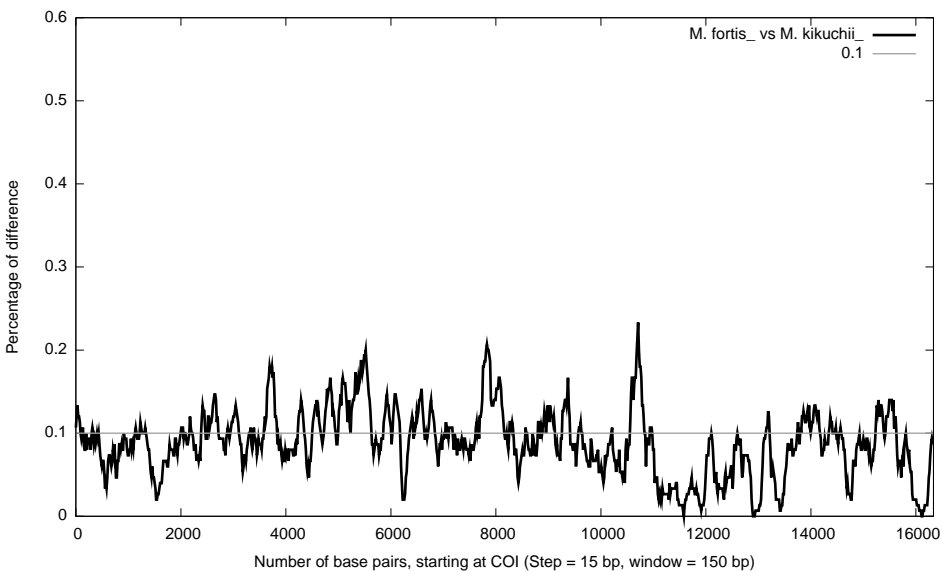

Supplement: S3 (10.1371/journal.pone.0051263.s003) [file journal.pone.0051263.s003]

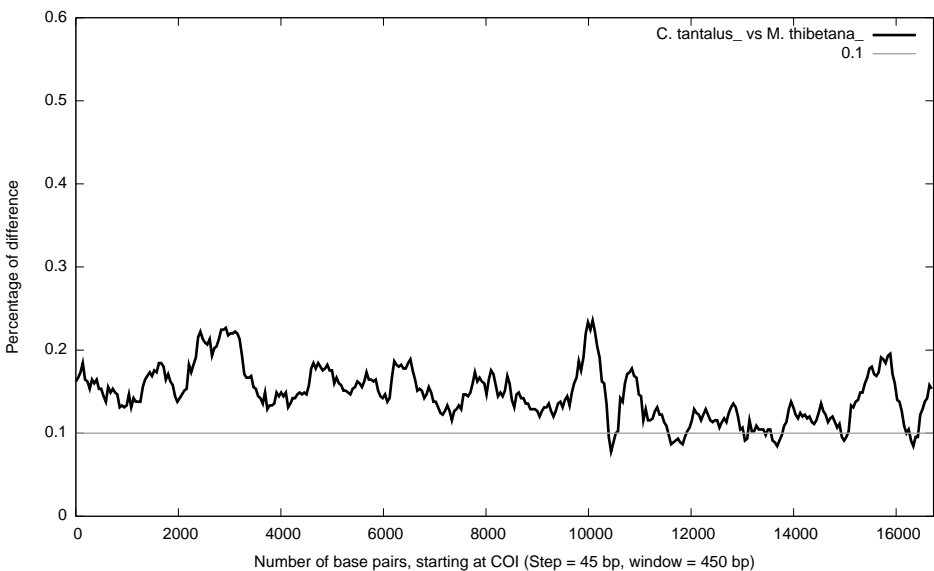

Supplement: S3 (10.1371/journal.pone.0051263.s003) [file journal.pone.0051263.s003]

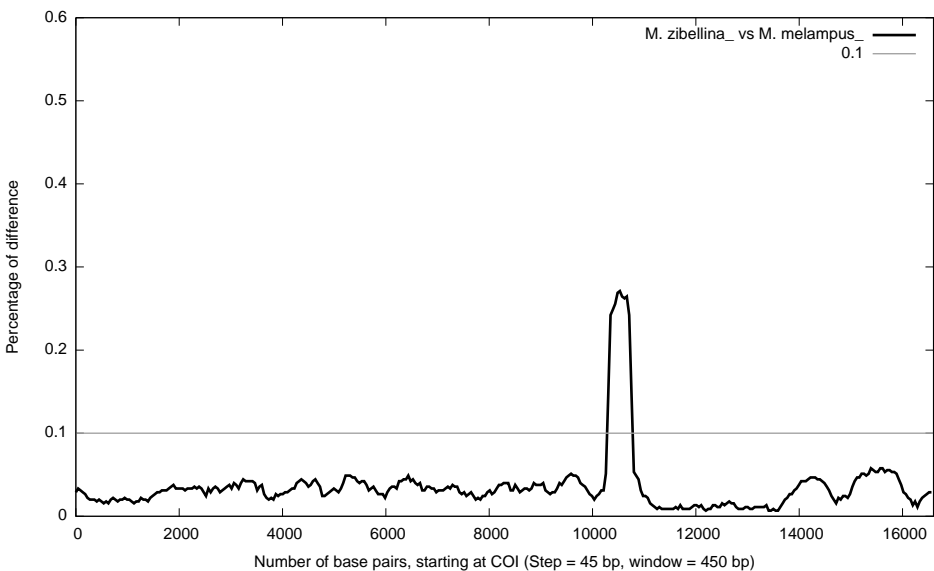

Supplement: S3 (10.1371/journal.pone.0051263.s003) [file journal.pone.0051263.s003]

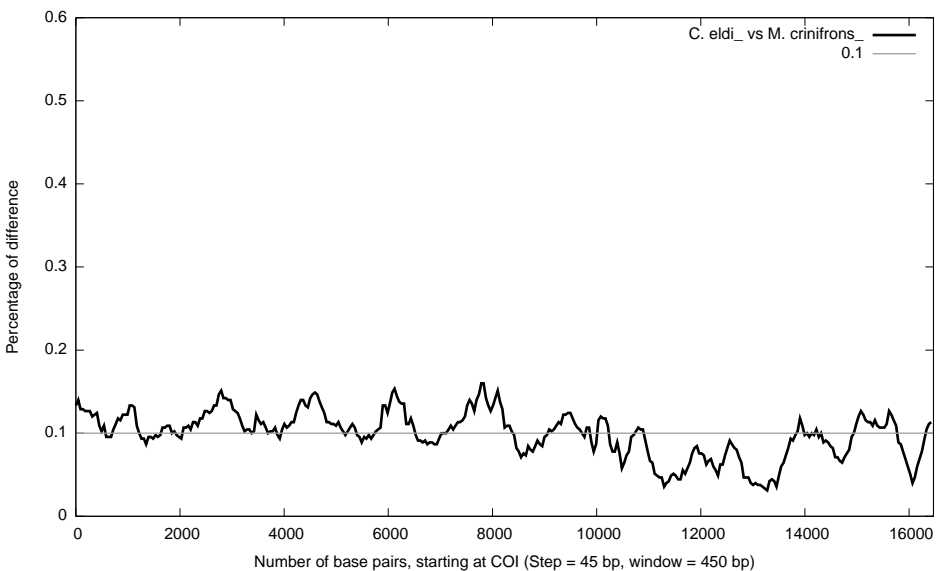

Supplement: S3 (10.1371/journal.pone.0051263.s003) [file journal.pone.0051263.s003]

# Otariidae

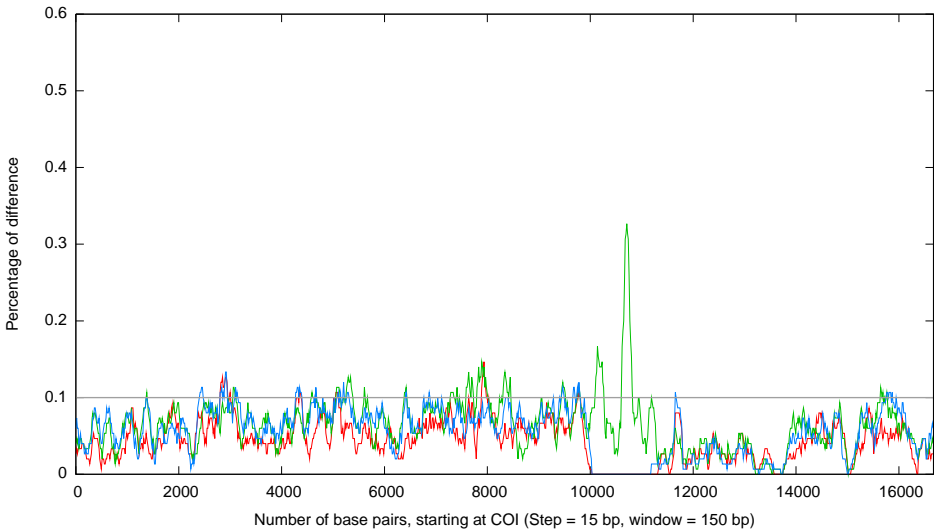

Supplement: S3 (10.1371/journal.pone.0051263.s003) [file journal.pone.0051263.s003]

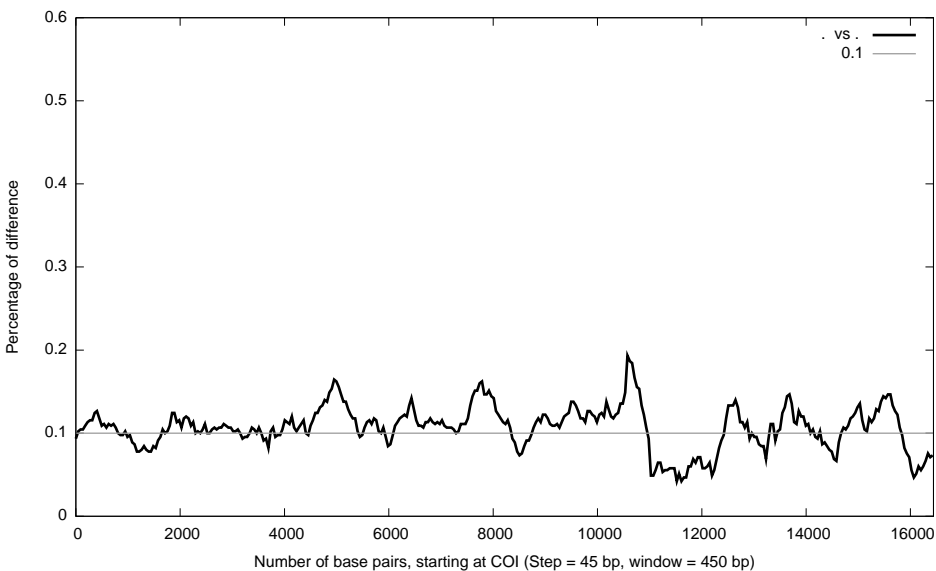

Supplement: S3 (10.1371/journal.pone.0051263.s003) [file journal.pone.0051263.s003]

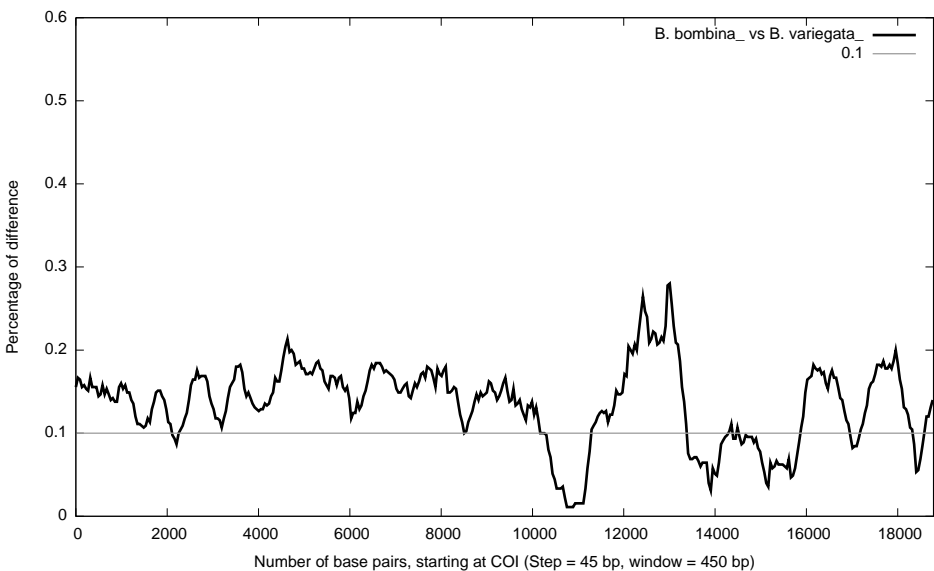

Supplement: S3 (10.1371/journal.pone.0051263.s003) [file journal.pone.0051263.s003]

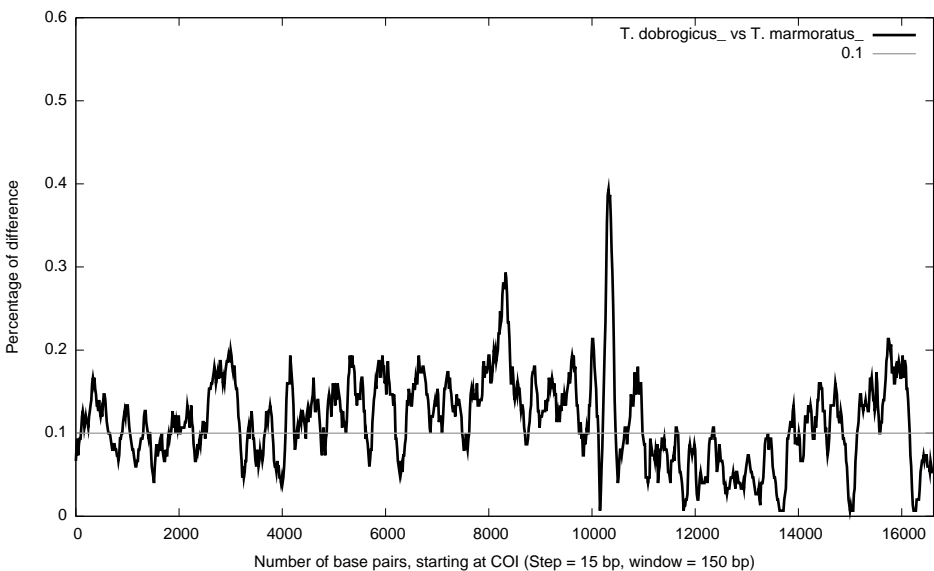

Supplement: S3 (10.1371/journal.pone.0051263.s003) [file journal.pone.0051263.s003]

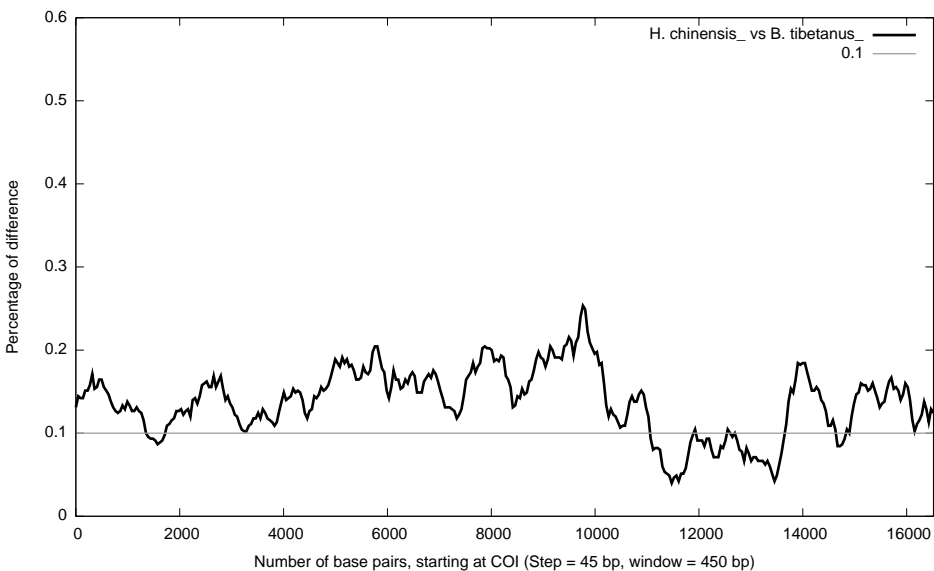

Supplement: S3 (10.1371/journal.pone.0051263.s003) [file journal.pone.0051263.s003]

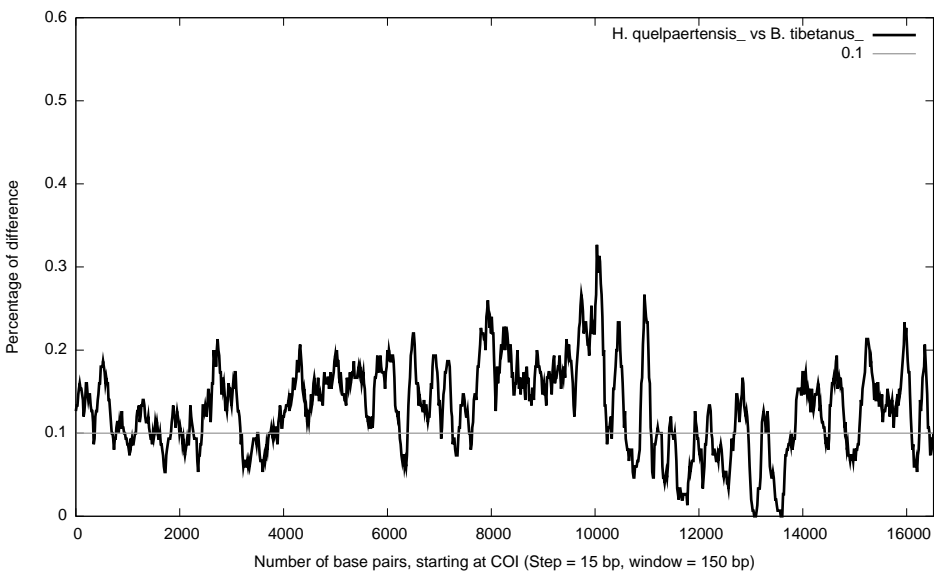

Supplement: S3 (10.1371/journal.pone.0051263.s003) [file journal.pone.0051263.s003]

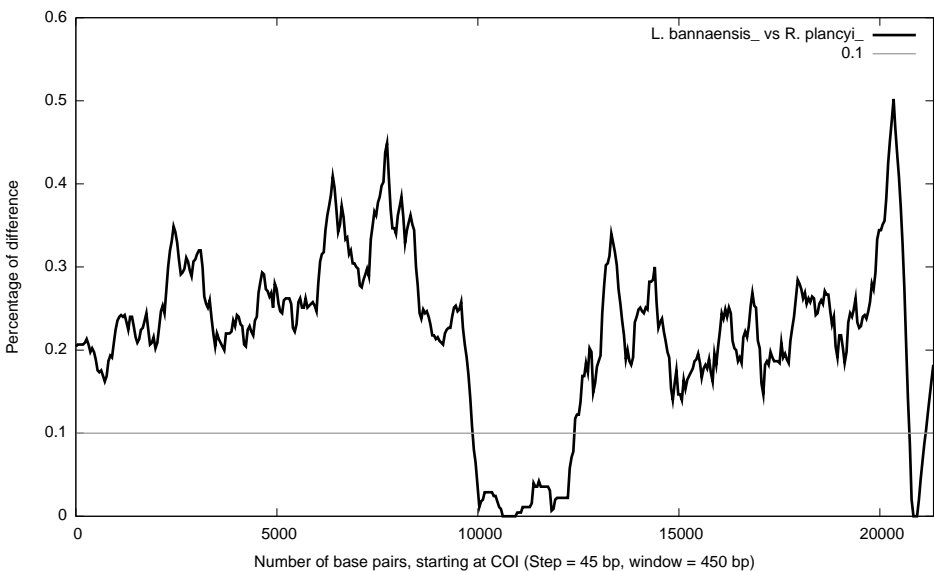

Supplement: S3 (10.1371/journal.pone.0051263.s003) [file journal.pone.0051263.s003]

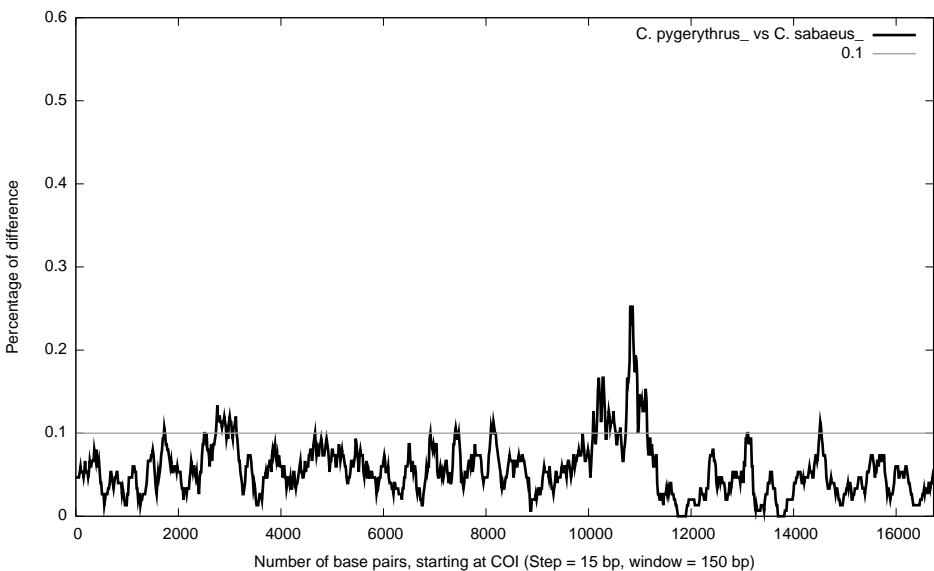

Supplement: S3 (10.1371/journal.pone.0051263.s003) [file journal.pone.0051263.s003]

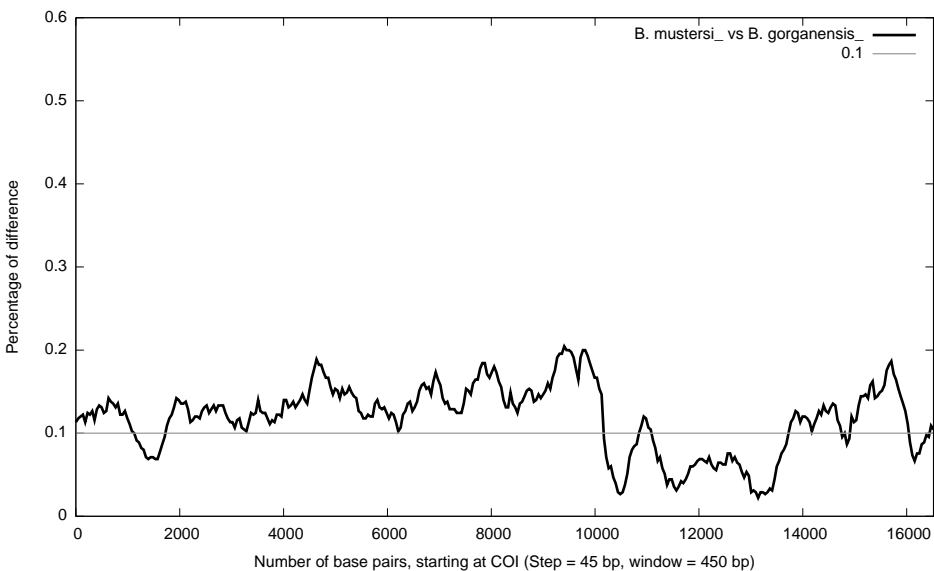

Supplement: S3 (10.1371/journal.pone.0051263.s003) [file journal.pone.0051263.s003]

# Hynobiidae

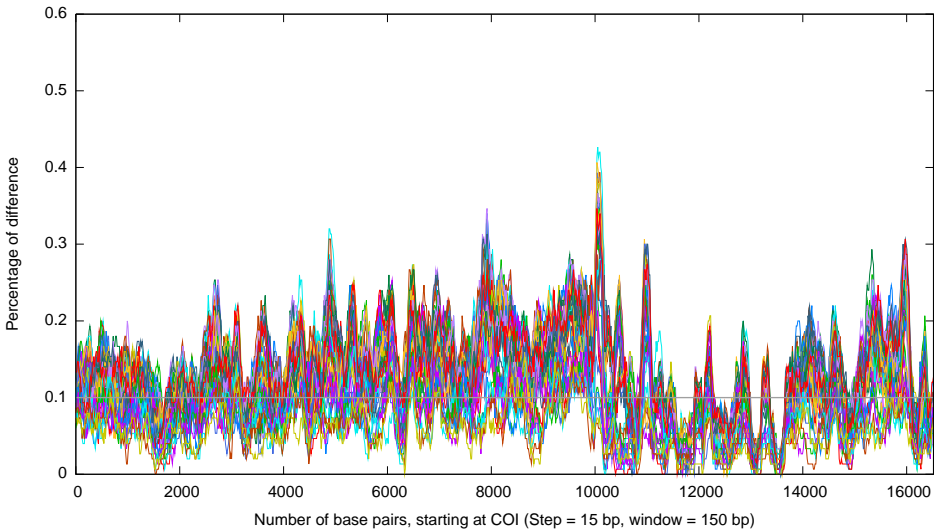

Supplement: S3 (10.1371/journal.pone.0051263.s003) [file journal.pone.0051263.s003]

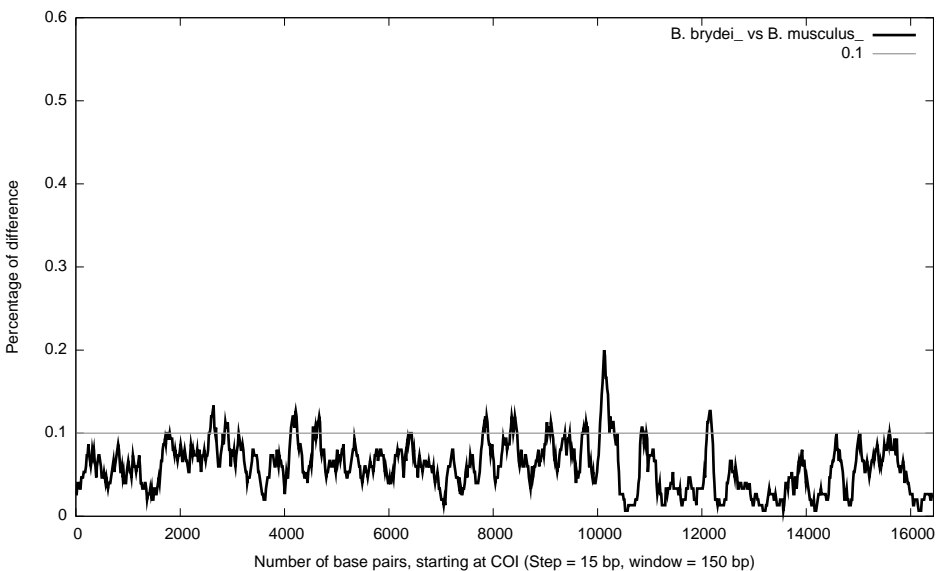

Supplement: S3 (10.1371/journal.pone.0051263.s003) [file journal.pone.0051263.s003]

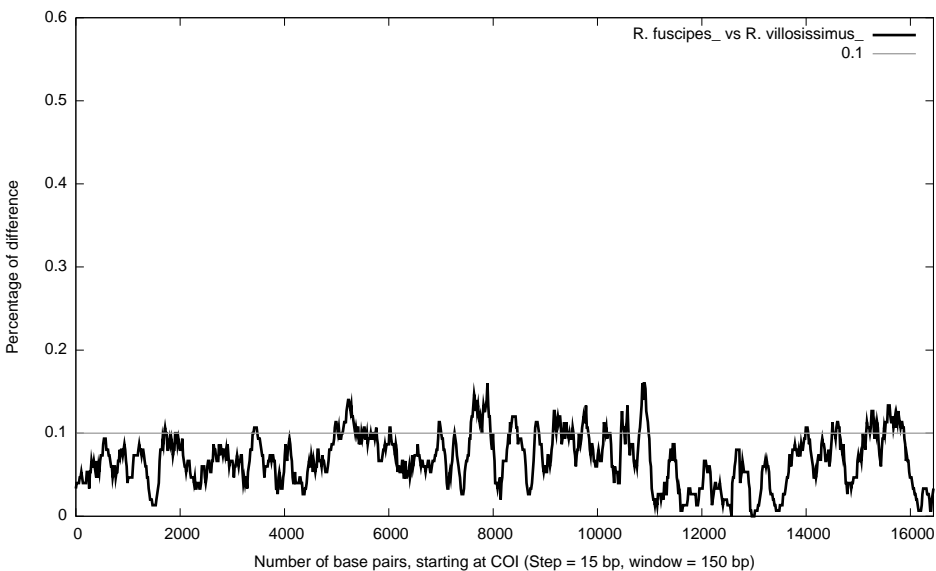

Supplement: S3 (10.1371/journal.pone.0051263.s003) [file journal.pone.0051263.s003]

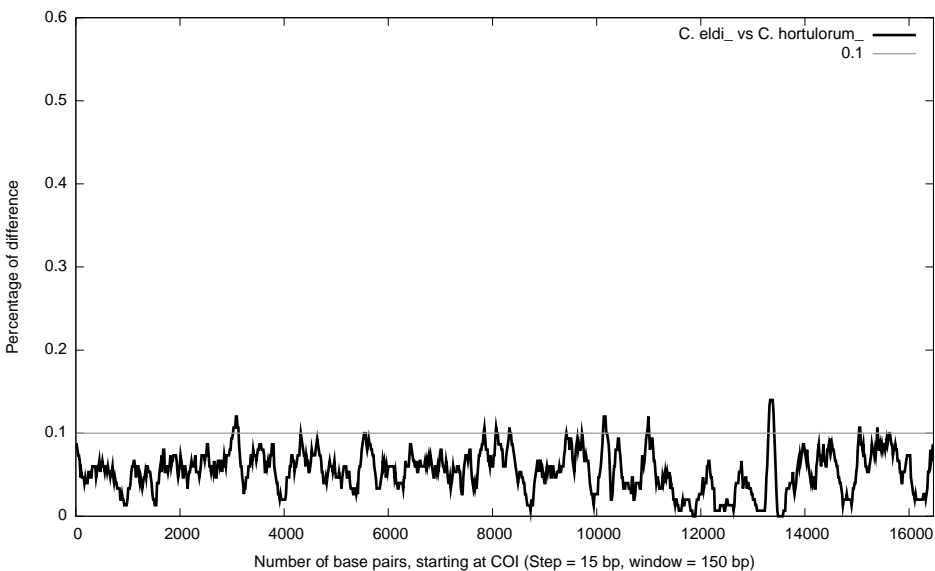

Supplement: S3 (10.1371/journal.pone.0051263.s003) [file journal.pone.0051263.s003]

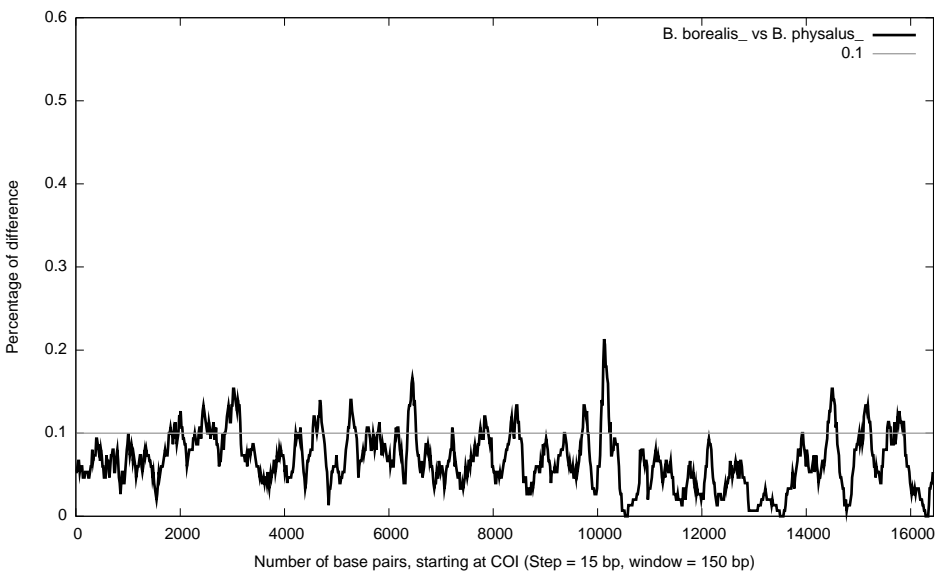

Supplement: S3 (10.1371/journal.pone.0051263.s003) [file journal.pone.0051263.s003]

# Cryptobranchidae

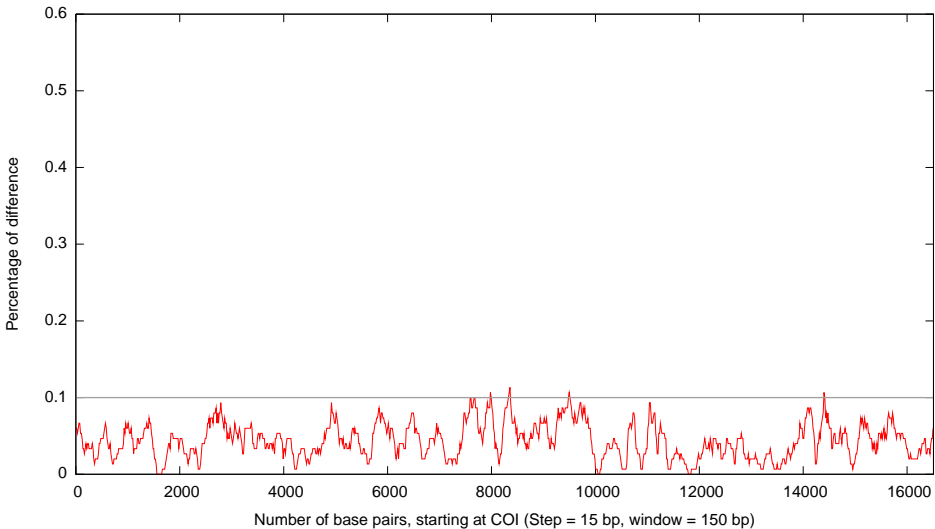

Supplement: S3 (10.1371/journal.pone.0051263.s003) [file journal.pone.0051263.s003]

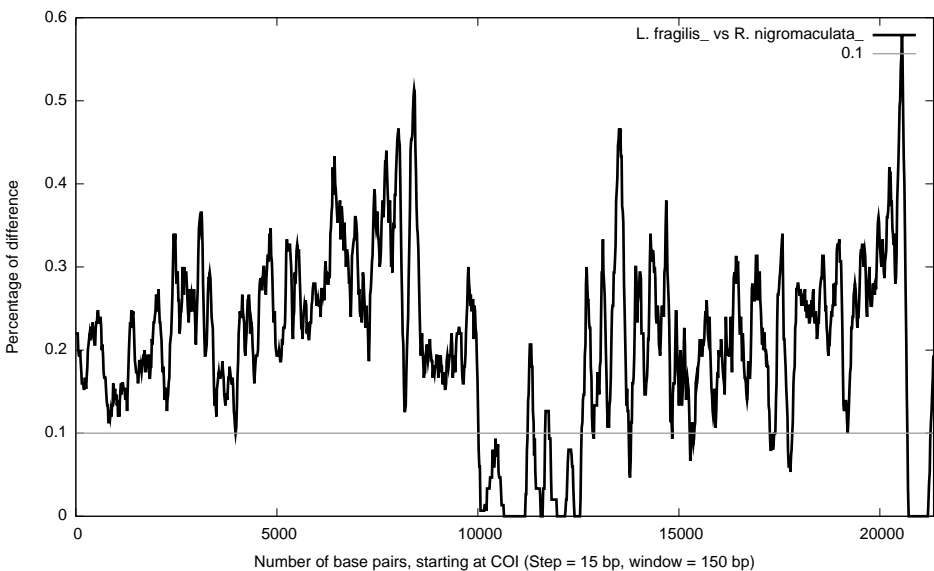

Supplement: S3 (10.1371/journal.pone.0051263.s003) [file journal.pone.0051263.s003]

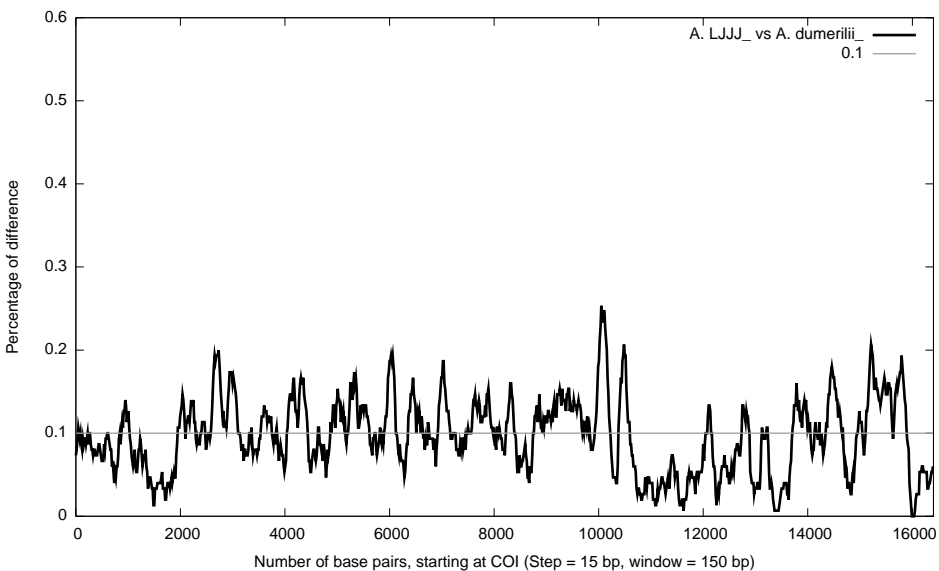

Supplement: S3 (10.1371/journal.pone.0051263.s003) [file journal.pone.0051263.s003]

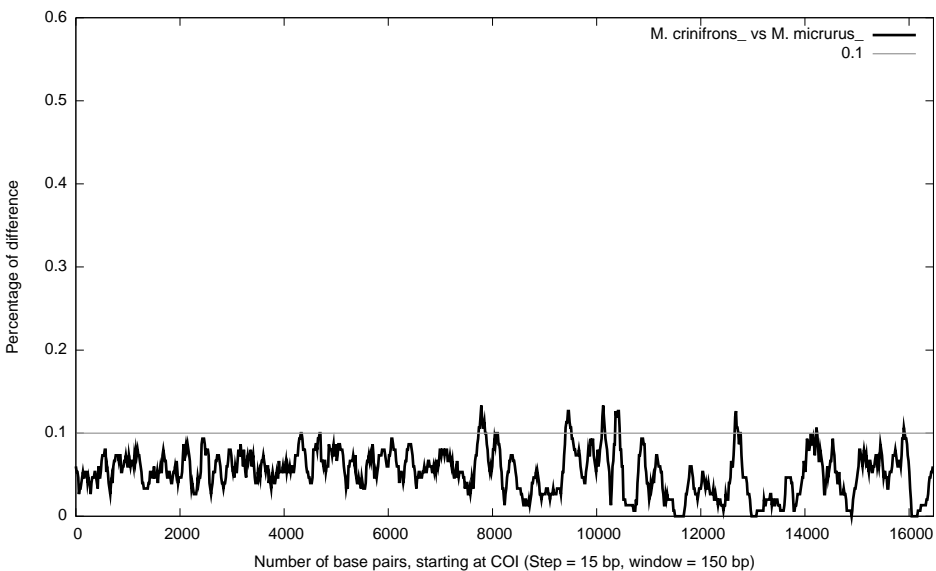

Supplement: S3 (10.1371/journal.pone.0051263.s003) [file journal.pone.0051263.s003]

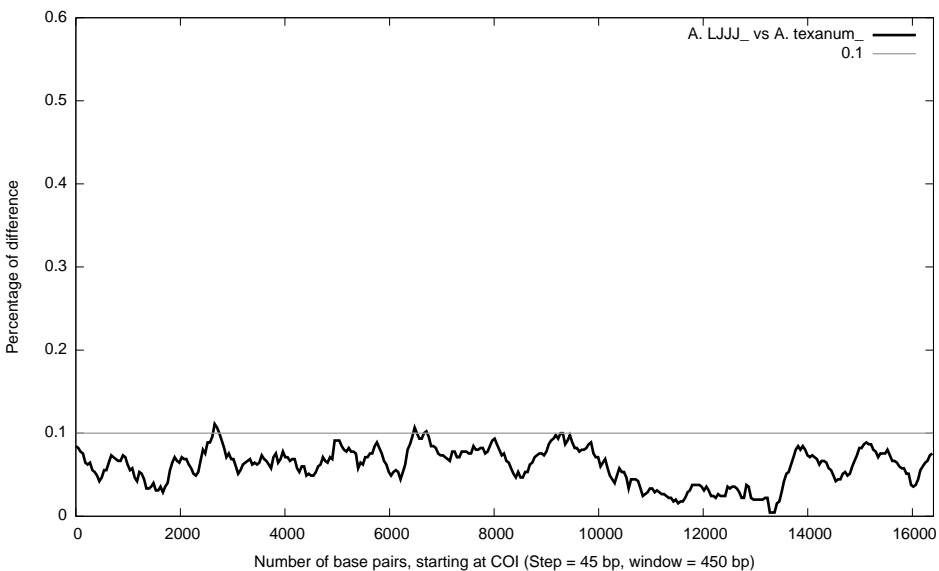

Supplement: S3 (10.1371/journal.pone.0051263.s003) [file journal.pone.0051263.s003]

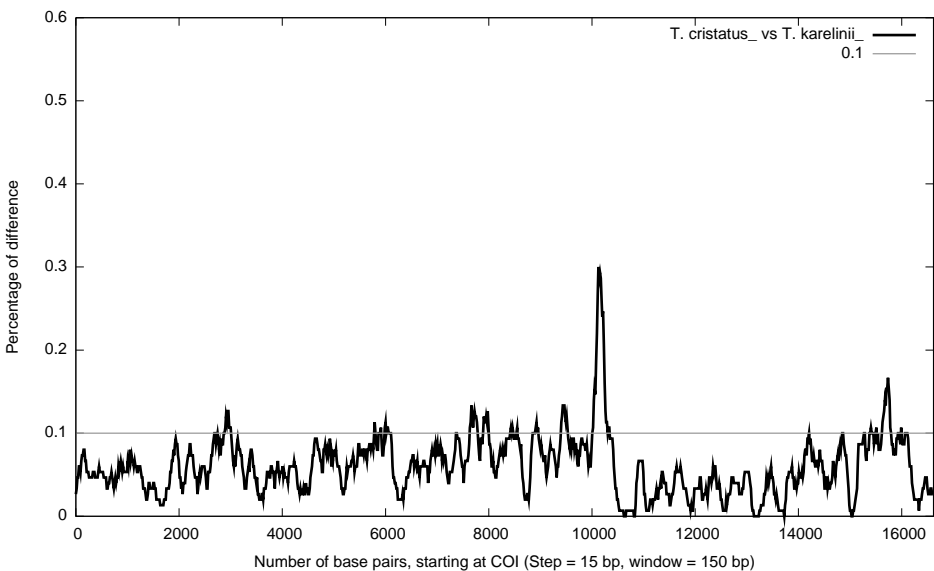

Supplement: S3 (10.1371/journal.pone.0051263.s003) [file journal.pone.0051263.s003]

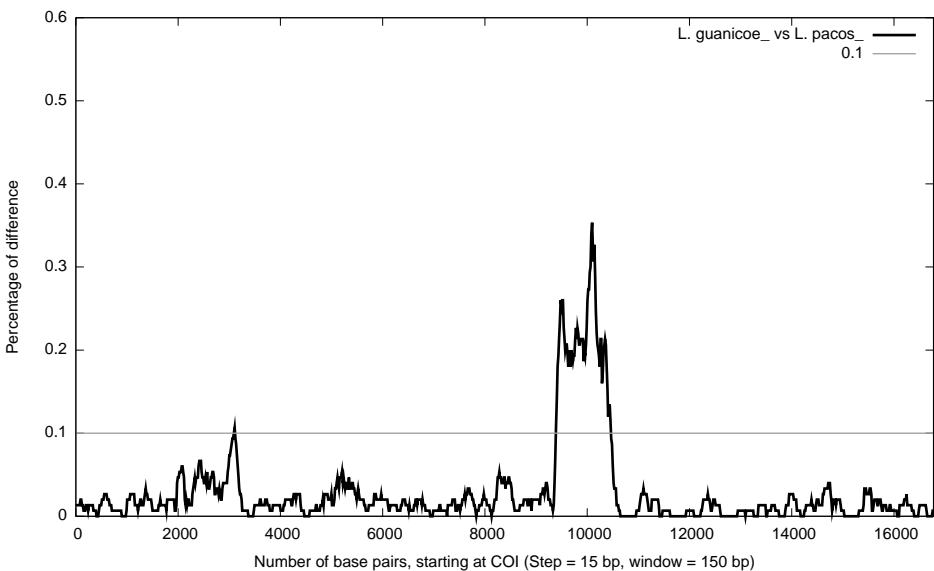

Supplement: S3 (10.1371/journal.pone.0051263.s003) [file journal.pone.0051263.s003]

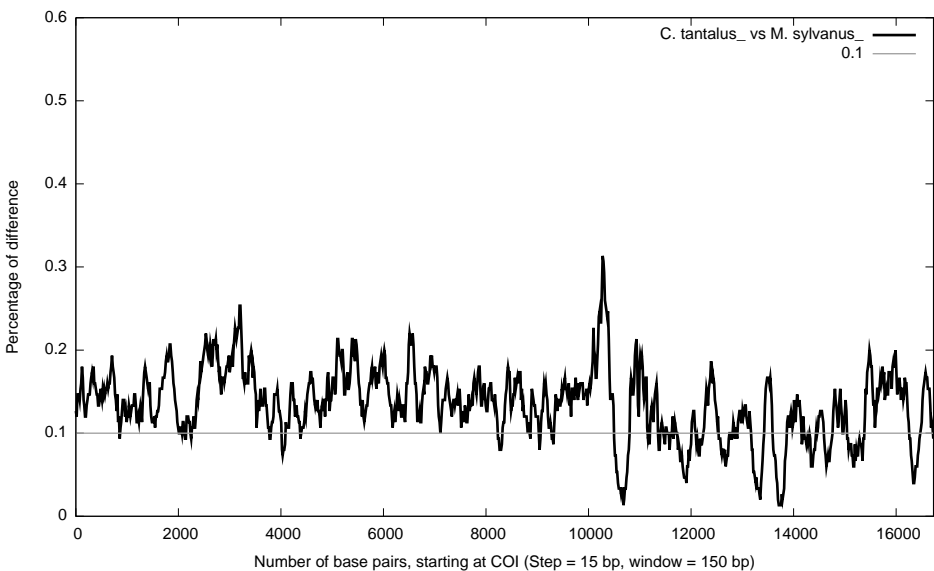

Supplement: S3 (10.1371/journal.pone.0051263.s003) [file journal.pone.0051263.s003]

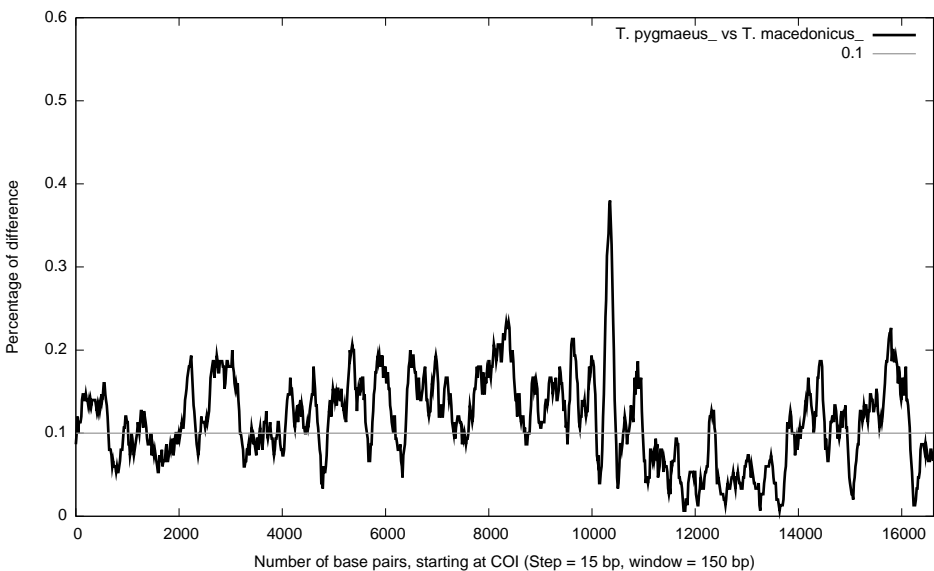

Supplement: S3 (10.1371/journal.pone.0051263.s003) [file journal.pone.0051263.s003]

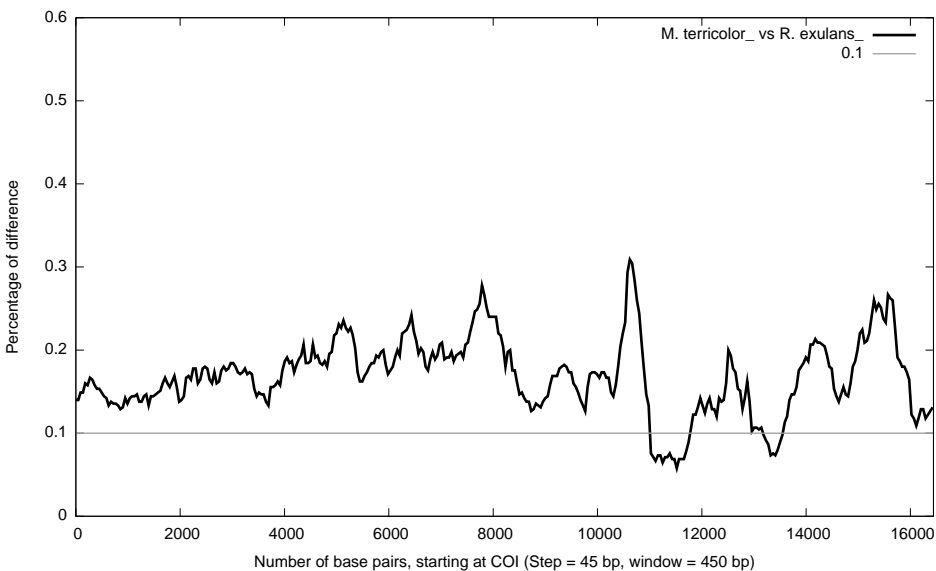

Supplement: S3 (10.1371/journal.pone.0051263.s003) [file journal.pone.0051263.s003]

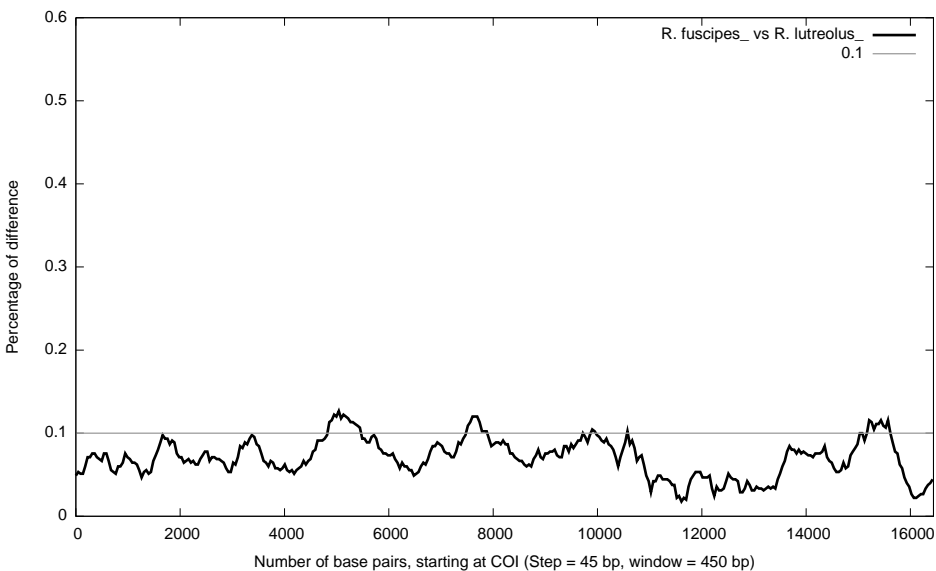

Supplement: S3 (10.1371/journal.pone.0051263.s003) [file journal.pone.0051263.s003]

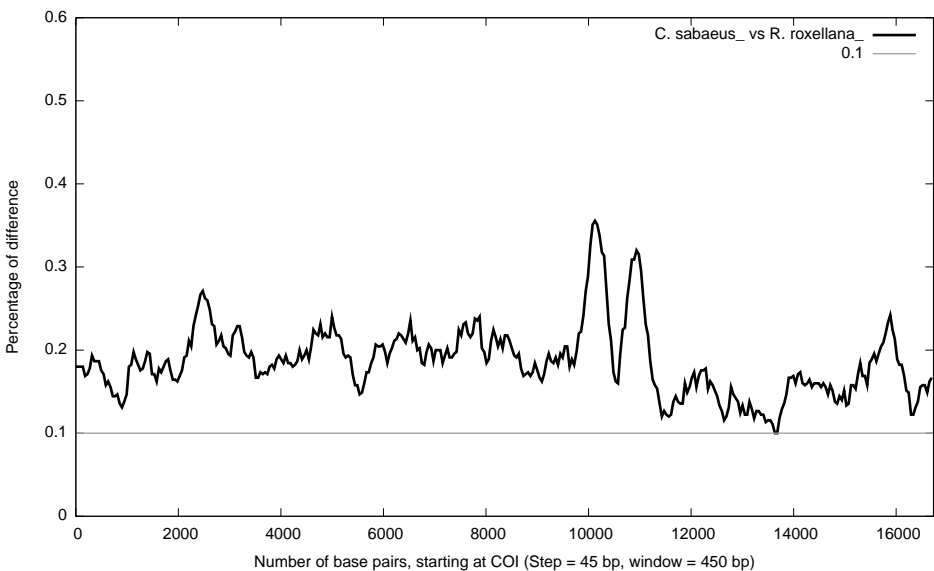

Supplement: S3 (10.1371/journal.pone.0051263.s003) [file journal.pone.0051263.s003]

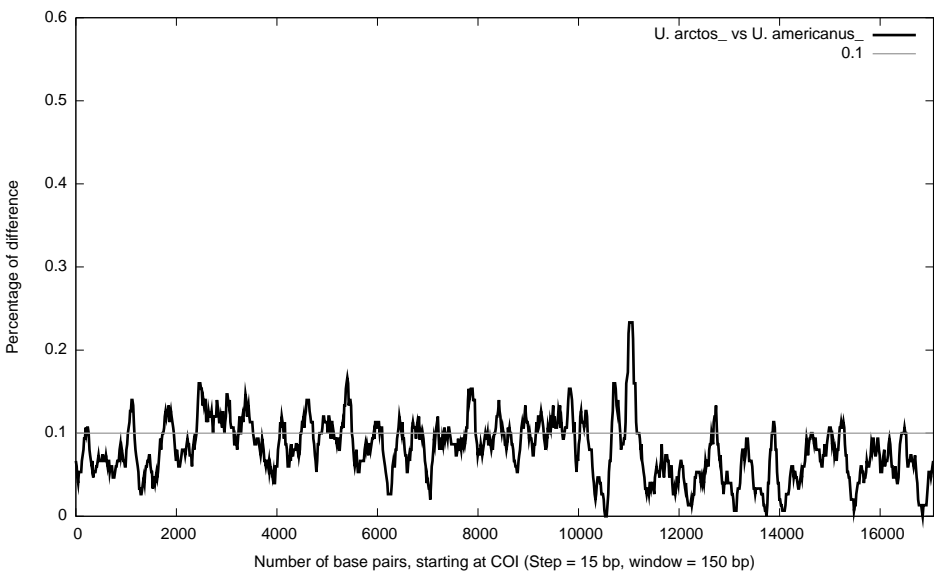

Supplement: S3 (10.1371/journal.pone.0051263.s003) [file journal.pone.0051263.s003]

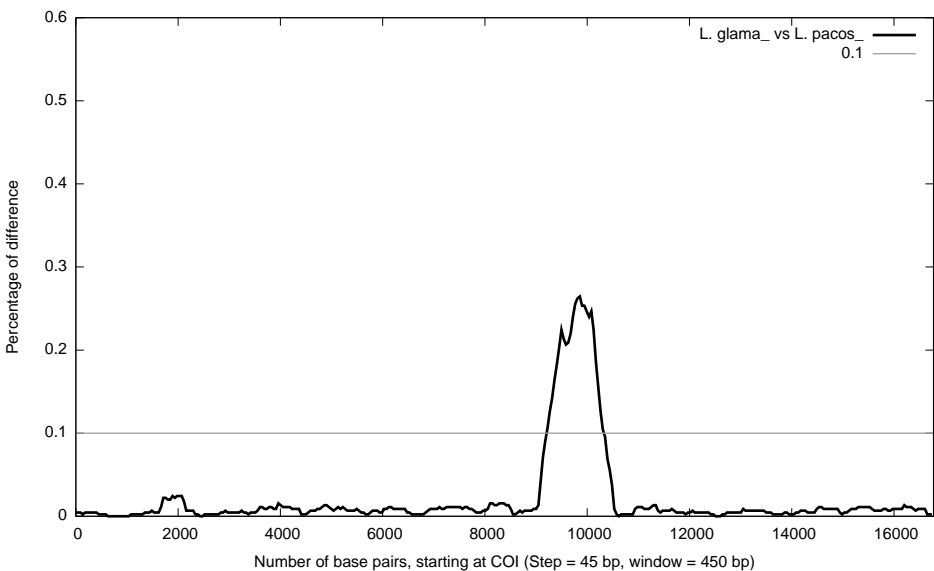

Supplement: S3 (10.1371/journal.pone.0051263.s003) [file journal.pone.0051263.s003]

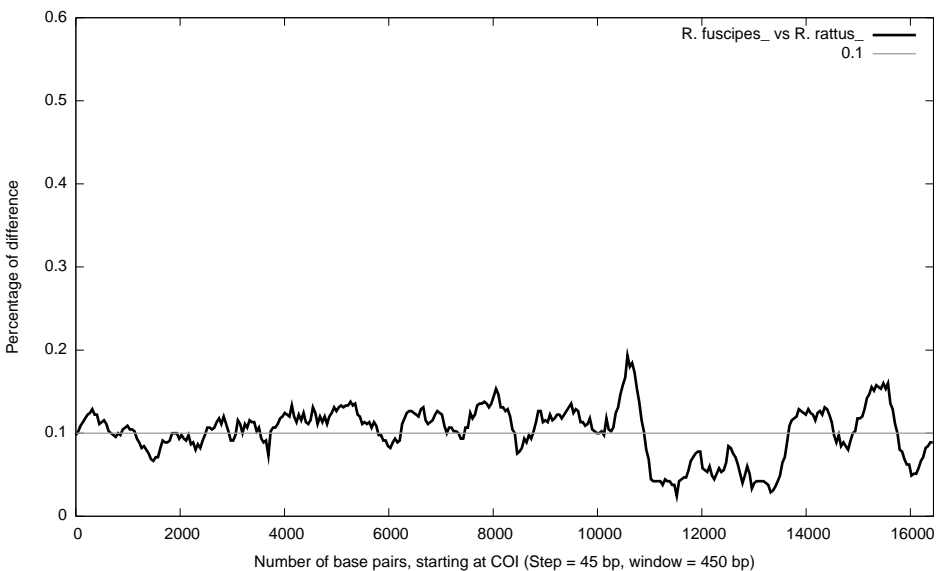

Supplement: S3 (10.1371/journal.pone.0051263.s003) [file journal.pone.0051263.s003]

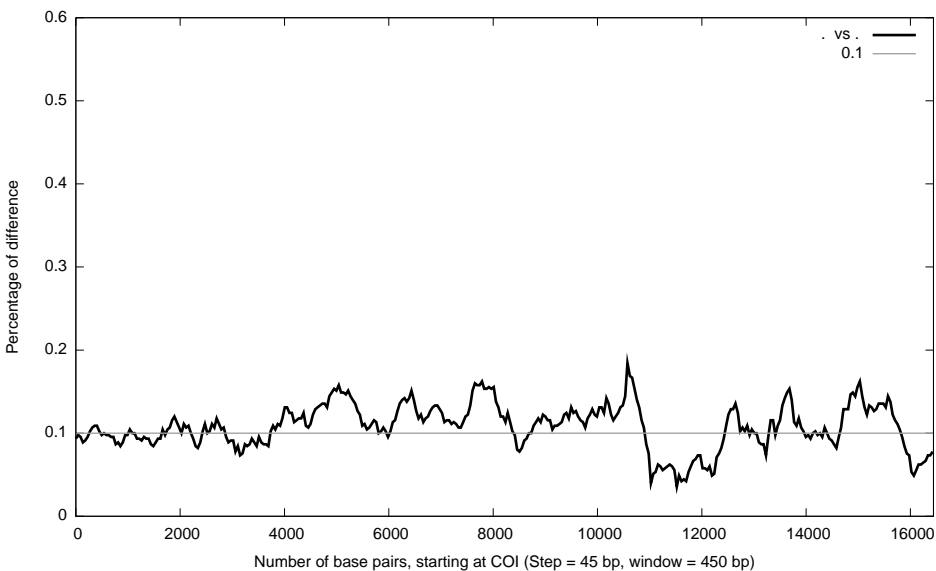

Supplement: S3 (10.1371/journal.pone.0051263.s003) [file journal.pone.0051263.s003]

# Cervidae

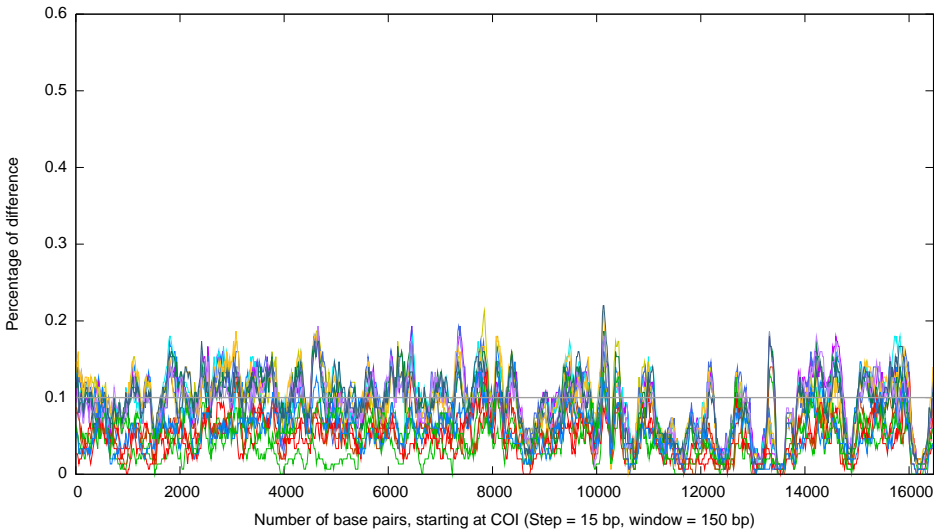

Supplement: S3 (10.1371/journal.pone.0051263.s003) [file journal.pone.0051263.s003]

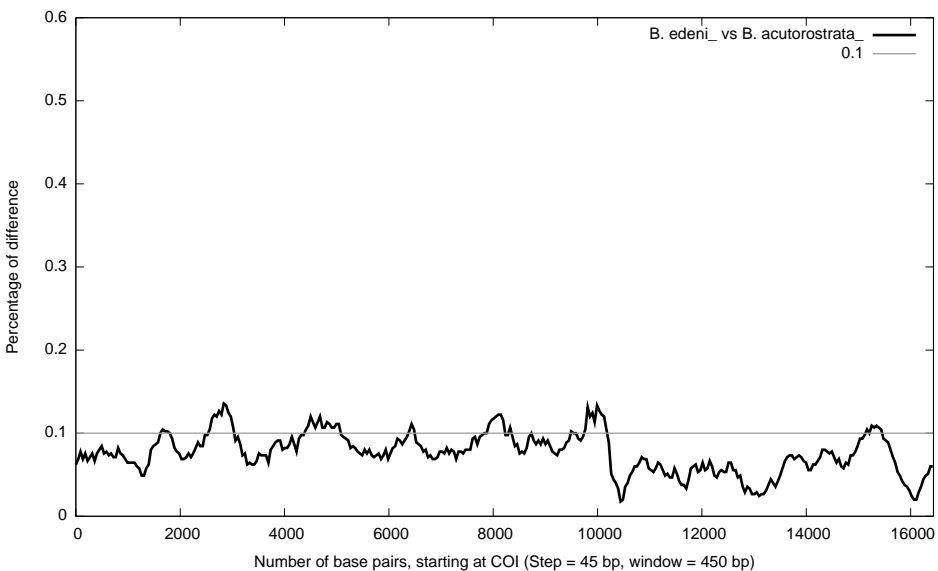

Supplement: S3 (10.1371/journal.pone.0051263.s003) [file journal.pone.0051263.s003]

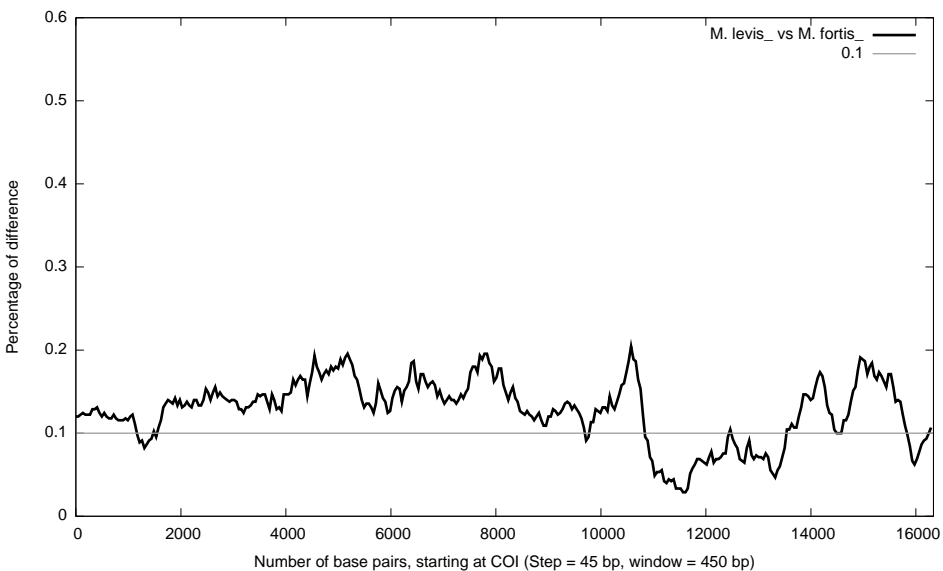

Supplement: S3 (10.1371/journal.pone.0051263.s003) [file journal.pone.0051263.s003]

# Muridae

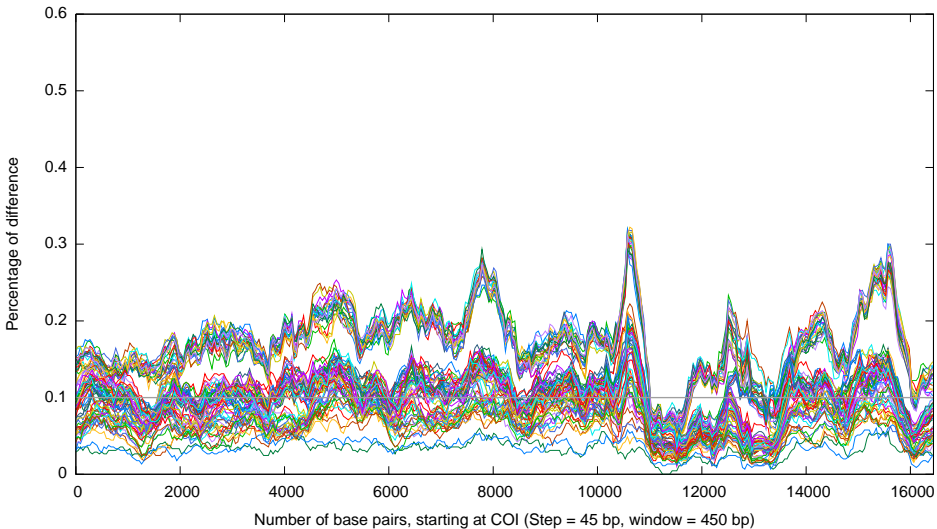

Supplement: S3 (10.1371/journal.pone.0051263.s003) [file journal.pone.0051263.s003]

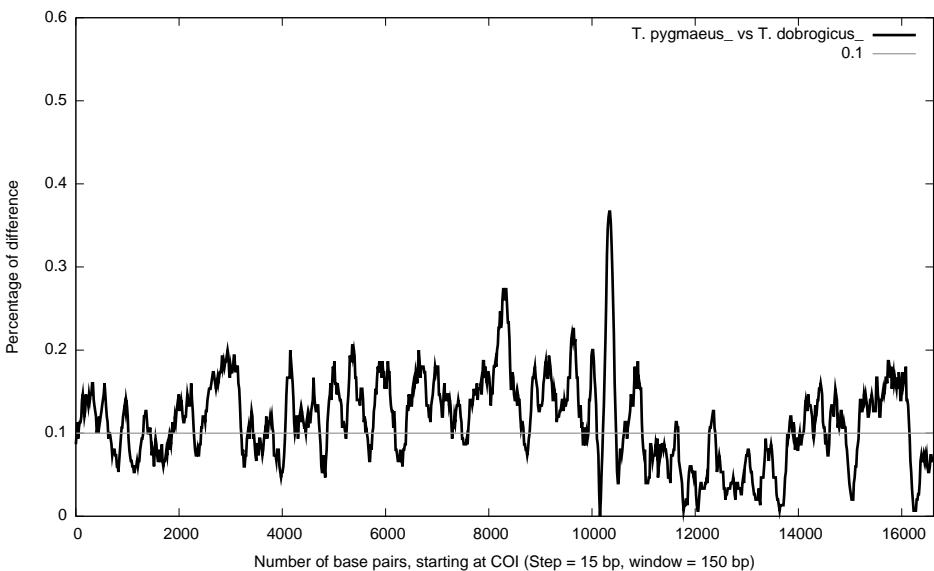

Supplement: S3 (10.1371/journal.pone.0051263.s003) [file journal.pone.0051263.s003]

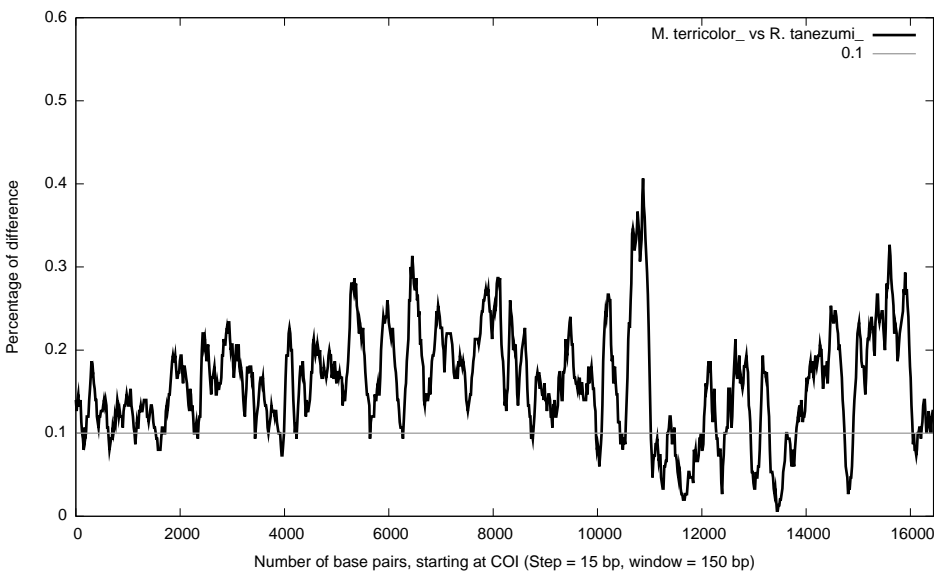

Supplement: S3 (10.1371/journal.pone.0051263.s003) [file journal.pone.0051263.s003]

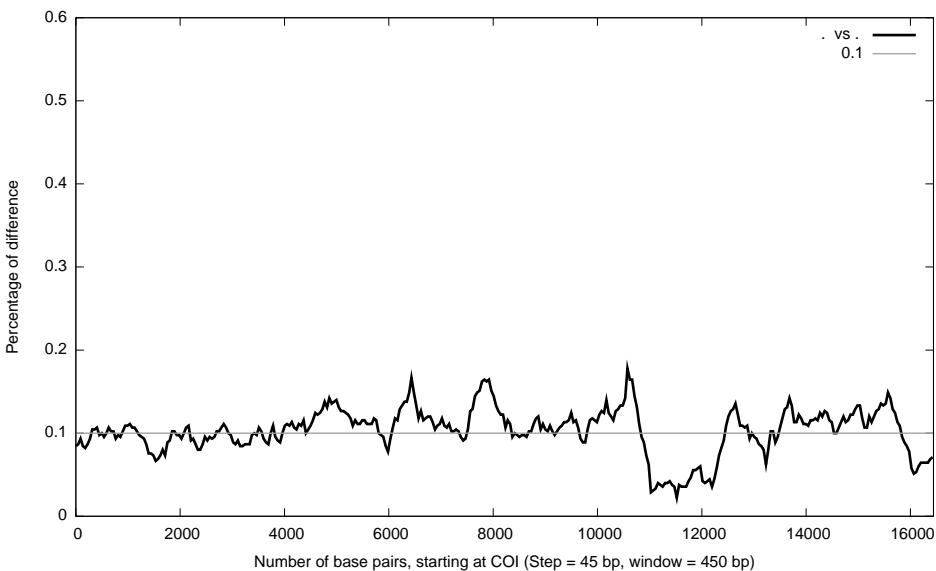

Supplement: S3 (10.1371/journal.pone.0051263.s003) [file journal.pone.0051263.s003]

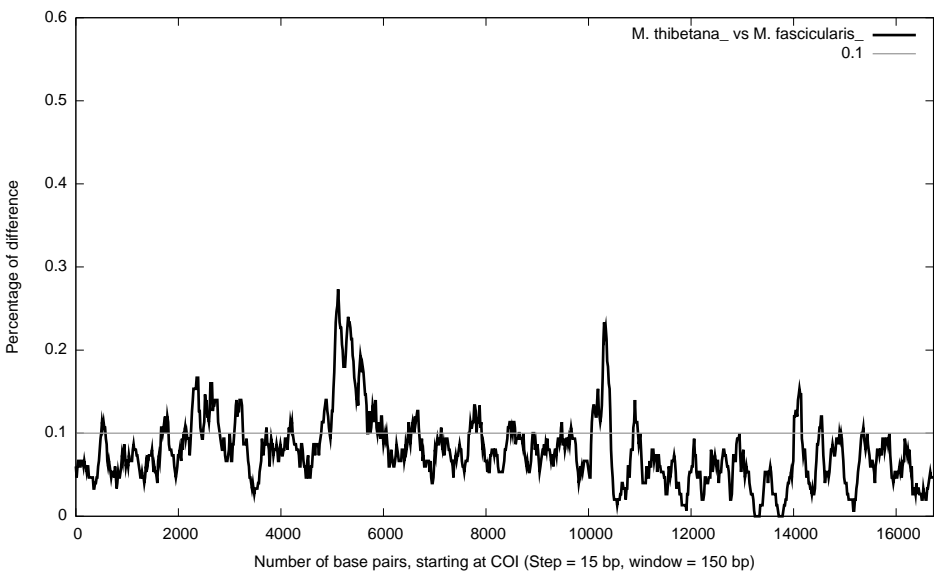

Supplement: S3 (10.1371/journal.pone.0051263.s003) [file journal.pone.0051263.s003]

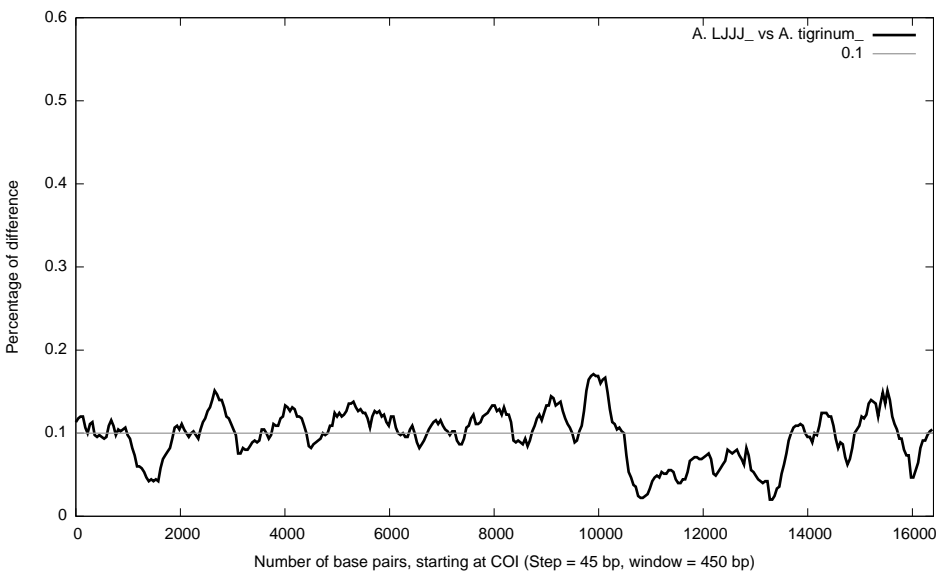

Supplement: S3 (10.1371/journal.pone.0051263.s003) [file journal.pone.0051263.s003]

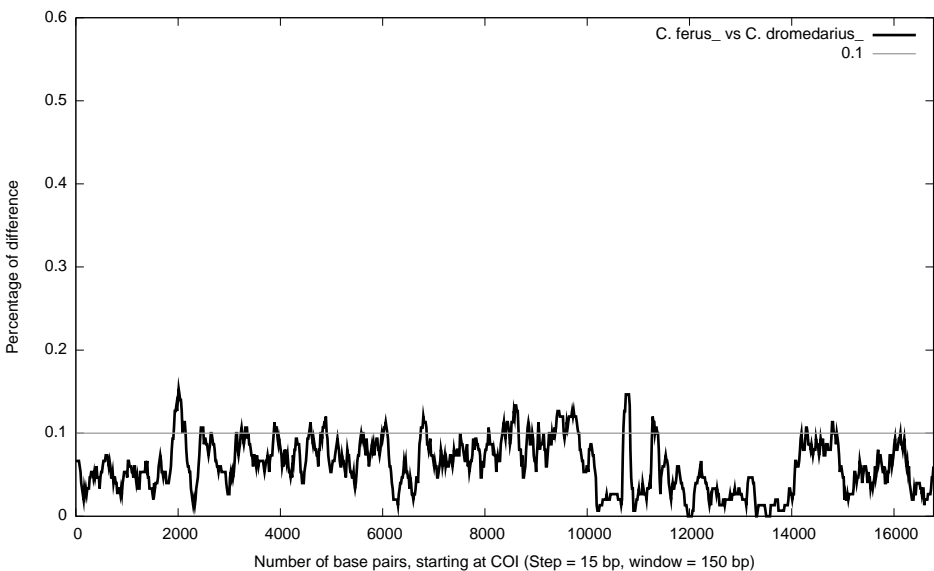

Supplement: S3 (10.1371/journal.pone.0051263.s003) [file journal.pone.0051263.s003]

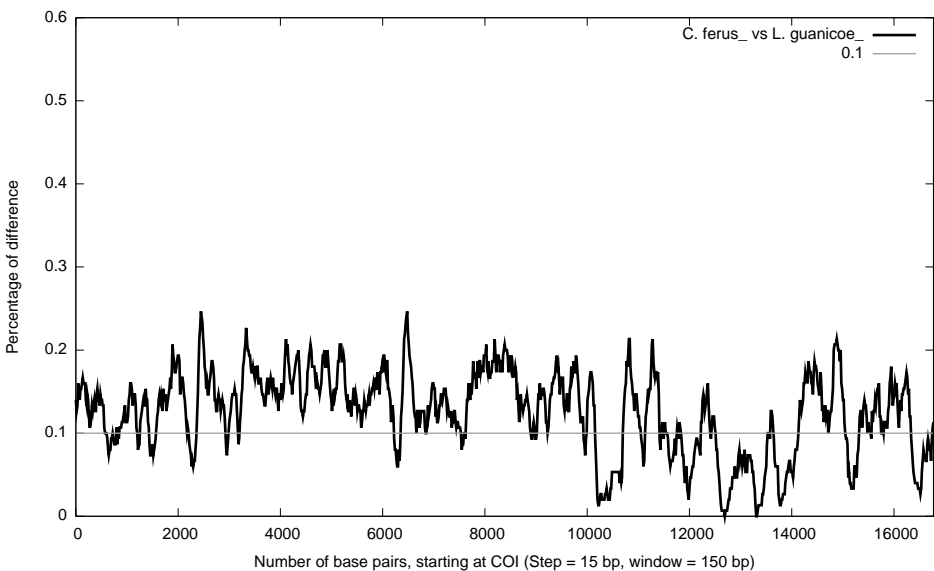

Supplement: S3 (10.1371/journal.pone.0051263.s003) [file journal.pone.0051263.s003]

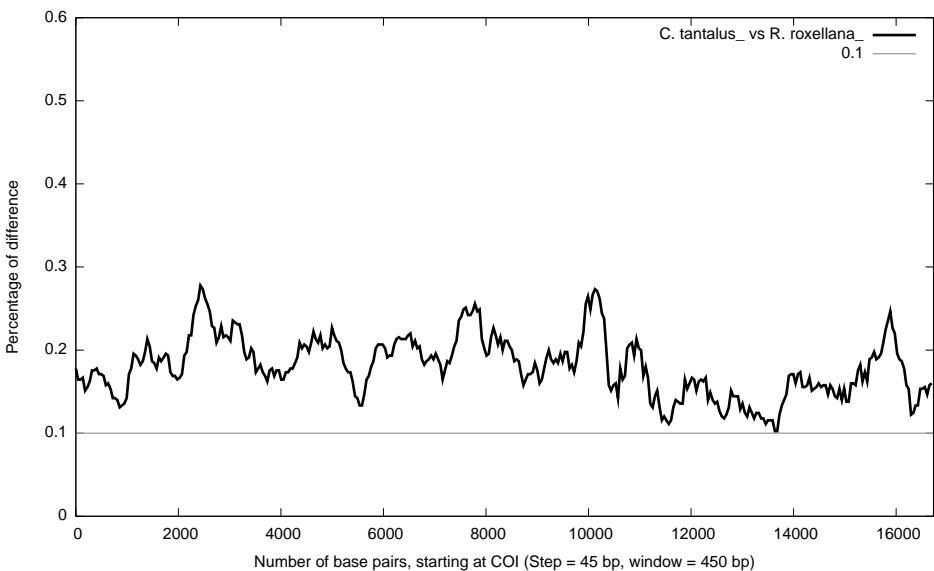

Supplement: S3 (10.1371/journal.pone.0051263.s003) [file journal.pone.0051263.s003]

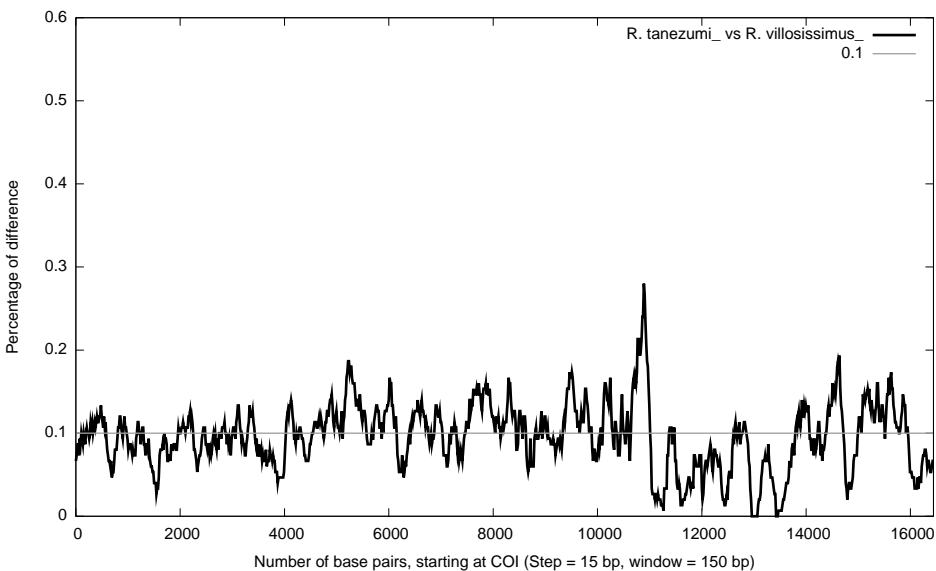

Supplement: S3 (10.1371/journal.pone.0051263.s003) [file journal.pone.0051263.s003]

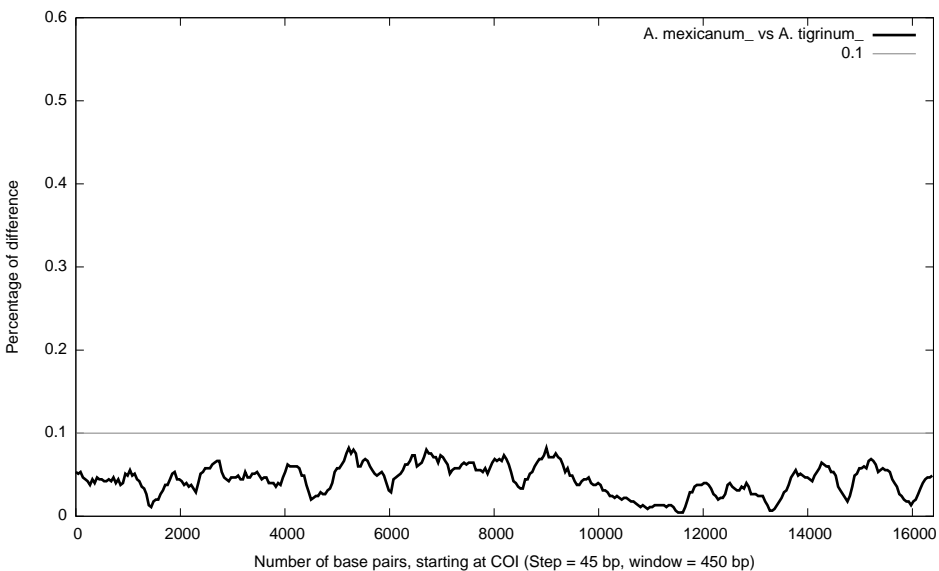

Supplement: S3 (10.1371/journal.pone.0051263.s003) [file journal.pone.0051263.s003]

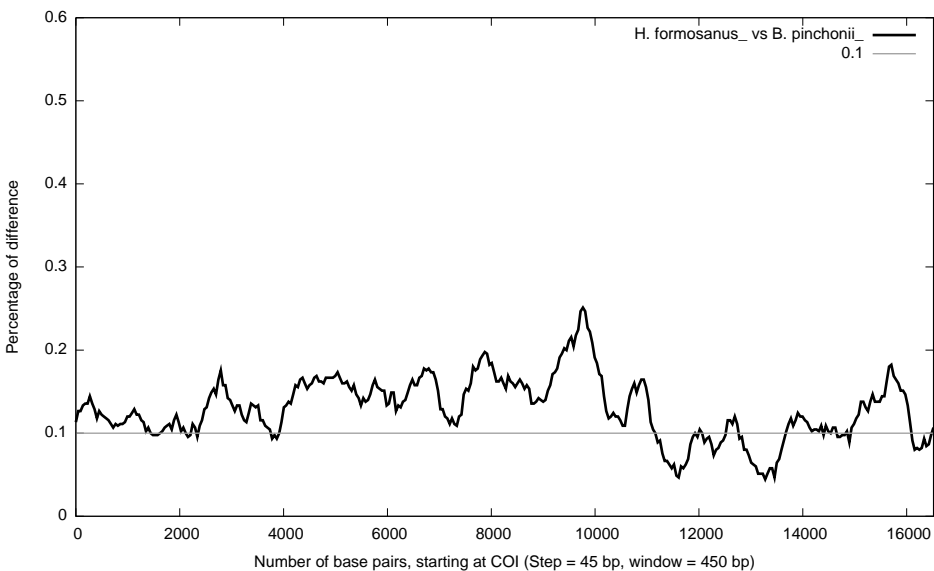

Supplement: S3 (10.1371/journal.pone.0051263.s003) [file journal.pone.0051263.s003]

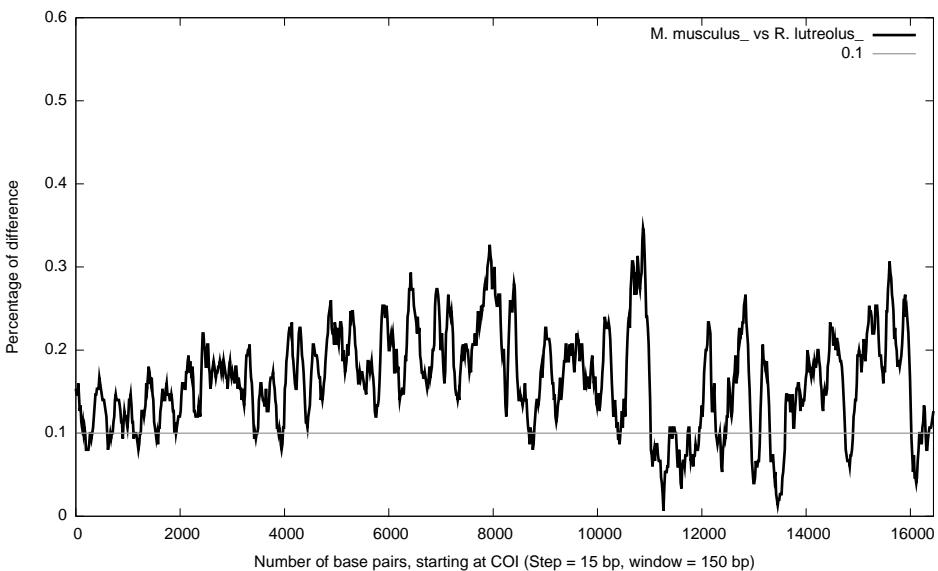

Supplement: S3 (10.1371/journal.pone.0051263.s003) [file journal.pone.0051263.s003]

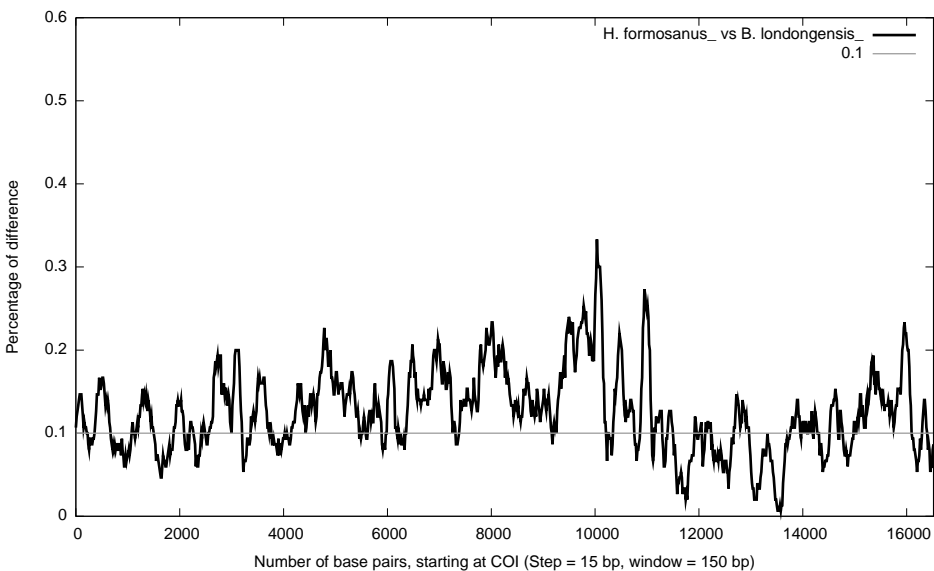

Supplement: S3 (10.1371/journal.pone.0051263.s003) [file journal.pone.0051263.s003]

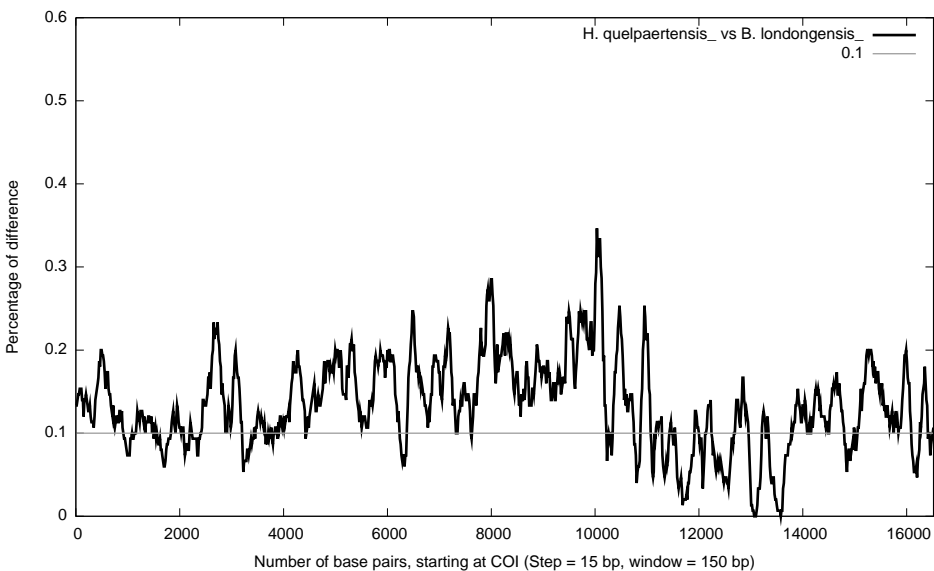

Supplement: S3 (10.1371/journal.pone.0051263.s003) [file journal.pone.0051263.s003]

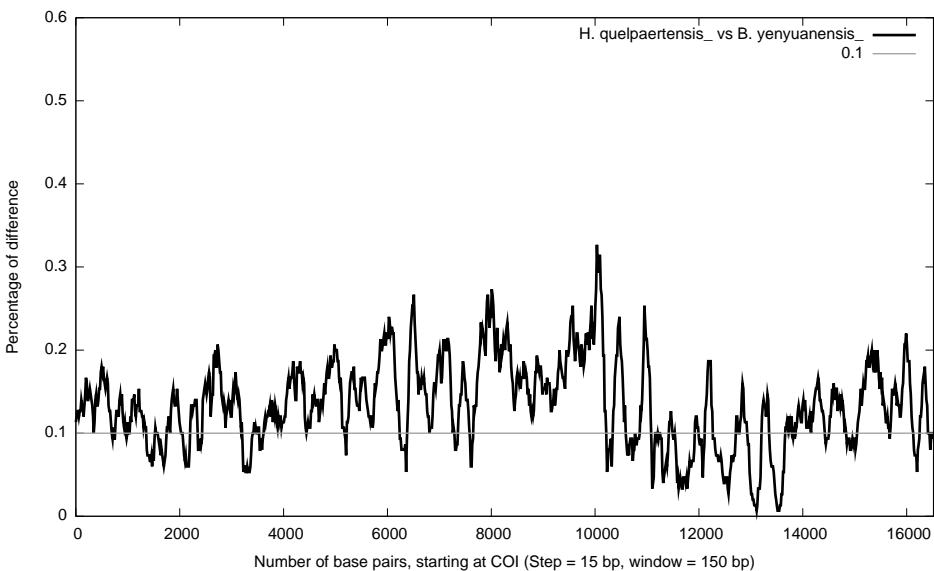

Supplement: S3 (10.1371/journal.pone.0051263.s003) [file journal.pone.0051263.s003]

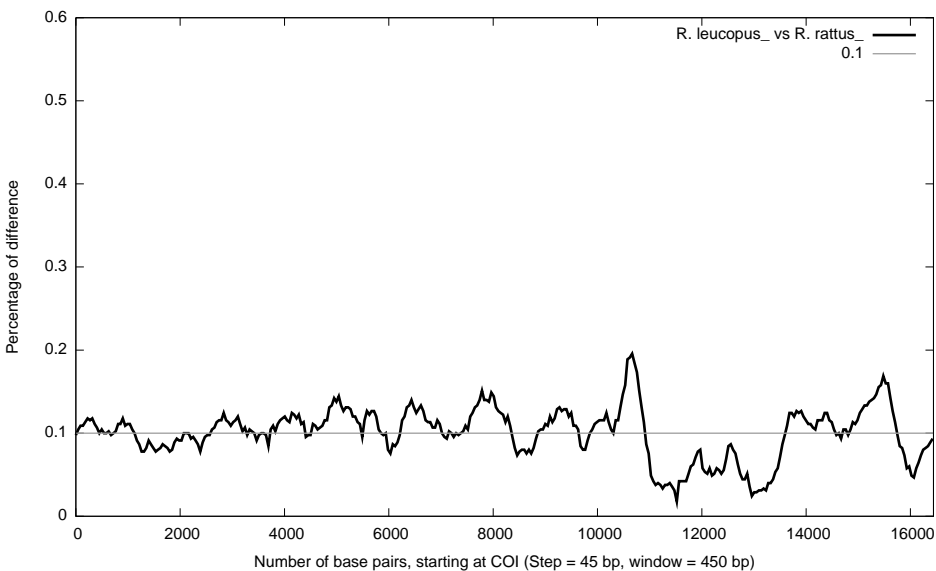

Supplement: S3 (10.1371/journal.pone.0051263.s003) [file journal.pone.0051263.s003]

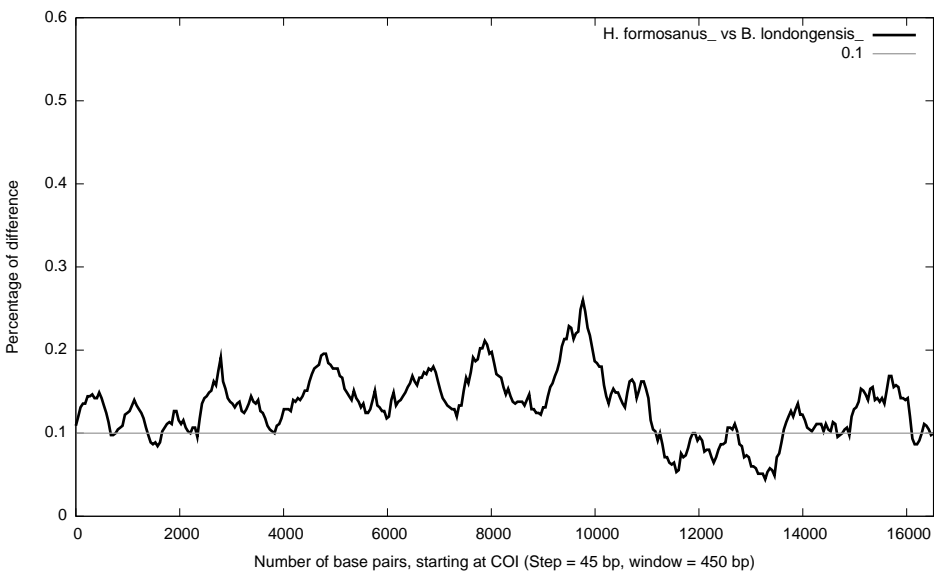

Supplement: S3 (10.1371/journal.pone.0051263.s003) [file journal.pone.0051263.s003]

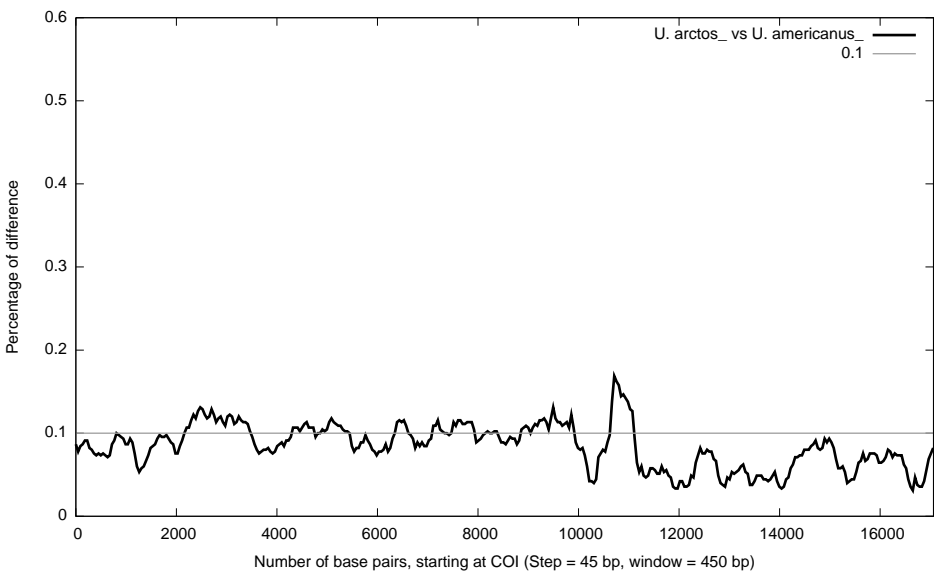

Supplement: S3 (10.1371/journal.pone.0051263.s003) [file journal.pone.0051263.s003]

# Equidae

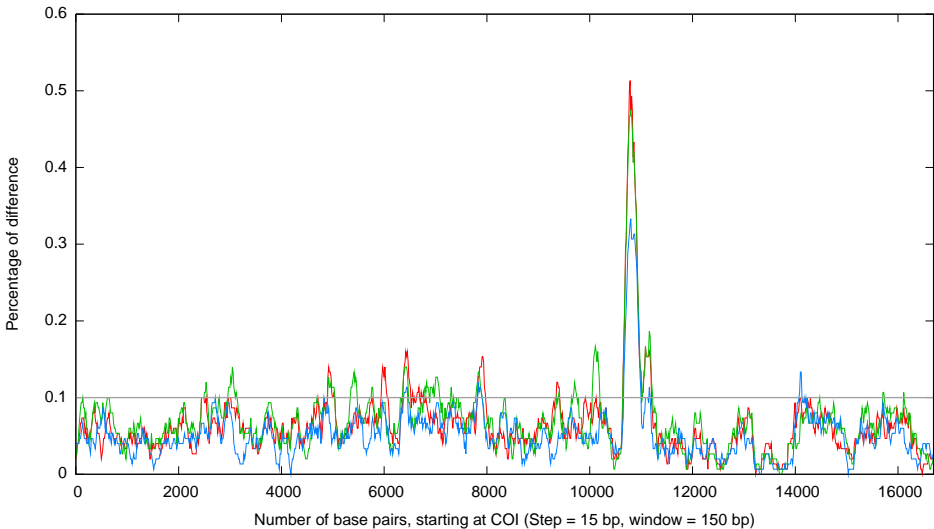

Supplement: S3 (10.1371/journal.pone.0051263.s003) [file journal.pone.0051263.s003]

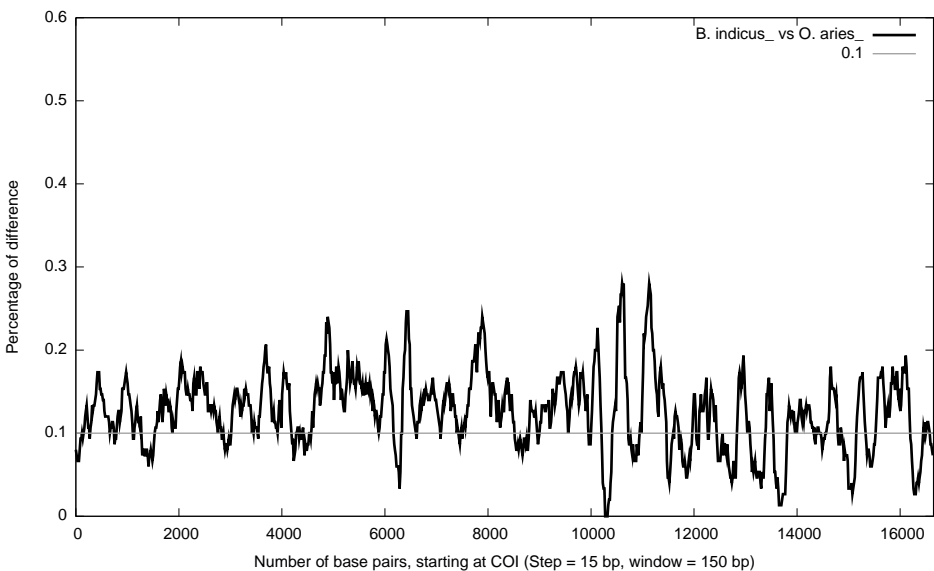

Supplement: S3 (10.1371/journal.pone.0051263.s003) [file journal.pone.0051263.s003]

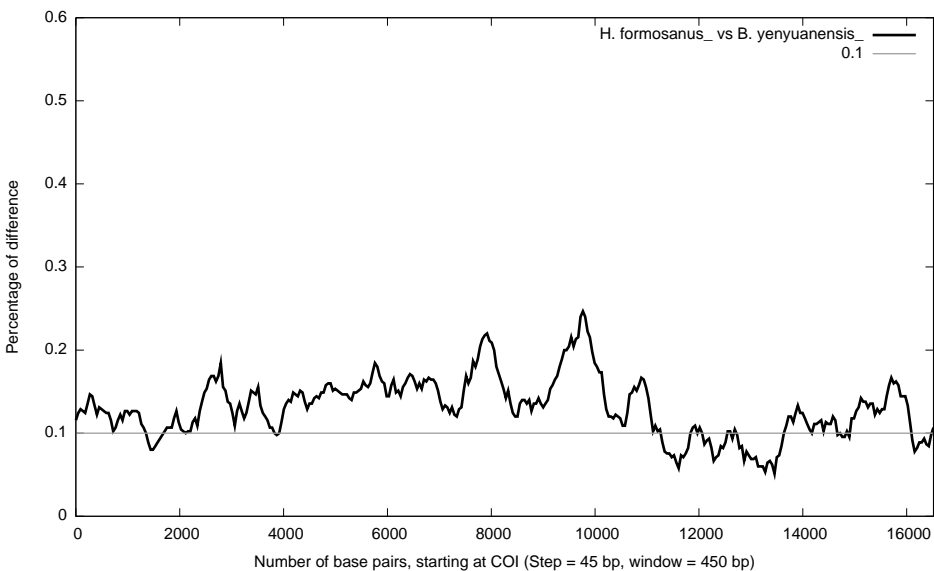

Supplement: S3 (10.1371/journal.pone.0051263.s003) [file journal.pone.0051263.s003]

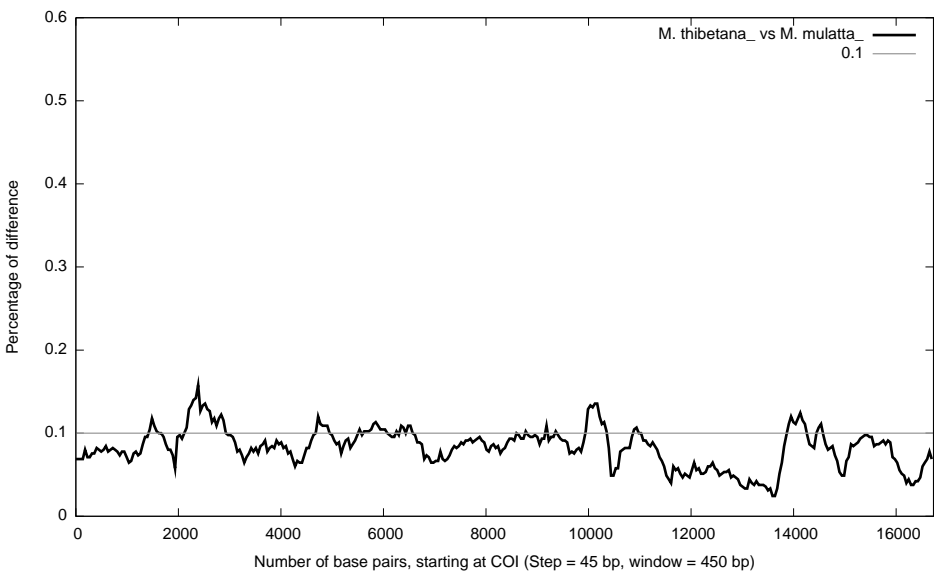

Supplement: S3 (10.1371/journal.pone.0051263.s003) [file journal.pone.0051263.s003]

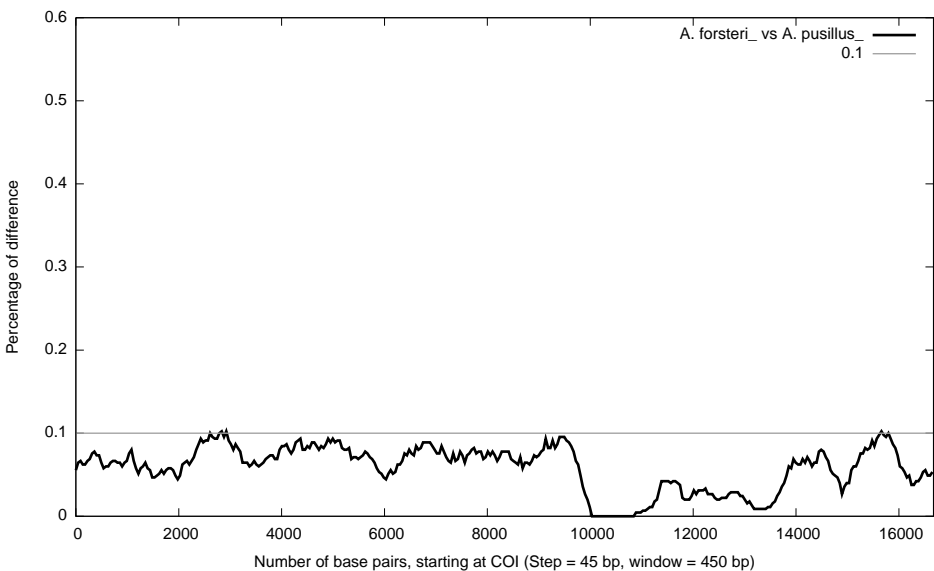

Supplement: S3 (10.1371/journal.pone.0051263.s003) [file journal.pone.0051263.s003]
